# Supplementary material for: Taxonomic Structure and Diversity of Benthic Diatoms (Bacillariophyta) in the Northern Shelf of the Black Sea
Source: MDPI journal article supplement (doi:10.3390/phycology3030022), 2023-07-07
Supplement: s1 [file s1]

## The master list of benthic diatoms (Bacillariophyta) at the Black Sea Northern shelf

| Taxa: class, order, family, genus, species, intraspecific taxon                  | Synonym                                                                                                           | Bulgaria | Romania | NWBS | Crimea | NEBS |
|----------------------------------------------------------------------------------|-------------------------------------------------------------------------------------------------------------------|----------|---------|------|--------|------|
| 1                                                                                | 2                                                                                                                 | 3        | 4       | 5    | 6      | 7    |
| <b>COSCINODISCOPHYCEAE</b>                                                       |                                                                                                                   |          |         |      |        |      |
| <b>THALASSIOSIRALES Gleser et I.V. Makarova 1986</b>                             |                                                                                                                   |          |         |      |        |      |
| <b>Thalassiosiraceae M. Lebour 1930</b>                                          |                                                                                                                   |          |         |      |        |      |
| <b>Thalassiosira Cleve 1873</b>                                                  |                                                                                                                   |          |         |      |        |      |
| <i>Thalassiosira antiqua</i> (Grunow) Cleve-Euler 1941                           | Bas.: <i>Coscinodiscus excentricus</i> var. <i>antiquus</i> Grunow 1884                                           | -        | +       | -    | +      | +    |
| <i>Thalassiosira antiqua</i> var. <i>septata</i> Proschk.-Lavr. 1955             |                                                                                                                   | -        | +       | -    | -      | -    |
| <i>Thalassiosira baltica</i> (Grunow) Ostenf. 1901                               | Bas.: <i>Coscinodiscus polyacanthus</i> var. <i>baltica</i> Grunow 1880                                           | -        | -       | +    | +      | -    |
| <i>Thalassiosira coronata</i> Proschk.-Lavr. 1955                                |                                                                                                                   | -        | +       | +    | +      | +    |
| <i>Thalassiosira decipiens</i> (Grunow) Jørg. 1905                               | Bas.: <i>Coscinodiscus eccentricus</i> var. <i>decipiens</i> Grunow 1878                                          | -        | +       | +    | +      | -    |
| <i>Thalassiosira eccentrica</i> (Ehrenb.) Cleve emend Fryxell et Hasle 1972      | Bas.: <i>Coscinodiscus eccentricus</i> Ehrenb. 1840                                                               | -        | +       | +    | +      | +    |
| <i>Thalassiosira excentrica</i> var. <i>fasciculata</i> (Hust.) Nizam. 1984      | Bas.: <i>Coscinodiscus eccentricus</i> var. <i>fasciculatus</i> Hust. 1928                                        | -        | +       | -    | +      | -    |
| <i>Thalassiosira incerta</i> I.V. Makarova 1961                                  |                                                                                                                   | -        | -       | +    | +      | -    |
| <i>Thalassiosira nordenskiöldii</i> Cleve 1873                                   | Syn.: <i>Coscinodiscus nordenskiöldii</i> (Cleve) Cleve-Euler 1951                                                | -        | +       | -    | -      | -    |
| <i>Thalassiosira oestrupii</i> (Ostenf.) Hasle 1972                              | Bas.: <i>Coscosira oestrupii</i> Ostenf. 1900; Syn.: <i>Thalassiosira oestrupii</i> (Ostenf.) Proschk.-Lavr. 1960 | -        | -       | -    | +      | -    |
| <i>Thalassiosira parva</i> Proschk.-Lavr. 1955                                   |                                                                                                                   | -        | +       | +    | +      | +    |
| <i>Thalassiosira parvula</i> I.V. Makarova 1977                                  |                                                                                                                   | -        | -       | +    | +      | -    |
| <i>Thalassiosira subsalina</i> Proschk.-Lavr. 1955                               |                                                                                                                   | -        | +       | +    | +      | -    |
| <i>Thalassiosira</i> sp.                                                         |                                                                                                                   | -        | -       | -    | +      | -    |
| <b>Stephanodiscaceae I.V. Makarova 1986</b>                                      |                                                                                                                   |          |         |      |        |      |
| <b>Cyclotella (Kütz.) Bréb. 1838</b>                                             |                                                                                                                   |          |         |      |        |      |
| <i>Cyclotella caspia</i> Grunow 1878                                             |                                                                                                                   | -        | +       | +    | +      | +    |
| <i>Cyclotella choctawhatcheeana</i> Prasad 1990*                                 |                                                                                                                   | -        | -       | -    | +      | -    |
| <i>Cyclotella comensis</i> Grunow 1882                                           |                                                                                                                   | -        | -       | -    | +      | -    |
| <i>Cyclotella convexa</i> Bodeanu 1976                                           |                                                                                                                   | -        | +       | -    | -      | -    |
| <i>Cyclotella meneghiniana</i> Kütz. 1844                                        |                                                                                                                   | -        | +       | +    | +      | -    |
| <i>Cyclotella meneghiniana</i> var. <i>kuetzingiana</i> (Thwaites) Playfair 1913 | Bas.: <i>Cyclotella kuetzingiana</i> Thwaites 1848                                                                | -        | -       | +    | +      | +    |
| <i>Cyclotella ocellata</i> Pant. 1902                                            |                                                                                                                   | -        | -       | -    | +      | -    |
| <i>Cyclotella operculata</i> (C. Agardh) Kütz. 1833                              |                                                                                                                   | -        | -       | +    | +      | +    |
| <i>Cyclotella striata</i> Grunow 1880                                            |                                                                                                                   | -        | -       | +    | +      | -    |
| <i>Cyclotella undulata</i> Bodeanu 1976                                          |                                                                                                                   | -        | +       | -    | -      | -    |

| 1                                                                              | 2                                                                                                                                                 | 3 | 4 | 5 | 6 | 7 |
|--------------------------------------------------------------------------------|---------------------------------------------------------------------------------------------------------------------------------------------------|---|---|---|---|---|
| <i>Cyclotella</i> sp.1                                                         |                                                                                                                                                   | - | - | - | + | - |
| <b><i>Discostella</i> Houk et Klee 2004</b>                                    |                                                                                                                                                   |   |   |   |   |   |
| <i>Discostella stelligera</i> (Cleve et Grunow) Houk et Klee 2004              | Bas.: <i>Cyclotella meneghiniana</i> var. <i>stelligera</i> Cleve 1881; Syn.: <i>Cyclotella stelligera</i> (Cleve) Van Heurck 1882                | - | + | - | - | - |
| <b><i>Cyclostephanos</i> Round 1987</b>                                        |                                                                                                                                                   |   |   |   |   |   |
| <i>Cyclostephanos dubius</i> (Friske) Round 1982*                              | Bas.: <i>Cyclotella dubia</i> Friske ex A.W.F. Schmidt et al. 1900                                                                                | - | + | - | + | - |
| <i>Cyclostephanos dubius</i> var. <i>romanicus</i> (Bodeanu) Ryabushko 2013    | Bas.: <i>Stephanodiscus dubius</i> var. <i>romanicus</i> Bodeanu 1988                                                                             | - | + | - | - | - |
| <b><i>Stephanodiscus</i> Ehrenb. 1845</b>                                      |                                                                                                                                                   |   |   |   |   |   |
| <i>Stephanodiscus hantzschii</i> Grunow ex Cleve et Grunow 1880                |                                                                                                                                                   | - | + | + | + | + |
| <i>Stephanodiscus medius</i> Håk. 1986*                                        | Bas.: <i>Stephanodiscus minutus</i> Grunow ex Cleve et J.D. Möller 1879                                                                           | - | - | + | - | - |
| <i>Stephanodiscus rotula</i> (Kütz.) Hendey 1964                               | Bas.: <i>Cyclotella rotula</i> Kütz. 1844                                                                                                         | - | + | - | - | - |
| <i>Stephanodiscus subsalsus</i> (Cleve-Euler) Hust. 1928                       | Bas.: <i>Melosira subsalsa</i> Cleve-Euler 1912                                                                                                   | - | + | - | - | - |
| <b><i>Puncticulata</i> Håk. 1986</b>                                           |                                                                                                                                                   |   |   |   |   |   |
| <i>Puncticulata radiosa</i> (Lemmerm.) Håk. 2002                               | Bas.: <i>Cyclotella comta</i> var. <i>radiosa</i> Grunow ex Van Heurck 1882; Syn.: <i>Cyclotella radiosa</i> (Grunow ex Van Heurck) Lemmerm. 1900 | - | - | - | + | - |
| <b>MELOSIRALES R.M. Crawford 1990</b>                                          |                                                                                                                                                   |   |   |   |   |   |
| <b>Melosiraceae Kütz. 1844 emend R.M. Crawford 1990</b>                        |                                                                                                                                                   |   |   |   |   |   |
| <b><i>Melosira</i> C. Agardh 1824</b>                                          |                                                                                                                                                   |   |   |   |   |   |
| <i>Melosira lineata</i> (Dillwyn) C. Agardh 1824 emend R.M. Crawford 1978      | Bas.: <i>Conferva lineata</i> Dillwyn 1809                                                                                                        | - | + | + | + | + |
| <i>Melosira moniliformis</i> (O.F. Müll.) C. Agardh 1824                       | Bas.: <i>Conferva moniliformis</i> O.F. Müll. 1783                                                                                                | + | + | + | + | + |
| <i>Melosira moniliformis</i> var. <i>hispidum</i> (Castracane) Zimmermann 1915 | Bas.: <i>Melosira borneri</i> var. <i>hispidum</i> Castracane 1878                                                                                | - | - | + | - | - |
| <i>Melosira moniliformis</i> var. <i>octogona</i> (Grunow) Hust. 1927          | Bas.: <i>Melosira borneri</i> var. <i>octogona</i> Grunow 1878                                                                                    | - | + | + | + | + |
| <i>Melosira moniliformis</i> var. <i>subglobosa</i> (Grunow) Hust. 1927        | Bas.: <i>Melosira borneri</i> var. <i>subglobosa</i> Grunow 1878                                                                                  | - | + | + | + | + |
| <i>Melosira nummuloides</i> (Dillwyn) C. Agardh 1824                           | Bas.: <i>Conferva nummuloides</i> Dillwyn 1809                                                                                                    | + | + | + | + | + |
| <i>Melosira varians</i> C. Agardh 1827                                         |                                                                                                                                                   | + | + | - | - | - |
| <b>Endictyaceae R.M. Crawford 1990</b>                                         |                                                                                                                                                   |   |   |   |   |   |
| <b><i>Endictya</i> Ehrenb. 1845</b>                                            |                                                                                                                                                   |   |   |   |   |   |
| <i>Endictya oceanica</i> Ehrenb. 1845                                          |                                                                                                                                                   | - | + | + | + | + |
| <b>Hyalodiscaceae R.M. Crawford 1990</b>                                       |                                                                                                                                                   |   |   |   |   |   |
| <b><i>Hyalodiscus</i> Ehrenb. 1845</b>                                         |                                                                                                                                                   |   |   |   |   |   |
| <i>Hyalodiscus ambiguus</i> (Grunow) Temp. et H. Perag.                        | Bas.: <i>Podosira ambigua</i>                                                                                                                     | - | + | + | + | + |

| 1                                                                                                                                    | 2                                                                                                                                                                                    | 3 | 4 | 5 | 6 | 7 |
|--------------------------------------------------------------------------------------------------------------------------------------|--------------------------------------------------------------------------------------------------------------------------------------------------------------------------------------|---|---|---|---|---|
| 1889                                                                                                                                 | Grunow 1879                                                                                                                                                                          |   |   |   |   |   |
| <i>Hyalodiscus scoticus</i> (Kütz.) Grunow 1879                                                                                      | Bas.: <i>Cyclotella scotica</i> Kütz. 1844                                                                                                                                           | + | + | + | + | + |
| <i>Hyalodiscus scoticus</i> var. <i>griseolus</i> Proschk.-Lavr. 1961                                                                |                                                                                                                                                                                      | + | - | - | + | - |
| <i>Hyalodiscus subtilis</i> J.W. Bailey 1854                                                                                         |                                                                                                                                                                                      | + | - | - | - | - |
| <b><i>Podosira</i> Ehrenb. 1840</b>                                                                                                  |                                                                                                                                                                                      |   |   |   |   |   |
| <i>Podosira hormoides</i> (Mont.) Kütz. 1844                                                                                         | Bas.: <i>Melosira hormoides</i> Mont. 1839                                                                                                                                           | + | + | + | + | + |
| <i>Podosira hormoides</i> var. <i>parvula</i> Proschk.-Lavr. 1963                                                                    |                                                                                                                                                                                      | - | + | + | - | - |
| <i>Podosira maxima</i> var. <i>minuta</i> Proschk.-Lavr. 1963                                                                        |                                                                                                                                                                                      | - | - | + | + | - |
| <i>Podosira pellucida</i> Proschk.-Lavr. 1963                                                                                        |                                                                                                                                                                                      | + | + | + | + | - |
| <b>PARALIALES R.M. Crawford 1990</b><br><b>Paraliaceae R.M. Crawford 1988</b><br><b><i>Paralia</i> Heib. 1863</b>                    |                                                                                                                                                                                      |   |   |   |   |   |
| <i>Paralia sulcata</i> (Ehrenb.) Cleve 1873                                                                                          | Bas.: <i>Gaillonella sulcata</i> Ehrenb. 1838; Syn.: <i>Melosira sulcata</i> (Ehrenb.) Kütz. 1844; <i>Melosira sulcata</i> (Ehrenb.) Hanna 1932                                      | + | + | + | + | + |
| <b>AULACOSEIRALES R.M. Crawford 1990</b><br><b>Aulacoseiraceae R.M. Crawford 1990</b><br><b><i>Aulacoseira</i> Thw. 1848</b>         |                                                                                                                                                                                      |   |   |   |   |   |
| <i>Aulacoseira distans</i> (Ehrenb.) Simonsen 1979                                                                                   | Bas.: <i>Gaillonella distans</i> Ehrenb. 1837, Syn.: <i>Melosira distans</i> (Ehrenb.) Kütz. 1844                                                                                    | - | + | - | - | - |
| <i>Aulacoseira granulata</i> (Ehrenb.) Simonsen 1979                                                                                 | Bas.: <i>Gaillonella granu-lata</i> Ehrenb. 1843; Syn.: <i>Melosira granulata</i> (Ehrenb.) Ralfs ex A. Pritch. 1861                                                                 | - | + | + | + | - |
| <i>Aulacoseira islandica</i> (O. Müll.) Simonsen 1979                                                                                | Bas.: <i>Melosira islandica</i> O. Müll. 1906                                                                                                                                        | - | + | - | - | - |
| <i>Aulacoseira italica</i> (Ehrenb.) Simonsen 1979                                                                                   | Bas.: <i>Gaillonella italica</i> Ehrenb. 1838, Syn.: <i>Melosira italica</i> (Ehrenb.) Kütz. 1844; <i>Melosira crenulata</i> var. <i>italica</i> (Ehrenb.) Grunow ex Van Heurck 1882 | - | + | + | - | - |
| <b>ORTHOSEIRALES R.M. Crawford 1990</b><br><b>Orthoseiraceae R.M. Crawford 1990</b><br><b><i>Orthoseira</i> Thw. 1848</b>            |                                                                                                                                                                                      |   |   |   |   |   |
| <i>Orthoseira roeseana</i> (Rabenh.) O'Meara 1875                                                                                    | Bas.: <i>Melosira roeseana</i> Rabenh. 1853                                                                                                                                          | - | + | - | - | - |
| <b>COSCINODISCALES Round et R.M. Crawford 1990</b><br><b>Coscinodiscaceae Kütz. 1844</b><br><b><i>Coscinodiscus</i> Ehrenb. 1839</b> |                                                                                                                                                                                      |   |   |   |   |   |
| <i>Coscinodiscus apiculatus</i> Ehrenb. 1844                                                                                         |                                                                                                                                                                                      | + | + | + | + | - |
| <i>Coscinodiscus asteromphalus</i> Ehrenb. 1844                                                                                      |                                                                                                                                                                                      | + | + | - | + | - |
| <i>Coscinodiscus asteromphalus</i> var. <i>subbulliens</i> (Jørg.) Cleve-Euler 1942                                                  | Bas.: <i>Coscinodiscus subbulliens</i> Jørg. 1905                                                                                                                                    | + | - | - | - | - |
| <i>Coscinodiscus concinnus</i> W. Sm. 1856                                                                                           | Syn.: <i>Coscinodiscus radiatus</i>                                                                                                                                                  | - | + | + | + | - |

| 1                                                                            | 2                                                                                                                                                                                                                                                                                                                                                               | 3 | 4 | 5 | 6 | 7 |
|------------------------------------------------------------------------------|-----------------------------------------------------------------------------------------------------------------------------------------------------------------------------------------------------------------------------------------------------------------------------------------------------------------------------------------------------------------|---|---|---|---|---|
|                                                                              | var. <i>concinus</i> (W. Sm.) Van<br>Heurck 1896                                                                                                                                                                                                                                                                                                                |   |   |   |   |   |
| <i>Coscinodiscus gigas</i> Ehrenb. 1843                                      |                                                                                                                                                                                                                                                                                                                                                                 | - | - | + | + | - |
| <i>Coscinodiscus granii</i> Gough 1905                                       |                                                                                                                                                                                                                                                                                                                                                                 | + | + | + | + | - |
| <i>Coscinodiscus janischii</i> A.W.F. Schmidt 1878                           | Syn.: <i>Coscinodiscus gigas</i> var.<br><i>janischii</i> (A.W.F. Schmidt)<br>Freng. 1928                                                                                                                                                                                                                                                                       | - | + | + | + | + |
| <i>Coscinodiscus jonesianus</i> (Grev.) Ostenf. 1915                         | Bas.: <i>Eupodiscus jonesianus</i><br>Grev. 1862                                                                                                                                                                                                                                                                                                                | + | + | + | + | - |
| <i>Coscinodiscus jonesianus</i> var. <i>commutata</i> (Grunow)<br>Hust. 1928 | Bas.: <i>Eupodiscus commutatus</i><br>Grunow 1884                                                                                                                                                                                                                                                                                                               | + | - | + | - | - |
| <i>Coscinodiscus lewisianus</i> Grev. 1866                                   |                                                                                                                                                                                                                                                                                                                                                                 | + | - | - | - | - |
| <i>Coscinodiscus lineatus</i> Ehrenb. 1839                                   |                                                                                                                                                                                                                                                                                                                                                                 | - | + | - | + | - |
| <i>Coscinodiscus nodulifer</i> A.W.F. Schmidt 1878                           |                                                                                                                                                                                                                                                                                                                                                                 | + | - | - | - | - |
| <i>Coscinodiscus oculus-iridis</i> Ehrenb. 1840 emend<br>Sancetta 1987       |                                                                                                                                                                                                                                                                                                                                                                 | - | + | - | + | + |
| <i>Coscinodiscus perforatus</i> Ehrenb. 1844                                 |                                                                                                                                                                                                                                                                                                                                                                 | - | + | + | - | + |
| <i>Coscinodiscus radiatus</i> Ehrenb. 1840                                   |                                                                                                                                                                                                                                                                                                                                                                 | + | + | + | + | + |
| <i>Coscinodiscus</i> sp.1                                                    |                                                                                                                                                                                                                                                                                                                                                                 | - | - | - | + | - |
| <i>Coscinodiscus</i> sp.3                                                    |                                                                                                                                                                                                                                                                                                                                                                 | - | - | - | + | + |
| <b>Hemidiscaceae Hendey 1937 emend. Simonsen 1975</b>                        |                                                                                                                                                                                                                                                                                                                                                                 |   |   |   |   |   |
| <b><i>Actinocyclus</i> Ehrenb. 1837</b>                                      |                                                                                                                                                                                                                                                                                                                                                                 |   |   |   |   |   |
| <i>Actinocyclus octonarius</i> Ehrenb. 1838                                  |                                                                                                                                                                                                                                                                                                                                                                 | + | + | + | + | + |
| <i>Actinocyclus octonarius</i> var. <i>crassus</i> (W. Sm.) Hendey<br>1954   | Bas.: <i>Eupodiscus crassus</i> W.<br>Sm. 1853; Syn.: <i>Actinocyclus</i><br><i>crassus</i> (W. Sm.) Ralfs ex A.<br>Pritch. 1861; <i>Actinocyclus</i><br><i>crassus</i> (W. Sm.) Van Heurck<br>1883; <i>Actinocyclus ehrenbergii</i><br>var. <i>crassa</i> (W. Sm.) Hust.<br>1929; <i>Actinocyclus octonarius</i><br>var. <i>crassus</i> (W. Sm.) Hajós<br>1968 | - | - | - | + | + |
| <i>Actinocyclus octonarius</i> var. <i>ralfsii</i> (W. Sm.) Hendey<br>1954   | Bas.: <i>Eupodiscus ralfsii</i> W.<br>Sm. 1856; Syn.: <i>Actinocyclus</i><br><i>ralfsii</i> (W. Sm.) Ralfs ex A.<br>Pritch. 1861, <i>Actinocyclus</i><br><i>ehrenbergii</i> var. <i>ralfsii</i> (W.<br>Sm.) Hust. 1929                                                                                                                                          | + | - | - | + | + |
| <i>Actinocyclus subtilis</i> (W. Greg.) Ralfs ex A. Pritch. 1861             | Syn.: <i>Eupodiscus subtilis</i> W.<br>Greg., <i>Eupodiscus</i><br><i>gregoryanus</i> Bréb.                                                                                                                                                                                                                                                                     | - | - | + | + | - |
| <i>Actinocyclus tenellus</i> (Bréb.) Grunow 1867                             | Bas.: <i>Eupodiscus tenellus</i><br>Bréb. 1854; Syn.: <i>Actinocyclus</i><br><i>ehrenbergii</i> var. <i>tenella</i> (Bréb.)<br>Hust. 1929; <i>Actinocyclus</i><br><i>octonarius</i> var. <i>tenellus</i><br>(Bréb.) Hendey 1954;<br><i>Actinocyclus octonarius</i> var.<br><i>tenellus</i> (Bréb.) Hajós 1968;                                                  | + | + | + | + | + |



| 1                                                                      | 2                                                                                                        | 3 | 4 | 5 | 6 | 7 |
|------------------------------------------------------------------------|----------------------------------------------------------------------------------------------------------|---|---|---|---|---|
| <b>Plagiogramma Grev. 1859</b>                                         |                                                                                                          |   |   |   |   |   |
| <i>Plagiogramma staurophorum</i> (W. Greg.) Heib. 1863                 | Bas.: <i>Denticula staurophora</i> W. Greg. 1857                                                         | - | - | - | + | - |
| <i>Plagiogramma tenuissima</i> Hust. 1956*                             |                                                                                                          | - | - | - | + | - |
| <i>Plagiogramma</i> sp.                                                |                                                                                                          | - | - | - | + | - |
| <b>Glyphodesmis Grev. 1862</b>                                         |                                                                                                          |   |   |   |   |   |
| <i>Glyphodesmis distans</i> (W. Greg.) Grunow ex Van Heurck 1881       | Bas.: <i>Denticula distans</i> W. Greg. 1857, Syn.: <i>Dimeregramma distans</i> Ralfs ex A. Pritch. 1861 | + | + | + | + | + |
| <b>Dimeregramma Ralfs ex A. Pritch. 1861</b>                           |                                                                                                          |   |   |   |   |   |
| <i>Dimeregramma fulvum</i> (W. Greg.) Ralfs ex A. Pritch. 1861         | Bas.: <i>Denticula fulva</i> W. Greg. 1857                                                               | - | + | - | + | + |
| <i>Dimeregramma minor</i> (W. Greg.) Ralfs ex A. Pritch. 1861          | Bas.: <i>Denticula minor</i> W. Greg. 1857                                                               | + | + | + | + | + |
| <i>Dimeregramma minor</i> var. <i>nana</i> (W. Greg.) Van Heurck 1885* | Bas.: <i>Denticula nana</i> W. Greg. 1857, <i>Dimeregramma nanum</i> Ralfs ex A. Pritch. 1861            | - | - | + | + | - |
| <i>Dimeregramma</i> sp.1                                               |                                                                                                          | - | - | - | + | - |
| <b>BIDDULPHIALES Willi Krieg. 1954</b>                                 |                                                                                                          |   |   |   |   |   |
| <b>Biddulphiaceae Kütz. 1844</b>                                       |                                                                                                          |   |   |   |   |   |
| <b><i>Biddulphia</i> Gray 1821</b>                                     |                                                                                                          |   |   |   |   |   |
| <i>Biddulphia rostrata</i> var. <i>alata</i> Proschk.-Lavr. 1961       |                                                                                                          | - | - | + | + | + |
| <i>Biddulphia vesiculosa</i> (C. Agardh) Kütz. 1833                    | Bas.: <i>Diatoma vesiculosum</i> C. Agardh 1824                                                          | - | + | - | - | - |
| <i>Biddulphia</i> sp.1                                                 |                                                                                                          | - | - | - | + | + |
| <b>ANAULALES Round et R.M. Crawford 1990</b>                           |                                                                                                          |   |   |   |   |   |
| <b>Anaulaceae (Shutt) Lemmerm. 1899</b>                                |                                                                                                          |   |   |   |   |   |
| <b><i>Anaulus</i> Ehrenb. 1844</b>                                     |                                                                                                          |   |   |   |   |   |
| <i>Anaulus minutus</i> Grunow 1882                                     |                                                                                                          | + | - | + | + | - |
| <b>CYMATOSIRALES Round et R.M. Crawford 1990</b>                       |                                                                                                          |   |   |   |   |   |
| <b>Cymatosiraceae Hasle, Stosch et Syvertsen 1983</b>                  |                                                                                                          |   |   |   |   |   |
| <b><i>Cymatosira</i> Grunow 1862</b>                                   |                                                                                                          |   |   |   |   |   |
| <i>Cymatosira belgica</i> Grunow 1881                                  |                                                                                                          | - | - | + | + | + |
| <i>Cymatosira</i> sp.                                                  |                                                                                                          | - | - | - | + | - |
| <b><i>Plagiogrammopsis</i> Hasle, Stosch et Syvertsen 1983</b>         |                                                                                                          |   |   |   |   |   |
| <i>Plagiogrammopsis</i> sp.                                            |                                                                                                          | - | - | - | + | - |
| <b>CHAETOCEROTALES Round et R.M. Crawford 1990</b>                     |                                                                                                          |   |   |   |   |   |
| <b>Chaetocerotaceae Ralfs ex A. Pritch. 1861</b>                       |                                                                                                          |   |   |   |   |   |
| <b><i>Bacteriastrum</i> Shadbolt 1854</b>                              |                                                                                                          |   |   |   |   |   |
| <i>Bacteriastrum hyalinum</i> Lauder 1864                              |                                                                                                          | - | - | + | + | - |
| <b>FRAGILARIOPHYCEAE</b>                                               |                                                                                                          |   |   |   |   |   |
| <b>FRAGILARIALES P.C. Silva 1962</b>                                   |                                                                                                          |   |   |   |   |   |
| <b>Fragilariaceae Grev. 1833</b>                                       |                                                                                                          |   |   |   |   |   |
| <b><i>Fragilaria</i> Lyngb. 1819</b>                                   |                                                                                                          |   |   |   |   |   |
| <i>Fragilaria capucina</i> Desm. 1825 emend Lange-Bert. 1980           |                                                                                                          | - | + | + | + | - |
| <i>Fragilaria crotonensis</i> Kitton 1869                              |                                                                                                          | + | + | - | - | - |
| <i>Fragilaria geocollegarum</i> Witkowski et Lange-Bert. 1995*         |                                                                                                          | - | - | - | + | - |

| 1                                                                                          | 2                                                                                                                                                                                                                                                                                                                                                                  | 3 | 4 | 5 | 6 | 7 |
|--------------------------------------------------------------------------------------------|--------------------------------------------------------------------------------------------------------------------------------------------------------------------------------------------------------------------------------------------------------------------------------------------------------------------------------------------------------------------|---|---|---|---|---|
| <i>Fragilaria improbula</i> Witkowski et Lange-Bert. 1995*                                 |                                                                                                                                                                                                                                                                                                                                                                    | - | - | - | + | - |
| <i>Fragilaria pulchella</i> (Ralfs ex Kütz.) Lange-Bert. 1980                              | Bas.: <i>Exilaria pulchella</i> Ralfs ex Kütz. 1844; Syn.: <i>Synedra pulchella</i> (Ralfs) Kütz. 1844, <i>Ctenophora pulchella</i> (Kütz.) D.M. Williams et Round 1986                                                                                                                                                                                            | + | - | + | + | + |
| <i>Fragilaria cf. pulchella</i> (Ralfs ex Kütz.) Lange-Bert. 1980                          |                                                                                                                                                                                                                                                                                                                                                                    | - | - | - | + | - |
| <i>Fragilaria radians</i> (Kütz.) D.M. Williams et Round 1987                              | Bas.: <i>Synedra radians</i> Kütz. 1844, Syn.: <i>Synedra acus</i> var. <i>radians</i> (Kütz.) Hust. 1930, <i>Synedra acus</i> var. <i>radians</i> (Kütz.) Cleve-Euler 1953, <i>Synedra acus</i> f. <i>radians</i> (Kütz.) Hust. 1957                                                                                                                              | - | - | - | + | - |
| <i>Fragilaria vaucheriae</i> (Kütz.) J.B. Petersen 1938                                    | Bas.: <i>Exilaria vaucheria</i> Kütz. 1833, Syn.: <i>Synedra vaucheriae</i> (Kütz.) Kütz. 1844, <i>Ctenophora vaucheriae</i> (Kütz.) Schonfeldt 1907, <i>Fragilaria vaucheriae</i> var. <i>parvula</i> (Kütz.) Cleve-Euler 1953, <i>Ceratoneis vaucheriae</i> (Kütz.) H. Kobayasi 1965, <i>Fragilaria capucina</i> var. <i>vaucheriae</i> (Kütz.) Lange-Bert. 1980 | - | + | + | + | - |
| <i>Fragilaria</i> sp.1                                                                     |                                                                                                                                                                                                                                                                                                                                                                    | - | - | - | + | - |
| <i>Fragilaria</i> sp.2                                                                     |                                                                                                                                                                                                                                                                                                                                                                    | - | - | - | + | - |
| <i>Fragilaria</i> sp.3                                                                     |                                                                                                                                                                                                                                                                                                                                                                    | - | - | - | + | - |
| <i>Fragilaria</i> sp.4                                                                     |                                                                                                                                                                                                                                                                                                                                                                    | - | - | - | + | - |
| <b>Hannaea R.M. Patrick ex R.M. Patrick et Reimer 1966</b>                                 |                                                                                                                                                                                                                                                                                                                                                                    |   |   |   |   |   |
| <i>Hannaea arcus</i> (Ehrenb.) R.M. Patrick 1961                                           | Bas.: <i>Navicula arcus</i> Ehrenb. 1836, Syn.: <i>Ceratoneis arcus</i> (Ehrenb.) Kütz. 1844, <i>Fragilaria arcus</i> (Ehrenb.) Cleve 1898                                                                                                                                                                                                                         | - | + | - | - | - |
| <b>Asterionella Hassall 1850</b>                                                           |                                                                                                                                                                                                                                                                                                                                                                    |   |   |   |   |   |
| <i>Asterionella formosa</i> Hassall 1850                                                   | Bas.: <i>Asterionella gracillima</i> var. <i>formosa</i> (Hassall) Wislouch 1921                                                                                                                                                                                                                                                                                   | - | + | + | - | - |
| <b>Staurosira Ehrenb. 1843</b>                                                             |                                                                                                                                                                                                                                                                                                                                                                    |   |   |   |   |   |
| <i>Staurosira construens</i> Ehrenb. 1843                                                  | Syn.: <i>Fragilaria construens</i> (Ehrenb.) Grunow 1862                                                                                                                                                                                                                                                                                                           | + | + | + | - | - |
| <i>Staurosira venter</i> (Ehrenb.) H. Kobayasi ex Mayama, M. Idei, K. Osada et Nagumo 2002 | Bas.: <i>Fragilaria venter</i> Ehrenb. 1854, Syn.: <i>Fragilaria construens</i> var. <i>venter</i> (Ehrenb.) Grunow 1881, <i>Staurosira construens</i> var. <i>venter</i> (Ehrenb.) Hamilton 1992, <i>Staurosira construens</i> f. <i>venter</i> (Ehrenb.) Bukht. 1995                                                                                             | - | - | + | - | - |

| 1                                                                                       | 2                                                                                                                                                                                                                                                                                                                                            | 3 | 4 | 5 | 6 | 7 |
|-----------------------------------------------------------------------------------------|----------------------------------------------------------------------------------------------------------------------------------------------------------------------------------------------------------------------------------------------------------------------------------------------------------------------------------------------|---|---|---|---|---|
| <b><i>Staurosirella</i> D.M. Williams et Round 1988</b>                                 |                                                                                                                                                                                                                                                                                                                                              |   |   |   |   |   |
| <i>Staurosirella pinnata</i> (Ehrenb.) D.M. Williams et Round 1987                      | Bas.: <i>Fragilaria pinnata</i> Ehrenb. 1843                                                                                                                                                                                                                                                                                                 | + | + | + | + | - |
| <b><i>Pseudostaurosira</i> D.M. Williams et Round 1988</b>                              |                                                                                                                                                                                                                                                                                                                                              |   |   |   |   |   |
| <i>Pseudostaurosira brevistriata</i> (Grunow) D.M. Williams et Round 1987               | Bas.: <i>Fragilaria brevistriata</i> Grunow 1885                                                                                                                                                                                                                                                                                             | - | + | + | - | - |
| <i>Pseudostaurosira parasitica</i> var. <i>subconstricta</i> (Grunow) E.A. Morales 2003 |                                                                                                                                                                                                                                                                                                                                              | - | - | + | - | - |
| <i>Pseudostaurosira shiloi</i> (Lee, Reimer et McEnery) Hallegraeff et Burford 1996*    | Bas.: <i>Fragilaria shiloi</i> Lee et al. 1980                                                                                                                                                                                                                                                                                               | - | - | - | + | - |
| <b><i>Martyana</i> Round ex Round et al. 1990</b>                                       |                                                                                                                                                                                                                                                                                                                                              |   |   |   |   |   |
| <i>Martyana atomus</i> (Hust.) P.J.M. Snoeijs 1991                                      | Bas.: <i>Fragilaria atomus</i> Hust. 1932                                                                                                                                                                                                                                                                                                    | - | - | - | + | - |
| <i>Martyana martyi</i> (Héríb.) Round 1990                                              | Bas.: <i>Opephora martyi</i> Héríb. 1902; Syn.: <i>Fragilaria mutabilis</i> f. <i>martyi</i> (Héríb.) Cleve-Euler 1932, <i>Fragilaria mutabilis</i> var. <i>intercedens</i> (Héríb.) Cleve-Euler 1932, <i>Fragilaria martyi</i> (Héríb.) Lange-Bert. 1993, <i>Staurosirella martyi</i> (Héríb.) Morales et Manoylov 2006                     | + | + | + | + | + |
| <b><i>Diatoma</i> Bory 1824</b>                                                         |                                                                                                                                                                                                                                                                                                                                              |   |   |   |   |   |
| <i>Diatoma hiemale</i> (Lyngb.) Heib. 1863                                              | Bas.: <i>Fragilaria hiemalis</i> Lyngb. 1819; Syn.: <i>Odontidium hiemale</i> (Lyngb.) Kütz. 1844                                                                                                                                                                                                                                            | - | - | + | + | - |
| <i>Diatoma tenue</i> C. Agardh 1824                                                     | Syn.: <i>Odontidium elongatum</i> var. <i>tenuis</i> (C. Agardh) R.M. Patrick 1939; <i>Diatoma elongatum</i> var. <i>tenuis</i> (C. Agardh) Van Heurck 1885; <i>Odontidium tenue</i> (C. Agardh) Kuntze 1898                                                                                                                                 | + | + | + | + | + |
| <i>Diatoma vulgare</i> Bory 1831                                                        | Syn.: <i>Neodiatoma vulgare</i> (Bory) Kuntze 1891; <i>Odontidium vulgare</i> (Bory) Pfützer 1871                                                                                                                                                                                                                                            | + | + | + | + | - |
| <i>Diatoma vulgare</i> f. <i>breve</i> (Grunow) Bukht. 1995                             | Bas.: <i>Diatoma vulgare</i> var. <i>breve</i> Grunow 1862; Syn.: <i>Odontidium vulgare</i> var. <i>breve</i> (Grunow) Schaar-schmidt 1880; <i>Diatoma vulgare</i> f. <i>brevis</i> (Grunow) Kurz 1922; <i>Odontidium vulgare</i> var. <i>brevis</i> (Grunow) R.M. Patrick 1939; <i>Diatoma vulgare</i> f. <i>brevis</i> (Grunow) Skab. 1960 | + | + | + | + | - |
| <i>Diatoma vulgare</i> f. <i>lineare</i> (Grunow ex Van Heurck) Bukht. 1995             | Bas.: <i>Diatoma vulgare</i> var. <i>linearis</i> Grunow 1881; Syn.:                                                                                                                                                                                                                                                                         | + | + | + | + | + |



| 1                                                                        | 2                                                                                                                                                                                                                                                                                                             | 3 | 4 | 5 | 6 | 7 |
|--------------------------------------------------------------------------|---------------------------------------------------------------------------------------------------------------------------------------------------------------------------------------------------------------------------------------------------------------------------------------------------------------|---|---|---|---|---|
|                                                                          | <i>Odontidium vulgare</i> var. <i>linearis</i> (Grunow) R.M. Patrick 1939; <i>Diatoma vulgare</i> f. <i>linearis</i> (Grunow) Hust. 1957; <i>Diatoma vulgare</i> f. <i>linearis</i> (Grunow) Skab. 1960                                                                                                       |   |   |   |   |   |
| <i>Diatoma vulgare</i> f. <i>subsalina</i> Proschk.-Lavr. 1963           |                                                                                                                                                                                                                                                                                                               | - | + | + | - | - |
| <i>Diatoma vulgare</i> var. <i>productum</i> Grunow 1862                 | Syn.: <i>Odontidium vulgare</i> var. <i>producta</i> (Grunow) Patrick 1939; <i>Diatoma vulgare</i> f. <i>producta</i> (Grunow) Skab. 1960; <i>Diatoma vulgare</i> f. <i>producta</i> (Grunow) Kurz 1922                                                                                                       | - | + | + | + | + |
| <b>Meridion C. Agardh 1824</b>                                           |                                                                                                                                                                                                                                                                                                               |   |   |   |   |   |
| <i>Meridion circulare</i> (Grev.) C. Agardh 1931                         | Bas.: <i>Echinella circularis</i> Grev. 1823; Syn.: <i>Exilaria circularia</i> (Grev.) Grev. 1827; <i>Exilaria circularis</i> (Grev.) C. Agardh 1831                                                                                                                                                          | - | + | - | - | - |
| <i>Meridion circulare</i> f. <i>constrictum</i> (Ralfs) Cleve-Euler 1932 | Bas.: <i>Meridion constrictum</i> Ralfs 1843; Syn.: <i>Meridion circulare</i> var. <i>constrictum</i> (Ralfs) Brun 1880; <i>Meridion circulare</i> var. <i>constricta</i> (Ralfs) Van Heurck 1881                                                                                                             | - | + | - | - | - |
| <b>Synedra Ehrenb. 1830</b>                                              |                                                                                                                                                                                                                                                                                                               |   |   |   |   |   |
| <i>Synedra curvata</i> Proschk.-Lavr. 1951                               |                                                                                                                                                                                                                                                                                                               | - | + | + | + | + |
| <b>Neosynedra D.M. Williams et Round 1986</b>                            |                                                                                                                                                                                                                                                                                                               |   |   |   |   |   |
| <i>Neosynedra delicatissima</i> (Proschk.-Lavr.) Bukht. 2006             | Bas.: <i>Fragilaria delicatissima</i> Proschk.-Lavr. 1960; Syn.: <i>Synedra delicatissima</i> (Proschk.-Lavr.) Gusl.; <i>Neosynedra delicatissima</i> (Proschk.-Lavr.) Gusl. 1992                                                                                                                             | + | - | + | + | + |
| <i>Neosynedra provincialis</i> (Grunow) D.M. Williams et Round 1986      | Bas.: <i>Synedra provincialis</i> Grunow 1877                                                                                                                                                                                                                                                                 | - | - | + | - | - |
| <b>Tabularia (Kütz.) D.M. Williams et Round 1986</b>                     |                                                                                                                                                                                                                                                                                                               |   |   |   |   |   |
| <i>Tabularia fasciculata</i> (C. Agardh) D.M. Williams et Round 1986     | Bas.: <i>Diatoma fasciculata</i> C. Agardh 1812; Syn.: <i>Exilaria fasciculata</i> (C. Agardh) Grev. 1827; <i>Exilaria fasciculata</i> Kütz. 1833; <i>Ctenophora pulchella</i> var. <i>fasciculata</i> (C. Agardh ex specim., Kütz.) Schonf. 1907; <i>Fragilaria fasciculata</i> (C. Agardh) Lange-Bert. 1980 | - | - | + | + | - |
| <i>Tabularia gaillonii</i> (Bory) Bukht. 1995                            | Bas.: <i>Navicula gaillonii</i> Bory 1824; Syn.: <i>Synedra gaillonii</i> (Bory) Ehrenb. 1830;                                                                                                                                                                                                                | + | + | + | + | + |

| 1                                                                                            | 2                                                                                                                                                                                | 3 | 4 | 5 | 6 | 7 |
|----------------------------------------------------------------------------------------------|----------------------------------------------------------------------------------------------------------------------------------------------------------------------------------|---|---|---|---|---|
|                                                                                              | <i>Fragilaria gaillonii</i> (Bory) Lange-Bert. 1980; <i>Catacombas gaillonii</i> (Bory) D.M. Williams et Round 1986                                                              |   |   |   |   |   |
| <i>Tabularia parva</i> (Kütz.) D.M. Williams et Round 1986                                   | Bas.: <i>Synedra parva</i> Kütz. 1849; Syn.: <i>Synedra tabulata</i> var. <i>parva</i> (Kütz.) Hust. 1932, <i>Fragilaria tabulata</i> var. <i>parva</i> (Kütz.) Lange-Bert. 1980 | + | + | + | - | - |
| <i>Tabularia tabulata</i> (C. Agardh) P.J.M. Snoeijs 1992                                    | Bas.: <i>Diatoma tabulatum</i> Agardh 1832; Syn.: <i>Synedra tabulata</i> (C. Agardh) Kütz. 1844; <i>Fragilaria tabulata</i> (C. Agardh) Lange-Bert. 1980                        | + | + | + | + | + |
| <b><i>Opephora</i> P. Petit 1888</b>                                                         |                                                                                                                                                                                  |   |   |   |   |   |
| <i>Opephora</i> cf. <i>gunter-grassii</i> (Witkowski et Lange-Bert.) Sabbe et Vyverman 1995* | Bas.: <i>Fragilaria gunter-grassii</i> Witkowski et Lange-Bert. 1993                                                                                                             | - | - | - | + | - |
| <i>Opephora krumbeinii</i> Witkowski, Witak et Stachura 1999*                                |                                                                                                                                                                                  | - | - | + | + | - |
| <i>Opephora marina</i> (W. Greg.) P. Petit 1888                                              | Bas.: <i>Meridion marinum</i> W. Greg. 1857                                                                                                                                      | + | + | + | + | + |
| <i>Opephora minuta</i> (Cleve-Euler) Witkowski, Lange-Bert. et Metzeltin 2000*               | Bas.: <i>Opephora marina</i> var. <i>minuta</i> Cleve-Euler 1953                                                                                                                 | - | - | - | + | - |
| <i>Opephora mutabilis</i> (Grunow) Sabbe et Vyverman 1995*                                   | Bas.: <i>Sceptroneis mutabilis</i> Grunow ex Cleve et J.D. Möller 1879                                                                                                           | - | - | + | + | - |
| <i>Opephora pacifica</i> (Grunow) P. Petit 1888*                                             | Bas.: <i>Fragilaria pacifica</i> Grunow 1862; Syn.: <i>Sceptroneis pacifica</i> (Grunow) Elmore 1921; <i>Grunoviella pacifica</i> (Grunow) F.W. Mills 1934                       | - | - | + | + | - |
| <b><i>Trachysphenia</i> P. Petit 1877 ex Folin et Perier 1877 #</b>                          |                                                                                                                                                                                  |   |   |   |   |   |
| <i>Trachysphenia acuminata</i> H. Perag. 1911*                                               |                                                                                                                                                                                  | - | - | - | + | + |
| <i>Trachysphenia australis</i> (H.L. Smith) Cleve 1883*                                      | Bas.: <i>Rhaphoneis australis</i> H.L. Smith 1878                                                                                                                                | - | - | - | + | - |
| <b><i>Falcula</i> M. Voigt 1960</b>                                                          |                                                                                                                                                                                  |   |   |   |   |   |
| <i>Falcula media</i> var. <i>subsalina</i> Proschk.-Lavr. 1963                               |                                                                                                                                                                                  | - | - | + | + | + |
| <b><i>Pteroncola</i> R.W. Holmes et Croll 1984</b>                                           |                                                                                                                                                                                  |   |   |   |   |   |
| <i>Pteroncola hyalina</i> (Kütz.) Gusl. 1992                                                 | Bas.: <i>Diatoma hyalinum</i> Kütz. 1844                                                                                                                                         | - | - | + | + | - |
| <b><i>Podocystis</i> J.W. Bailey 1854</b>                                                    |                                                                                                                                                                                  |   |   |   |   |   |
| <i>Podocystis americana</i> J.W. Bailey 1851                                                 |                                                                                                                                                                                  | - | - | - | + | - |
| <b><i>Ulnaria</i> (Kütz.) Compère 2001</b>                                                   |                                                                                                                                                                                  |   |   |   |   |   |
| <i>Ulnaria acus</i> (Kütz.) Aboal 2003                                                       | Bas.: <i>Synedra acus</i> Kütz. 1844; Syn.: <i>Fragilaria ulna</i> var. <i>acus</i> (Kütz.) Lange-Bert. 1980                                                                     | - | + | - | - | - |
| <i>Ulnaria biceps</i> (Nitzsch) Compère 2001                                                 | Bas.: <i>Synedra biceps</i> Kütz.                                                                                                                                                | - | + | - | - | - |

| 1                                                                                                              | 2                                                                                                                                                                                                                                                                                                     | 3 | 4 | 5 | 6 | 7 |
|----------------------------------------------------------------------------------------------------------------|-------------------------------------------------------------------------------------------------------------------------------------------------------------------------------------------------------------------------------------------------------------------------------------------------------|---|---|---|---|---|
|                                                                                                                | 1844; Syn.: <i>Synedra ulna</i> var. <i>biceps</i> (Kütz.) Schonfeldt<br>1913; <i>Synedra ulna</i> f. <i>biceps</i> (Kütz.) Hust. 1957; <i>Synedra ulna</i> f. <i>biceps</i> (Kütz.) Skab. 1960                                                                                                       |   |   |   |   |   |
| <i>Ulnaria contracta</i> (Østrup) E. Morales et M.L. Vis 2007                                                  | Bas.: <i>Synedra ulna</i> var. <i>contracta</i> Østrup 1901; Syn: <i>Fragilaria ulna</i> var. <i>contracta</i> (Østrup) Main 1988                                                                                                                                                                     | - | + | - | - | - |
| <i>Ulnaria delicatissima</i> (Grunow) Aboal et P.C. Silva 2004                                                 | Bas.: <i>Synedra delicatissima</i> Grunow ex Van Heurck 1881; Syn.: <i>Synedra acus</i> var. <i>angustissima</i> (Grunow) Krieger 1927; <i>Fragilaria delicatissima</i> var. <i>angustissima</i> (Grunow) Lange-Bert. 1980; <i>Ulnaria delicatissima</i> var. <i>angustissima</i> (Grunow) Aboal 2003 | - | + | - | - | - |
| <i>Ulnaria ulna</i> (Nitzsch) Compère 2001                                                                     | Bas.: <i>Bacillaria ulna</i> Nitzsch 1817; Syn.: <i>Synedra ulna</i> (Nitzsch) Ehrenb. 1832; <i>Frustulia ulna</i> (Nitzsch) Agardh 1831; <i>Fragilaria ulna</i> (Nitzsch) Lange-Bert. 1980                                                                                                           | - | + | + | + | - |
| <b>LICMOPHORALES Round 1990</b><br><b>Licmophoraceae Kütz. 1844</b><br><b><i>Licmophora</i> C. Agardh 1827</b> |                                                                                                                                                                                                                                                                                                       |   |   |   |   |   |
| <i>Licmophora abbreviata</i> C. Agardh 1831                                                                    |                                                                                                                                                                                                                                                                                                       | + | + | + | + | + |
| <i>Licmophora abbreviata</i> C. Agardh f. <i>rostrata</i> (Mereschk.) Proschk.-Lavr. 1963                      | Bas.: <i>Licmophora rostrata</i> Mereschk. 1902                                                                                                                                                                                                                                                       | - | - | - | + | - |
| <i>Licmophora communis</i> (Heib.) Grunow 1881                                                                 | Bas.: <i>Podosphenia communis</i> Heiberg 1863                                                                                                                                                                                                                                                        | - | - | + | + | - |
| <i>Licmophora dalmatica</i> (Kütz.) Grunow 1867                                                                | Bas.: <i>Rhipidophora dalmatica</i> Kütz. 1844; Syn.: <i>Podosphenia dalmatica</i> (Kütz.) Rabenh. 1864                                                                                                                                                                                               | + | - | + | + | + |
| <i>Licmophora debilis</i> (Kütz.) Grunow 1881                                                                  | Bas.: <i>Podosphenia debilis</i> Kütz. 1844                                                                                                                                                                                                                                                           | - | - | + | - | - |
| <i>Licmophora ehrenbergii</i> (Kütz.) Grunow 1867                                                              | Bas.: <i>Podosphenia ehrenbergii</i> Kütz. 1844                                                                                                                                                                                                                                                       | + | + | + | + | + |
| <i>Licmophora ehrenbergii</i> var. <i>ovata</i> (W. Sm.) Van Heurck 1896                                       | Bas.: <i>Podosphenia ovata</i> W. Sm. 1853, Syn.: <i>Licmophora ovata</i> (W. Sm.) Grunow 1867                                                                                                                                                                                                        | + | - | - | - | - |
| <i>Licmophora flabellata</i> (Carmichael ex Grev.) C. Agardh emend Sar et Ferrario 1990                        | Bas.: <i>Exilaria flabellata</i> Ehrenb. 1832; Syn.: <i>Exilaria flabellata</i> Grev. 1827, <i>Echinella flabellata</i> Carmichael mscr. 1826 accord. to C. Agardh,                                                                                                                                   | + | + | + | + | + |

| 1                                                                                       | 2                                                                                                                                                                                                                                                                                               | 3 | 4 | 5 | 6 | 7 |
|-----------------------------------------------------------------------------------------|-------------------------------------------------------------------------------------------------------------------------------------------------------------------------------------------------------------------------------------------------------------------------------------------------|---|---|---|---|---|
|                                                                                         | <i>Licmophora flabellata</i> (Grev.)<br>C. Agardh 1831                                                                                                                                                                                                                                          |   |   |   |   |   |
| <i>Licmophora gracilis</i> (Ehrenb.) Grunow 1867                                        | Bas.: <i>Podosphenia gracilis</i><br>Ehrenb. 1838                                                                                                                                                                                                                                               | + | + | + | + | + |
| <i>Licmophora gracilis</i> var. <i>anglica</i> (Kütz.) H. Perag. 1901                   | Bas.: <i>Rhipidophora anglica</i><br>Kütz. 1844; Syn.: <i>Licmophora</i><br><i>anglica</i> (Kütz.) Grunow ex<br>Van Heurck 1881                                                                                                                                                                 | + | + | + | + | + |
| <i>Licmophora grandis</i> (Kütz.) Grunow ex Van Heurck<br>1881                          | Bas.: <i>Rhipidophora grandis</i><br>Kütz. 1844; Syn.: <i>Licmophora</i><br><i>gracilis</i> f. <i>grandis</i> (Kütz.)<br>Grunow 1867                                                                                                                                                            | - | - | + | + | + |
| <i>Licmophora hastata</i> Mereschk. 1901                                                |                                                                                                                                                                                                                                                                                                 | - | + | + | + | + |
| <i>Licmophora hastata</i> f. <i>clavata</i> Proschk.-Lavr. 1963                         | Bas.: <i>Licmophora hastata</i> var.<br><i>clavata</i> Mereschk. 1901                                                                                                                                                                                                                           | - | + | + | - | - |
| <i>Licmophora juergensii</i> C. Agardh 1831                                             |                                                                                                                                                                                                                                                                                                 | + | - | - | - | - |
| <i>Licmophora nubecula</i> (Kütz.) Grunow 1878                                          | Bas.: <i>Rhipidophora nubecula</i><br>Kütz. 1844; Syn.: <i>Podosphenia</i><br><i>nubecula</i> (Kütz.) Rabenh.<br>1864; <i>Licmophora paradoxa</i><br>var. <i>nubecula</i> (Kütz.)<br>Grunow ex Van Heurck<br>1881; <i>Licmophora tincta</i> var.<br><i>nubecula</i> (Kütz.) Cleve-Euler<br>1953 | - | - | + | + | + |
| <i>Licmophora oedipus</i> (Kütz.) Grunow ex Van Heurck<br>1881                          | Bas.: <i>Rhipidophora oedipus</i><br>Kütz. 1844; Syn.:<br><i>Rhipidophora dalmatica</i> var.<br><i>oedipus</i> (Kütz.) Grunow<br>1862; <i>Podosphenia oedipus</i><br>(Kütz.) Rabenh. 1864;<br><i>Licmophora juergensii</i> var.<br><i>oedipus</i> (Kütz.) H. Perag. et<br>Perag. 1901           | - | - | + | + | - |
| <i>Licmophora ovulum</i> Mereschk. 1902                                                 |                                                                                                                                                                                                                                                                                                 | - | - | + | + | + |
| <i>Licmophora paradoxa</i> (Lyngb.) C. Agardh 1828-1836                                 | Bas.: <i>Echinella paradoxa</i><br>Lyngb. 1819                                                                                                                                                                                                                                                  | + | + | + | + | - |
| <i>Licmophora paradoxa</i> var. <i>crystallina</i> (Kütz.) Grunow ex<br>Van Heurck 1881 | Bas.: <i>Rhipidophora crystallina</i><br>Kütz. 1844; Syn.: <i>Podosphenia</i><br><i>crystallina</i> (Kütz.) Rabenh.<br>1864; <i>Licmophora crystallina</i><br>(Kütz.) Grunow ex Van<br>Heurck 1881                                                                                              | + | - | - | - | - |
| <i>Licmophora paradoxa</i> var. <i>tincta</i> (C. Agardh) Hust. 1931                    | Bas.: <i>Gomphonema tinctum</i> C.<br>Agardh 1831; Syn.:<br><i>Rhipidophora tincta</i> (C.<br>Agardh) Ralfs ex A. Pritch.<br>1861; <i>Licmophora tincta</i> (C.<br>Agardh) Grunow 1867                                                                                                          | + | - | - | + | - |
| <i>Licmophora reichardtii</i> Grunow ex Van Heurck 1881                                 |                                                                                                                                                                                                                                                                                                 | + | - | - | - | - |

| 1                                                                                                                              | 2                                                                                                                                                                                                                                                                               | 3 | 4 | 5 | 6 | 7 |
|--------------------------------------------------------------------------------------------------------------------------------|---------------------------------------------------------------------------------------------------------------------------------------------------------------------------------------------------------------------------------------------------------------------------------|---|---|---|---|---|
| <b>RHAPHONEIDALES Round 1990</b><br><b>Rhaphoneidaceae Forti 1912</b><br><b>Rhaphoneis Ehrenb. 1844</b>                        |                                                                                                                                                                                                                                                                                 |   |   |   |   |   |
| <i>Rhaphoneis ampiceros</i> Ehrenb. 1844                                                                                       | Bas.: <i>Cocconeis ampiceros</i><br>Ehrenb. 1840                                                                                                                                                                                                                                | - | - | - | + | + |
| <i>Rhaphoneis</i> sp.1                                                                                                         |                                                                                                                                                                                                                                                                                 | - | - | + | + | - |
| <b>Delphineis G.W. Andrews 1977</b>                                                                                            |                                                                                                                                                                                                                                                                                 |   |   |   |   |   |
| <i>Delphineis minutissima</i> (Hust.) Simonsen 1987*                                                                           | Bas.: <i>Rhaphoneis minutissima</i><br>Hust. 1939                                                                                                                                                                                                                               | - | - | + | + | - |
| <i>Delphineis surirella</i> (Ehrenb.) G.W. Andrews 1981                                                                        | Bas.: <i>Zygoceros surirella</i><br>Ehrenb. 1840; Syn.:<br><i>Biddulphia surirella</i> (Ehrenb.)<br>Rabenh. 1864; <i>Rhaphoneis</i><br><i>surirella</i> (Ehrenb.) Grunow<br>ex Cleve et J.D. Möller 1878;<br><i>Dimeregramma surirella</i><br>(Ehrenb.) Grunow ex Cleve<br>1878 | - | - | - | + | + |
| <i>Delphineis surirelloides</i> (Simonsen) Andrews 1980                                                                        | Bas.: <i>Rhaphoneis surirelloides</i><br>Simonsen 1974                                                                                                                                                                                                                          | - | - | - | + | - |
| <b>Psammodiscaceae Round et D.G. Mann 1980</b><br><b>Psammodiscus Round et D.G. Mann 1980</b>                                  |                                                                                                                                                                                                                                                                                 |   |   |   |   |   |
| <i>Psammodiscus nitidus</i> (W. Greg.) Round et D.G. Mann 1980                                                                 | Bas.: <i>Coscinodiscus nitidus</i><br>(W. Greg.) 1857                                                                                                                                                                                                                           | + | + | + | + | + |
| <b>ARDISSONEALES Round 1990</b><br><b>Ardissoneaceae Round 1990</b><br><b>Ardissonea De Not. ex De Not. et Bagl. 1870</b>      |                                                                                                                                                                                                                                                                                 |   |   |   |   |   |
| <i>Ardissonea baculus</i> (W. Greg.) Grunow 1880                                                                               | Bas.: <i>Synedra baculus</i> W.<br>Greg. 1857                                                                                                                                                                                                                                   | + | + | + | + | + |
| <i>Ardissonea crystallina</i> (C. Agardh) Grunow 1880                                                                          | Bas.: <i>Diatoma crystallinum</i> C.<br>Agardh 1824; Syn.: <i>Synedra</i><br><i>crystallina</i> (C. Agardh) Kütz.<br>1844                                                                                                                                                       | + | + | + | + | + |
| <i>Ardissonea robusta</i> (Ralfs) De Notaris 1871                                                                              | Bas.: <i>Synedra robusta</i> Ralfs ex<br>A. Pritch. 1861; Syn.: <i>Synedra</i><br><i>superba</i> var. <i>robusta</i> (Ralfs)<br>Grunow 1862                                                                                                                                     | - | - | - | + | - |
| <b>TOXARIALES Round 1990</b><br><b>Toxariaceae Round 1990</b><br><b>Toxarium J.W. Bailey 1854</b>                              |                                                                                                                                                                                                                                                                                 |   |   |   |   |   |
| <i>Toxarium undulatum</i> J.W. Bailey 1854                                                                                     | Syn.: <i>Synedra undulata</i> (J.W.<br>Bailey) W. Sm. 1856                                                                                                                                                                                                                      | - | + | + | + | + |
| <b>THALASSIONEMATALES Round 1990</b><br><b>Thalassionemataceae Round 1990</b><br><b>Thalassionema Grunow ex Mereschk. 1902</b> |                                                                                                                                                                                                                                                                                 |   |   |   |   |   |
| <i>Thalassionema nitzschioides</i> (Grunow) Mereschk. 1902                                                                     | Bas.: <i>Synedra nitzschioides</i><br>Grunow 1862; Syn.:<br><i>Thalassiothrix nitzschioides</i><br>(Grunow) Grunow ex Van<br>Heurck 1881                                                                                                                                        | - | + | + | + | + |

| 1                                                                                                                                                  | 2                                                                                                                                                                                                                                     | 3 | 4 | 5 | 6 | 7 |
|----------------------------------------------------------------------------------------------------------------------------------------------------|---------------------------------------------------------------------------------------------------------------------------------------------------------------------------------------------------------------------------------------|---|---|---|---|---|
| <b>RHABDONEMATATALES Round et R.M. Crawford 1990</b><br><b>Rhabdonemataceae Round et R.M. Crawford 1990</b><br><b><i>Rhabdonema</i> Kütz. 1844</b> |                                                                                                                                                                                                                                       |   |   |   |   |   |
| <i>Rhabdonema adriaticum</i> Kütz. 1844                                                                                                            | Syn.: <i>Tessella adriatica</i> A. Mann 1907                                                                                                                                                                                          | + | + | + | + | + |
| <i>Rhabdonema arcuatum</i> (Lyngb.) Kütz. 1844                                                                                                     |                                                                                                                                                                                                                                       | - | - | + | + | - |
| <i>Rhabdonema arcuatum</i> var. <i>ventricosa</i> Cleve 1873                                                                                       |                                                                                                                                                                                                                                       | - | - | + | - | - |
| <i>Rhabdonema minutum</i> Kütz. 1844                                                                                                               |                                                                                                                                                                                                                                       | - | - | - | + | - |
| <b>STRIATELLALES Round 1990</b><br><b>Striatellaceae Kütz. 1844</b><br><b><i>Striatella</i> C. Agardh 1832</b>                                     |                                                                                                                                                                                                                                       |   |   |   |   |   |
| <i>Striatella unipunctata</i> (Lyngb.) C. Agardh 1832                                                                                              | Bas.: <i>Fragilaria unipunctata</i> Lyngb. 1819; Syn.: <i>Diatoma unipunctatum</i> (Lyngb.) C. Agardh 1824, <i>Candollella unipunctata</i> (Lyngb.) Gaillon 1833                                                                      | + | + | + | + | + |
| <b><i>Hyalosira</i> Kütz. 1844</b>                                                                                                                 |                                                                                                                                                                                                                                       |   |   |   |   |   |
| <i>Hyalosira aberrans</i> (Giffen) J.N. Navarro 1991*                                                                                              | Bas.: <i>Striatella aberrans</i> Giffen 1976                                                                                                                                                                                          | - | - | + | + | - |
| <i>Hyalosira interrupta</i> (Ehrenb.) J.N. Navarro 1991                                                                                            | Bas.: <i>Tessella interrupta</i> Ehrenb. 1838; Syn.: <i>Striatella interrupta</i> (Ehrenb.) Heiberg 1862, <i>Microtabella interrupta</i> (Ehrenb.) Round 1990                                                                         | - | + | + | + | + |
| <b><i>Microtabella</i> Round ex Round et al. 1990</b>                                                                                              |                                                                                                                                                                                                                                       |   |   |   |   |   |
| <i>Microtabella delicatula</i> (Kütz.) Round 1990                                                                                                  | Bas.: <i>Hyalosira delicatula</i> Kütz. 1844, Syn.: <i>Striatella delicatula</i> (Kütz.) Grunow 1881                                                                                                                                  | - | + | + | + | + |
| <b><i>Grammatophora</i> Ehrenb. 1840</b>                                                                                                           |                                                                                                                                                                                                                                       |   |   |   |   |   |
| <i>Grammatophora angulosa</i> Ehrenb. 1840                                                                                                         |                                                                                                                                                                                                                                       | + | - | + | + | + |
| <i>Grammatophora angulosa</i> var. <i>islandica</i> (Ehrenb.) Grunow 1881                                                                          | Bas.: <i>Grammatophora islandica</i> Ehrenb. 1843                                                                                                                                                                                     | + | - | - | - | - |
| <i>Grammatophora hamulifera</i> Kütz. 1844                                                                                                         | Syn.: <i>Grammatophora angulosa</i> var. <i>hamulifera</i> (Kütz.) Grunow 1862; <i>Grammatophora hamulifera</i> var. <i>uncina</i> (Kütz.) Grunow 1881; <i>Grammatophora islandica</i> var. <i>hamulifera</i> (Kütz.) Lagerstedt 1876 | + | - | - | - | - |
| <i>Grammatophora marina</i> (Lyngb.) Kütz. 1844                                                                                                    | Bas.: <i>Diatoma marinum</i> Lyngb. 1819                                                                                                                                                                                              | + | + | + | + | + |
| <i>Grammatophora oceanica</i> Ehrenb. 1840                                                                                                         |                                                                                                                                                                                                                                       | + | + | + | + | + |
| <i>Grammatophora serpentina</i> (Ralfs) Ehrenb. 1844                                                                                               | Bas.: <i>Striatella taeniaeformis</i> var. <i>serpentina</i> Ralfs 1843                                                                                                                                                               | + | + | + | + | + |
| <b>CLIMACOSPHEANIALES Round 1990</b><br><b>Climacospheniaceae Round 1990</b><br><b><i>Climacosphenia</i> Ehrenb. 1843</b>                          |                                                                                                                                                                                                                                       |   |   |   |   |   |

| 1                                                                                             | 2                                                                                                                                                                                                                                                            | 3 | 4 | 5 | 6 | 7 |
|-----------------------------------------------------------------------------------------------|--------------------------------------------------------------------------------------------------------------------------------------------------------------------------------------------------------------------------------------------------------------|---|---|---|---|---|
| <i>Climacosphenia moniligera</i> Ehrenb. 1843                                                 |                                                                                                                                                                                                                                                              | + | - | + | - | - |
| <b>BACILLARIOPHYCEAE</b>                                                                      |                                                                                                                                                                                                                                                              |   |   |   |   |   |
| <b>EUNOTIALES P.C. Silva 1962</b>                                                             |                                                                                                                                                                                                                                                              |   |   |   |   |   |
| <b>Eunotiaceae Kütz. 1844</b>                                                                 |                                                                                                                                                                                                                                                              |   |   |   |   |   |
| <b><i>Eunotia</i> Ehrenb. 1837</b>                                                            |                                                                                                                                                                                                                                                              |   |   |   |   |   |
| <i>Eunotia</i> sp.1                                                                           |                                                                                                                                                                                                                                                              | - | - | + | + | - |
| <b>LYRELLALES D.G. Mann 1990</b>                                                              |                                                                                                                                                                                                                                                              |   |   |   |   |   |
| <b>Lyrellaceae D.G. Mann 1990</b>                                                             |                                                                                                                                                                                                                                                              |   |   |   |   |   |
| <b><i>Lyrella</i> Karayeva 1978</b>                                                           |                                                                                                                                                                                                                                                              |   |   |   |   |   |
| <i>Lyrella abrupta</i> (W. Greg.) D.G. Mann 1990                                              | Bas.: <i>Navicula lyra</i> var. <i>abrupta</i> W. Greg. 1857; Syn.: <i>Navicula abrupta</i> Donkin 1870; <i>Lyrella abrupta</i> (Donkin) Gusl. et Karayeva ex Gusl. et al. 1992 (nom. inv.)                                                                  | + | + | + | + | + |
| <i>Lyrella abruptapontica</i> Nevrova, Witkowski, Kulikovskiy et Lange-Bert. 2013**           |                                                                                                                                                                                                                                                              | - | - | - | + | - |
| <i>Lyrella aestimata</i> (Hust.) Nevrova, Kulikovskiy, Witkowski et Lange-Bert. 2013*         | Bas.: <i>Navicula aestimata</i> Hust. 1961                                                                                                                                                                                                                   | - | - | - | + | - |
| <i>Lyrella approximata</i> (Grev.) D.G. Mann 1990                                             | Bas.: <i>Navicula approximata</i> Grev. 1859; Syn.: <i>Navicula lyra</i> var. <i>approximata</i> (Grev.) Cleve 1878                                                                                                                                          | + | - | - | - | - |
| <i>Lyrella atlantica</i> (A.W.F. Schmidt) D.G. Mann 1990                                      | Bas.: <i>Navicula lyra</i> var. <i>atlantica</i> A.W.F. Schmidt 1874; Syn.: <i>Navicula atlantica</i> (A.W.F. Schmidt) H. Perag. et Perag. 1897                                                                                                              | - | + | + | + | + |
| <i>Lyrella barbara</i> (Heiden) D.G. Mann 1990*                                               | Bas.: <i>Navicula barbara</i> Heiden 1928                                                                                                                                                                                                                    | - | - | - | + | - |
| <i>Lyrella circumsecta</i> (Grunow ex A.W.F. Schmidt) D.G. Mann 1990                          | Bas.: <i>Navicula polysticta</i> var. <i>circumsecta</i> Grunow ex A.W.F. Schmidt et al. 1874; Syn.: <i>Navicula circumsecta</i> (Grunow ex A.W.F. Schmidt et al.) Grunow 1880                                                                               | - | - | + | - | - |
| <i>Lyrella clavata</i> (W. Greg.) D.G. Mann 1990                                              | Bas.: <i>Navicula clavata</i> W. Greg. 1856; Syn.: <i>Navicula hennedyi</i> var. <i>clavata</i> (W. Greg.) Van Heurck 1885                                                                                                                                   | - | + | + | + | - |
| <i>Lyrella clavata</i> f. <i>elongata</i> (H. Perag.) Ryabushko 2006                          | Bas.: <i>Navicula clavata</i> f. <i>elongata</i> H. Peragallo 1897-1908                                                                                                                                                                                      | + | - | - | - | - |
| <i>Lyrella dilatata</i> (A.W.F. Schmidt) Nevrova, Witkowski, Kulikovskiy et Lange-Bert. 2013* | Bas.: <i>Navicula lyra</i> var. <i>dilatata</i> A.W.F. Schmidt 1874; Syn.: <i>Navicula lyra</i> var. <i>dilatata</i> H. Perag. et Perag. 1897; <i>Navicula lyra</i> f. <i>dilatata</i> Tempère et Perag. 1912 as <i>Navicula lyra</i> var. <i>intermedia</i> | - | - | - | + | - |

| 1                                                                              | 2                                                                                                                                                                                                                                                                                                                                                                                                                                                                                                                                                                                                                                                                                             | 3 | 4 | 5 | 6 | 7 |
|--------------------------------------------------------------------------------|-----------------------------------------------------------------------------------------------------------------------------------------------------------------------------------------------------------------------------------------------------------------------------------------------------------------------------------------------------------------------------------------------------------------------------------------------------------------------------------------------------------------------------------------------------------------------------------------------------------------------------------------------------------------------------------------------|---|---|---|---|---|
|                                                                                | <i>f. dilatata</i>                                                                                                                                                                                                                                                                                                                                                                                                                                                                                                                                                                                                                                                                            |   |   |   |   |   |
| <i>Lyrella fogedii</i> Witkowski, Lange-Bert. et Metzeltin 2000*               | Syn.: <i>Navicula aestimata</i> Hust. sensu Foged 1975                                                                                                                                                                                                                                                                                                                                                                                                                                                                                                                                                                                                                                        | - | - | - | + | - |
| <i>Lyrella hennedyi</i> (W. Sm.) A. Stickle et D.G. Mann 1990                  | Bas.: <i>Navicula hennedyi</i> W. Sm. 1856                                                                                                                                                                                                                                                                                                                                                                                                                                                                                                                                                                                                                                                    | + | + | + | + | + |
| <i>Lyrella hennedyi</i> f. <i>cuneata</i> (A.W.F. Schmidt) Ryabushko 2006      | Bas.: <i>Navicula hennedyi</i> var. <i>cuneata</i> A.W.F. Schmidt 1874; Syn.: <i>Navicula hennedyi</i> f. <i>cuneata</i> (A.W.F. Schmidt) Hust. 1961-1966                                                                                                                                                                                                                                                                                                                                                                                                                                                                                                                                     | + | - | - | - | - |
| <i>Lyrella hennedyi</i> var. <i>neapolitana</i> (Cleve) Ryabushko 2006         | Bas.: <i>Navicula hennedyi</i> var. <i>neapolitana</i> Cleve; Syn.: <i>Lyrella hennedyi</i> var. <i>neapolitana</i> (Cleve) Gusl. et Karayeva 2002                                                                                                                                                                                                                                                                                                                                                                                                                                                                                                                                            | + | - | + | - | + |
| <i>Lyrella karayevae</i> Nevrova, Witkowski, Kulikovskiy et Lange-Bert. 2013** |                                                                                                                                                                                                                                                                                                                                                                                                                                                                                                                                                                                                                                                                                               | - | - | + | + | - |
| <i>Lyrella lyra</i> (Ehrenb.) Karayeva 1978                                    | Bas.: <i>Navicula lyra</i> Ehrenb. 1841; Syn.: <i>Navicula lyra</i> var. <i>ehrenbergii</i> Cleve 1895; <i>Navicula lyra</i> f. <i>typica</i> Hust. ex A.W.F. Schmidt et al. 1874–1959; <i>Lyrella lyra</i> var. <i>ehrenbergii</i> (Cleve) Gusl. et Karayeva 2002 (nom. inv.); <i>Lyrella lyra</i> f. <i>typica</i> (Hust.) Ryabushko 2006 (nom. inv.)                                                                                                                                                                                                                                                                                                                                       | + | + | + | + | + |
| <i>Lyrella lyroides</i> (Hendey) D.G. Mann 1990                                | Bas.: <i>Navicula lyroides</i> Hendey 1958; Syn.: <i>Navicula lyra</i> var. <i>elliptica</i> A.W.F. Schmidt 1874a, non A. Schmidt 1874–1950 nec H. Perag. et Perag. 1897–1908 nec Hendey 1951 nec Cleve-Euler 1953; <i>Navicula elliptica</i> W. Sm. 1853 (pro parte); <i>Navicula lyra</i> var. <i>intermedia</i> H. Perag. et Perag. 1897–1908; <i>Navicula lyra</i> var. <i>intermedia</i> A.W.F. Schmidt 1874–1950; <i>Navicula robertsiana</i> var. <i>recta</i> Amossé 1924; <i>Navicula lyra</i> (Ehrenb.) Brockmann 1950; <i>Lyrella lyra</i> var. <i>elliptica</i> (A.W.F. Schmidt) Gusl. et Karayeva 1992 (nom. inv.); <i>Lyrella lyroides</i> (Hendey) Ryabushko 1991 (comb. inv.) | + | + | + | + | + |
| <i>Lyrella majuscula</i> (Hust.) Witkowski ex Moser et al. 1998*               | Bas.: <i>Navicula majuscula</i> Hust. 1961-1966                                                                                                                                                                                                                                                                                                                                                                                                                                                                                                                                                                                                                                               | - | - | - | + | + |



| 1                                                                                     | 2                                                                                                                       | 3 | 4 | 5 | 6 | 7 |
|---------------------------------------------------------------------------------------|-------------------------------------------------------------------------------------------------------------------------|---|---|---|---|---|
| <i>Lyrella nebulosa</i> (W. Greg.) D.G. Mann 1990                                     | Bas.: <i>Navicula nebulosa</i> W. Greg. 1857; Syn.: <i>Navicula hennedyi</i> var. <i>nebulosa</i> (W. Greg.) Cleve 1895 | - | - | - | + | + |
| <i>Lyrella perplexa</i> (H. Perag. et Perag.) Ryabushko 2006                          | Bas.: <i>Navicula perplexa</i> H. et M. Peragallo 1897-1908                                                             | - | - | + | - | - |
| <i>Lyrella pontieuxini</i> Nevrova, Witkowski, Kulikovskiy et Lange-Bert. 2013**      |                                                                                                                         | - | - | - | + | - |
| <i>Lyrella pseudolyra</i> Nevrova, Witkowski, Kulikovskiy et Lange-Bert. 2013**       |                                                                                                                         | - | - | - | + | - |
| <i>Lyrella rudiformis</i> (Hust.) Nevrova, Witkowski, Kulikovskiy et Lange-Bert. 2013 | Bas.: <i>Navicula rudiformis</i> Hust. 1964, Syn.: <i>Lyrella rudiformis</i> (Hust.) Gusl. et Karayeva 1992 (nom. inv.) | - | - | + | + | - |
| <i>Lyrella ruppelii</i> Nevrova, Witkowski, Kulikovskiy et Lange-Bert. 2013**         |                                                                                                                         | - | - | + | - | - |
| <i>Lyrella spectabilis</i> (W. Greg.) D.G. Mann 1990                                  | Bas.: <i>Navicula spectabilis</i> W. Greg. 1857                                                                         | + | + | + | + | + |
| <i>Lyrella septata</i> (Proschk.-Lavr.) Gusl. et Karayeva 2002 nom. inv.              | Bas.: <i>Navicula septata</i> Proschk.-Lavr. 1963; repl. name: <i>Navicula septifera</i> Proschk.-Lavr. 1967            | - | - | + | - | - |
| <i>Lyrella</i> sp.1B                                                                  |                                                                                                                         | - | - | - | + | - |
| <b><i>Petroneis</i> A. Stickle et D.G. Mann ex Round et al. 1990</b>                  |                                                                                                                         |   |   |   |   |   |
| <i>Petroneis humerosa</i> (Bréb. ex W. Sm.) A. Stickle et D.G. Mann 1990              | Bas.: <i>Navicula humerosa</i> Bréb. 1956                                                                               | + | + | + | + | + |
| <b>MASTOGLOIALES D.G. Mann 1990</b>                                                   |                                                                                                                         |   |   |   |   |   |
| <b>Mastogloiaceae Mereschk. 1903</b>                                                  |                                                                                                                         |   |   |   |   |   |
| <b><i>Aneumastus</i> (Ehrenb.) D.G. Mann et A. Stickle 1990</b>                       |                                                                                                                         |   |   |   |   |   |
| <i>Aneumastus</i> sp.1                                                                |                                                                                                                         | - | - | - | + | - |
| <b><i>Mastogloia</i> Thw. ex W. Sm. 1856</b>                                          |                                                                                                                         |   |   |   |   |   |
| <i>Mastogloia adriatica</i> M. Voigt 1963*                                            |                                                                                                                         | - | - | - | + | - |
| <i>Mastogloia angulata</i> F.W. Lewis 1861                                            |                                                                                                                         | - | + | + | + | + |
| <i>Mastogloia apiculata</i> W. Sm. 1856                                               |                                                                                                                         | - | - | - | - | + |
| <i>Mastogloia baldjikiana</i> Grunow 1893                                             |                                                                                                                         | - | - | + | + | + |
| <i>Mastogloia binotata</i> (Grunow) Cleve 1895                                        | Bas.: <i>Cocconeis binotata</i> Grunow 1863                                                                             | - | + | + | + | + |
| <i>Mastogloia biocellata</i> (Grunow) Novarino et Muftah 1991                         | Bas.: <i>Mastogloia erythraea</i> var. <i>biocellata</i> Grunow 1877                                                    | - | - | + | + | + |
| <i>Mastogloia braunii</i> Grunow 1863                                                 |                                                                                                                         | - | + | + | + | + |
| <i>Mastogloia crucicula</i> (Grunow) Cleve 1895                                       | Bas.: <i>Orthonais crucicula</i> Grunow 1877                                                                            | - | - | + | + | - |
| <i>Mastogloia cuneata</i> (Meister) Simonsen 1990*                                    | Bas.: <i>Mastogloia gomphonemoides</i> var. <i>cuneata</i> Meister 1937                                                 | - | - | - | + | - |
| <i>Mastogloia erythraea</i> Grunow 1860                                               |                                                                                                                         | - | - | + | + | + |
| <i>Mastogloia exigua</i> F.W. Lewis 1861                                              |                                                                                                                         | - | - | - | + | - |
| <i>Mastogloia ignorata</i> Hust. 1933                                                 |                                                                                                                         | - | - | - | + | - |
| <i>Mastogloia labuensis</i> Cleve 1893                                                |                                                                                                                         | - | - | + | + | + |
| <i>Mastogloia lanceolata</i> Thwaites ex W. Sm. 1856                                  |                                                                                                                         | - | - | + | + | + |

| 1                                                                         | 2                                                                                                                                                                                         | 3 | 4 | 5 | 6 | 7 |
|---------------------------------------------------------------------------|-------------------------------------------------------------------------------------------------------------------------------------------------------------------------------------------|---|---|---|---|---|
| <i>Mastogloia lanceolata</i> f. <i>radiolata</i> Proschk.-Lavr. 1963      |                                                                                                                                                                                           | - | - | - | - | + |
| <i>Mastogloia lanceolata</i> var. <i>subelliptica</i> Proschk.-Lavr. 1963 |                                                                                                                                                                                           | - | - | - | - | + |
| <i>Mastogloia lineata</i> Cleve et Grove 1891                             |                                                                                                                                                                                           | - | - | - | + | - |
| <i>Mastogloia ovulum</i> Hust. 1933                                       |                                                                                                                                                                                           | - | - | + | + | - |
| <i>Mastogloia paradoxa</i> Grunow 1895                                    |                                                                                                                                                                                           | - | + | + | + | + |
| <i>Mastogloia paradoxa</i> var. <i>tenera</i> Proschk.-Lavr. 1963         |                                                                                                                                                                                           | - | - | - | + | + |
| <i>Mastogloia pumila</i> (Cleve et J.D. Möller) Cleve 1895                | Bas.: <i>Mastogloia braunii</i> var. <i>pumila</i> Grunow 1953                                                                                                                            | - | - | + | + | + |
| <i>Mastogloia pusilla</i> Grunow 1878                                     |                                                                                                                                                                                           | + | + | + | + | + |
| <i>Mastogloia pusilla</i> var. <i>linearis</i> Østrup 1910                |                                                                                                                                                                                           | + | - | - | + | + |
| <i>Mastogloia exigua</i> var. <i>subcapitata</i> (Hust.) Cleve-Euler 1953 | Bas.: <i>Mastogloia pusilla</i> var. <i>subcapitata</i> Hust. 1933                                                                                                                        | - | - | - | - | + |
| <i>Mastogloia pusilla</i> var. <i>subrhombica</i> Proschk.-Lavr. 1963     |                                                                                                                                                                                           | - | - | + | + | + |
| <i>Mastogloia rostrata</i> (Wallich) Hust. 1933                           | Bas.: <i>Stigmaphora rostrata</i> Wallich 1860                                                                                                                                            | - | - | - | + | - |
| <i>Mastogloia smithii</i> Thwaites 1856                                   |                                                                                                                                                                                           | + | + | + | + | + |
| <i>Mastogloia smithii</i> var. <i>amphicephala</i> Grunow 1880            |                                                                                                                                                                                           | - | - | - | + | - |
| <i>Mastogloia splendida</i> (W. Greg.) Cleve et J.D. Möller 1879          | Bas.: <i>Cocconeis splendida</i> W. Greg. 1857; Syn.: <i>Mastogloia splendida</i> (W. Greg.) H. Perag. 1888                                                                               | - | - | - | + | + |
| <i>Mastogloia tenera</i> Hust. 1933                                       |                                                                                                                                                                                           | - | - | + | + | - |
| <i>Mastogloia</i> sp.1                                                    |                                                                                                                                                                                           | - | - | - | + | + |
| <i>Mastogloia</i> sp.3                                                    |                                                                                                                                                                                           | - | - | - | + | - |
| <b>CYMBELLALES D.G. Mann 1990</b>                                         |                                                                                                                                                                                           |   |   |   |   |   |
| <b>Rhoicospheniaceae J.Y. Chen et H.Z. Zhu 1983</b>                       |                                                                                                                                                                                           |   |   |   |   |   |
| <b><i>Rhoicosphenia</i> Grunow 1860</b>                                   |                                                                                                                                                                                           |   |   |   |   |   |
| <i>Rhoicosphenia abbreviata</i> (C. Agardh) Lange-Bert. 1980              | Bas.: <i>Gomphonema abbreviatum</i> C. Agardh 1831; Syn.: <i>Rhoicosphenia curvata</i> (Kütz.) Grunow 1860, <i>Rhoicosphenia marina</i> (W. Sm.) M. Schmidt ex A.W.F. Schmidt et al. 1899 | + | + | + | + | + |
| <b><i>Gomphonemopsis</i> Medlin ex Medlin et Round 1986</b>               |                                                                                                                                                                                           |   |   |   |   |   |
| <i>Gomphonemopsis domniciae</i> (Gusl.) Gusl. 1992                        | Bas.: <i>Gomphonema domniciae</i> Gusl. 1981                                                                                                                                              | - | - | + | + | - |
| <b>Anomoeoneidaceae Mann 1990</b>                                         |                                                                                                                                                                                           |   |   |   |   |   |
| <b><i>Anomoeoneis</i> Pfitzer 1871</b>                                    |                                                                                                                                                                                           |   |   |   |   |   |
| <i>Anomoeoneis sphaerophora</i> (Ehrenb.) Pfitzer 1871                    | Syn.: <i>Navicula sphaerophora</i> Kütz. 1844; <i>Navicula amphisbaena</i> var. <i>sphaerophora</i> (Kütz.) Rabenh. 1847                                                                  | - | - | + | + | - |
| <b><i>Staurophora</i> Mereschk. 1903</b>                                  |                                                                                                                                                                                           |   |   |   |   |   |
| <i>Staurophora salina</i> (W. Sm.) Mereschk. 1903                         | Bas.: <i>Stauroneis salina</i> W. Sm. 1853; Syn.: <i>Navicula salina</i> (W. Sm.) Schütt 1896; <i>Schizonema salinum</i> (W. Sm.) Kuntze 1898                                             | + | - | + | + | + |

| 1                                                                                            | 2                                                                                                                                                                                                                                                                                                                            | 3 | 4 | 5 | 6 | 7 |
|----------------------------------------------------------------------------------------------|------------------------------------------------------------------------------------------------------------------------------------------------------------------------------------------------------------------------------------------------------------------------------------------------------------------------------|---|---|---|---|---|
| <i>Staurophora wislouchii</i> (V.S. Poretzky et Anisimova)<br>D.G. Mann et Round et al. 1990 | Bas.: <i>Stauroneis wislouchii</i><br>V.S. Poretzky et Anisimova<br>1933                                                                                                                                                                                                                                                     | - | - | + | - | - |
| <b>Cymbellaceae Grev. 1833</b><br><b><i>Placoneis</i> Mereschk. 1903</b>                     |                                                                                                                                                                                                                                                                                                                              |   |   |   |   |   |
| <i>Placoneis dicephala</i> (Ehrenb.) Mereschk. 1903                                          |                                                                                                                                                                                                                                                                                                                              | - | + | - | - | - |
| <i>Placoneis elginensis</i> (W. Greg.) E.J. Cox 1987                                         | Bas.: <i>Pinnularia elginensis</i> W.<br>Greg. 1856; Syn.: <i>Navicula elginensis</i> (W. Greg.) Ralfs ex<br>A. Pritch. 1861; <i>Placoneis dicephala</i> var. <i>elginensis</i> (W.<br>Greg.) Mereschk. 1903                                                                                                                 | - | + | + | - | - |
| <i>Placoneis elginensis</i> f. <i>exigua</i> (W. Greg.) Bukht. 1995                          | Bas.: <i>Pinnularia exigua</i> W.<br>Greg. 1854, Syn.: <i>Navicula exigua</i> (W. Greg.) Grunow ex<br>Van Heurck 1880; <i>Placoneis exigua</i> (W. Greg.) Mereschk.<br>1903, <i>Placoneis gastrum</i> var. <i>exigua</i> (W. Greg.) Mereschk.<br>1903; <i>Navicula gastrum</i> var. <i>exigua</i> (W. Greg.) Grunow<br>1880; | - | + | + | - | - |
| <i>Placoneis placentula</i> (Ehrenb.) Mereschk. 1903                                         | Bas.: <i>Pinnularia placentula</i><br>Ehrenb. 1843, Syn.: <i>Navicula placentula</i> (Ehrenb.) Kütz.<br>1844; <i>Navicula gastrum</i> var. <i>placentula</i> (Ehrenb.) Van<br>Heurck 1885; <i>Navicula gastrum</i> var. <i>placentula</i><br>(Ehrenb.) A. Mann 1893                                                          | - | + | + | - | - |
| <i>Placoneis placentula</i> f. <i>rostrata</i> (Maier) Bukht. 1995                           | Bas.: <i>Navicula placentula</i> var. <i>rostrata</i> Mayer 1918; Syn.:<br><i>Navicula placentula</i> f. <i>rostrata</i><br>(Mayer) Hust. 1930                                                                                                                                                                               | + | + | - | - | - |
| <i>Placoneis</i> sp.1                                                                        |                                                                                                                                                                                                                                                                                                                              | - | - | - | + | - |
| <b><i>Cymbella</i> C. Agardh 1830</b>                                                        |                                                                                                                                                                                                                                                                                                                              |   |   |   |   |   |
| <i>Cymbella affinis</i> Kütz. 1844                                                           |                                                                                                                                                                                                                                                                                                                              | + | + | + | + | - |
| <i>Cymbella angusta</i> (W. Greg.) Gusl. 1992                                                | Bas.: <i>Amphora angusta</i> W.<br>Greg. 1857                                                                                                                                                                                                                                                                                | + | + | + | + | + |
| <i>Cymbella angusta</i> var. <i>kujalnitzkensis</i> Gusl. et<br>Gerasimiuk 1992              |                                                                                                                                                                                                                                                                                                                              | - | - | + | - | - |
| <i>Cymbella</i> cf. <i>angusta</i> (W. Greg.) Gusl. 1992                                     |                                                                                                                                                                                                                                                                                                                              | - | - | - | + | - |
| <i>Cymbella angustata</i> (W. Sm.) Cleve 1894                                                | Bas.: <i>Navicula angustata</i> W.<br>Sm. 1853                                                                                                                                                                                                                                                                               | - | - | - | + | - |
| <i>Cymbella aspera</i> (Ehrenb.) Cleve 1894                                                  | Bas.: <i>Cocconema asperum</i><br>Ehrenb. 1840; Syn.: <i>Cymbella lanceolatum</i> var. <i>aspera</i><br>(Ehrenb.) Brun 1880                                                                                                                                                                                                  | - | + | - | - | - |
| <i>Cymbella cistula</i> (Hemprich ex Hemprich et Ehrenb.)<br>Kirchner 1878                   | Bas.: <i>Bacillaria cistula</i> Ehrenb.<br>ex Hemprich et Ehrenb. 1828                                                                                                                                                                                                                                                       | + | + | + | + | - |
| <i>Cymbella cymbiformis</i> C. Agardh 1830                                                   |                                                                                                                                                                                                                                                                                                                              | - | - | + | + | - |

| 1                                                       | 2                                                                                                                                                                                                                                                                                              | 3 | 4 | 5 | 6 | 7 |
|---------------------------------------------------------|------------------------------------------------------------------------------------------------------------------------------------------------------------------------------------------------------------------------------------------------------------------------------------------------|---|---|---|---|---|
| <i>Cymbella excisa</i> Kütz. 1844                       | Syn.: <i>Cymbella affinis</i> Cleve 1894 non <i>Cymbella affinis</i> Hust. 1930; <i>Cymbella affinis</i> f. <i>excisa</i> (Kütz.) Grunow sensu Mills 1934; <i>Cymbella affinis</i> var. <i>excisa</i> (Kütz.) Grunow 1882; <i>Encyonema ventricosum</i> var. <i>excisum</i> (Kütz.) Mayer 1947 | - | - | - | + | - |
| <i>Cymbella helvetica</i> Kütz. 1844                    | Syn.: <i>Cymbella gastroides</i> var. <i>helvetica</i> (Kütz.) Rabenh. 1864; <i>Cocconema helveticum</i> (Kütz.) Cleve et Grunow 1880; <i>Cocconema helvetica</i> (Kütz.) A.W.F. Schmidt et al. 1881                                                                                           | - | - | + | + | + |
| <i>Cymbella lanceolata</i> (C. Agardh) Kirchner 1878    | Bas.: <i>Gomphonema lanceolatum</i> C. Agardh 1831; Syn.: <i>Cocconema lanceolatum</i> (C. Agardh) Ehrenb. 1838; <i>Cymbella lanceolata</i> (C. Agardh) Van Heurck 1881                                                                                                                        | + | + | + | - | - |
| <i>Cymbella odessana</i> Gusl. 1992                     |                                                                                                                                                                                                                                                                                                | - | - | + | + | - |
| <i>Cymbella parva</i> (W. Sm.) Kirchn. 1878             | Bas.: <i>Cocconema parvum</i> W. Sm. 1853; Syn.: <i>Cymbella cymbiformis</i> var. <i>parva</i> (W. Sm.) Van Heurck 1885                                                                                                                                                                        | + | - | - | - | - |
| <i>Cymbella prostrata</i> (Berk.) Cleve 1894            | Bas.: <i>Monema prostratum</i> Berk. 1833                                                                                                                                                                                                                                                      | + | - | + | + | - |
| <i>Cymbella tumida</i> (Bréb. ex Kütz.) Van Heurck 1880 | Bas.: <i>Cocconema tumidum</i> Bréb. ex Kütz. 1849                                                                                                                                                                                                                                             | - | + | + | + | - |
| <i>Cymbella</i> sp.1                                    |                                                                                                                                                                                                                                                                                                | - | - | - | + | + |
| <i>Cymbella</i> sp.4                                    |                                                                                                                                                                                                                                                                                                | - | - | - | + | - |
| <i>Cymbella</i> sp.5                                    |                                                                                                                                                                                                                                                                                                | - | - | - | + | - |
| <i>Cymbella</i> sp.D1                                   |                                                                                                                                                                                                                                                                                                | - | - | - | + | - |
| <i>Cymbella</i> sp.6K                                   |                                                                                                                                                                                                                                                                                                | - | - | - | + | - |
| <b>Brebissonia Grunow 1860</b>                          |                                                                                                                                                                                                                                                                                                |   |   |   |   |   |
| <i>Brebissonia boeckii</i> (Ehrenb.) O'Meara 1875       | Bas.: <i>Cocconema boeckii</i> Ehrenb. 1835; Syn.: <i>Navicula boeckii</i> (Ehrenb.) Heib. 1863; <i>Raphoneis boeckii</i> (Ehrenb.) L.W. Bailey 1910                                                                                                                                           | - | - | + | + | - |
| <b>Encyonema Kütz. 1833</b>                             |                                                                                                                                                                                                                                                                                                |   |   |   |   |   |
| <i>Encyonema caespitosum</i> Kütz. 1849                 | Syn.: <i>Cymbella caespitosa</i> (Kütz.) Brun 1880; <i>Cymbella caespitosa</i> (Kütz.) Schutt 1896; <i>Cymbella ventricosa</i> var. <i>caespitosa</i> (Kütz.) Dippel 1905; <i>Cymbella turgida</i> var. <i>caespitosa</i> Kütz. sensu Cleve-Euler 1932; <i>Cymbella</i>                        | - | - | + | + | - |

| 1                                                                              | 2                                                                                                                                                                                               | 3 | 4 | 5 | 6 | 7 |
|--------------------------------------------------------------------------------|-------------------------------------------------------------------------------------------------------------------------------------------------------------------------------------------------|---|---|---|---|---|
|                                                                                | <i>prostrata</i> var. <i>caespitosa</i><br>(Kütz.) Foged 1974                                                                                                                                   |   |   |   |   |   |
| <i>Encyonema elginense</i> (Krammer) D.G. Mann 1990                            | Bas.: <i>Cymbella elginensis</i><br>Krammer 1980 non <i>Cymbella turgida</i> W. Greg. 1856, non <i>Cymbella turgida</i> (Ehrenb.) Hassall 1854; <i>Encyonema turgidum</i> (W.Greg.) Grunow 1875 | + | + | + | - | - |
| <i>Encyonema minutum</i> (Hilse ex Rabenh.) D.G. Mann 1990                     | Bas.: <i>Cymbella minuta</i> W. Hilse ex Rabenh. 1862; Syn.: <i>Encyonema gracilis</i> var. <i>minuta</i> (Hilse) Rabenh. 1924                                                                  | + | + | + | - | - |
| <i>Encyonema</i> sp.K1                                                         |                                                                                                                                                                                                 | - | - | - | + | - |
| <b><i>Encyonopsis</i> Krammer 1997</b>                                         |                                                                                                                                                                                                 |   |   |   |   |   |
| <i>Encyonopsis microcephala</i> (Grunow) Krammer 1997*                         | Syn.: <i>Cymbella microcephala</i><br>Grunow ex Van Heurck 1880-1885                                                                                                                            | - | - | + | + | - |
| <b><i>Cymbopleura</i> (Krammer) Krammer 1997</b>                               |                                                                                                                                                                                                 |   |   |   |   |   |
| <i>Cymbopleura amphicephala</i> (Nägeli) Krammer 2003*                         | Bas.: <i>Cymbella amphicephala</i><br>Nägeli ex Kütz. 1849                                                                                                                                      | - | + | - | - | - |
| <i>Cymbopleura problematica</i> (Van Land.) Krammer 2003                       | Bas.: <i>Cymbella navicula</i><br>Skvortzow 1937; Syn.: <i>Cymbella problematica</i><br>VanLand. 1969                                                                                           | - | + | - | - | - |
| <b>Gomphonemataceae Kütz. 1844</b><br><b><i>Gomphonema</i> Ehrenb. 1832</b>    |                                                                                                                                                                                                 |   |   |   |   |   |
| <i>Gomphonema acuminatum</i> Ehrenb. 1832                                      |                                                                                                                                                                                                 | + | - | + | + | - |
| <i>Gomphonema angustatum</i> (Kütz.) Rabenh. 1864                              | Bas.: <i>Sphenella angustata</i><br>Kütz. 1844                                                                                                                                                  | - | + | + | + | + |
| <i>Gomphonema angustatum</i> var. <i>productum</i> Grunow 1880                 |                                                                                                                                                                                                 | - | - | - | + | - |
| <i>Gomphonema augur</i> Ehrenb. 1840                                           |                                                                                                                                                                                                 | - | + | + | - | - |
| <i>Gomphonema constrictum</i> Ehrenb. 1832                                     |                                                                                                                                                                                                 | - | - | - | + | - |
| <i>Gomphonema parvulum</i> (Kütz.) Kütz. 1849                                  | Bas.: <i>Sphenella parvula</i> Kütz. 1844; Syn.: <i>Sphenoneis parvula</i> (Kütz.) Trevisan 1848, <i>Gomphonella parvula</i> (Kütz.) Rabenh. 1853                                               | + | + | + | + | - |
| <i>Gomphonema parvulum</i> var. <i>subelliptica</i> Cleve 1894                 |                                                                                                                                                                                                 | - | + | + | - | - |
| <i>Gomphonema productum</i> (Grunow) Lange-Bert. et Reichardt 1991             | Bas.: <i>Gomphonema productum</i><br>Grunow 1880                                                                                                                                                | - | + | - | + | - |
| <i>Gomphonema salinarum</i> (Pant.) Cleve 1894                                 | Bas.: <i>Gomphonema olivaceum</i><br>var. <i>salinarum</i> Pant. 1889                                                                                                                           | + | - | - | - | - |
| <i>Gomphonema truncatum</i> Ehrenb. 1832                                       | Bas.: <i>Gomphonema constrictum</i> var. <i>truncatum</i><br>(Ehrenb.) Gutwinski 1887                                                                                                           | - | - | + | + | - |
| <i>Gomphonema</i> sp.1                                                         |                                                                                                                                                                                                 | - | - | - | + | - |
| <b><i>Gomphoneis</i> Cleve 1894</b>                                            |                                                                                                                                                                                                 |   |   |   |   |   |
| <i>Gomphoneis olivaceum</i> (Hornemann) P. Dawson ex R. Ross et P.A. Sims 1978 | Bas.: <i>Ulva olivacea</i> Hornem. 1806-1810; Syn.: <i>Gomphonema</i>                                                                                                                           | - | + | + | + | + |

| 1                                                                              | 2                                                                                                                                                                                                                                                            | 3 | 4 | 5 | 6 | 7 |
|--------------------------------------------------------------------------------|--------------------------------------------------------------------------------------------------------------------------------------------------------------------------------------------------------------------------------------------------------------|---|---|---|---|---|
|                                                                                | <i>olivaceum</i> (Hornem.) Ehrenb. 1838                                                                                                                                                                                                                      |   |   |   |   |   |
| <i>Gomphoneis olivaceum</i> var. <i>minutissimum</i> (Hust.) Bukht. 1995       | Bas.: <i>Gomphonema olivaceum</i> var. <i>minutissima</i> Hust. 1930                                                                                                                                                                                         | - | - | - | + | - |
| <b>Reimeria Kociolek et Stoermer 1987</b>                                      |                                                                                                                                                                                                                                                              |   |   |   |   |   |
| <i>Reimeria sinuata</i> (W. Greg.) Kociolek et Stoermer 1987                   | Bas.: <i>Cymbella sinuata</i> W. Greg. 1856                                                                                                                                                                                                                  | - | + | - | - | - |
| <i>Reimeria sinuata</i> f. <i>ovata</i> (Hust.) Bukht. 1999                    | Bas.: <i>Cymbella sinuata</i> var. <i>ovata</i> Hust. 1922, Syn.: <i>Cymbella sinuata</i> var. <i>ovata</i> (Hust.) Cleve-Euler 1955; <i>Reimeria sinuata</i> f. <i>ovata</i> (Hust.) Hartley 1996; <i>Reimeria ovata</i> (Hust.) Levkov et Ector 2010       | - | + | - | - | - |
| <b>ACHNANTHALES P.C. Silva 1962</b>                                            |                                                                                                                                                                                                                                                              |   |   |   |   |   |
| <b>Achnanthaceae Kütz. 1844</b>                                                |                                                                                                                                                                                                                                                              |   |   |   |   |   |
| <b>Achnanthes Bory 1822</b>                                                    |                                                                                                                                                                                                                                                              |   |   |   |   |   |
| <i>Achnanthes angustata</i> (Grev.) Cleve 1895                                 | Bas.: <i>Achnanthes angustata</i> Grev. 1859                                                                                                                                                                                                                 | + | - | - | - | - |
| <i>Achnanthes bacescui</i> Bodeanu 1976                                        |                                                                                                                                                                                                                                                              | - | + | - | - | - |
| <i>Achnanthes brevipes</i> C. Agardh 1824                                      | Syn.: <i>Achnantella brevipes</i> (Agardh) Gaillon 1833; <i>Achnanthidium brevipes</i> (Agardh) Heib. 1863; <i>Achnanthes brevipes</i> (Agardh) Cleve 1895                                                                                                   | + | + | + | + | + |
| <i>Achnanthes brevipes</i> C. Agardh var. <i>intermedia</i> (Kütz.) Cleve 1895 | Bas.: <i>Achnanthes intermedia</i> Kütz. 1833; Syn.: <i>Achnanthidium brevipes</i> var. <i>intermedia</i> (Kütz.) Cleve VanLand. 1967                                                                                                                        | + | + | + | + | + |
| <i>Achnanthes brockmannii</i> Hust. 1959                                       | Syn.: <i>Achnanthes danica</i> sensu Schulz 1926; <i>A. schulzii</i> Brockmann 1954                                                                                                                                                                          | - | - | + | + | - |
| <i>Achnanthes curvirostrum</i> Brun 1895*                                      |                                                                                                                                                                                                                                                              | - | - | - | + | - |
| <i>Achnanthes danica</i> (Flogel) Grunow 1880                                  | Bas.: <i>Cocconeis danica</i> Flögel 1873; Syn.: <i>Actinoneis danica</i> (Flogel) Cleve 1895                                                                                                                                                                | + | - | - | - | - |
| <i>Achnanthes fimbriata</i> (Grunow) R. Ross 1963                              | Bas.: <i>Schizostauron fimbriatum</i> Grunow 1867; Syn.: <i>Achnanthes manifera</i> Brun 1895; <i>A. stroemii</i> Hust. 1933; <i>Achnanthes heteropsis</i> Grunow ex Cleve et J.D. Möller 1878; <i>Navicula fimbriata</i> (Grunow) Cleve et J.D. Möller 1878 | + | + | + | + | - |
| <i>Achnanthes groenlandica</i> (Cleve) Grunow 1880                             | Bas.: <i>Achnanthidium groenlandicum</i> Cleve 1873                                                                                                                                                                                                          | - | - | + | - | - |
| <i>Achnanthes hungarica</i> (Grunow) Grunow 1880                               | Bas.: <i>Achnanthidium</i>                                                                                                                                                                                                                                   | - | - | + | - | - |

| 1                                                                                                | 2                                                                                                                                                                                                                                                                                                                                                                            | 3 | 4 | 5 | 6 | 7 |
|--------------------------------------------------------------------------------------------------|------------------------------------------------------------------------------------------------------------------------------------------------------------------------------------------------------------------------------------------------------------------------------------------------------------------------------------------------------------------------------|---|---|---|---|---|
|                                                                                                  | <i>hungaricum</i> Grunow 1863,<br>Syn.: <i>Microneis hungarica</i><br>(Grunow) Cleve 1895;<br><i>Cocconeis hungarica</i><br>(Grunow) Schönfeldt 1907;<br><i>Microneis hungarica</i><br>(Grunow) Meister 1912;<br><i>Lemnicola hungarica</i><br>(Grunow) Round et Basson<br>1997                                                                                              |   |   |   |   |   |
| <i>Achnanthes islandica</i> Østrup 1918*                                                         | Syn.: <i>Achnanthes brevipes</i> var.<br><i>islandica</i> (Østrup) Lange-<br>Bert. 1991                                                                                                                                                                                                                                                                                      | - | - | - | + | - |
| <i>Achnanthes longipes</i> C. Agardh 1824                                                        |                                                                                                                                                                                                                                                                                                                                                                              | + | + | + | + | + |
| <i>Achnanthes lorenziana</i> (Grunow) Cleve 1895                                                 | Bas.: <i>Rhaphoneis lorenziana</i><br>Grunow 1862; Syn.:<br><i>Achnanthes baldjickii</i> var.<br><i>lorenziana</i> (Grunow) Ross<br>1963; <i>Achnanthidium</i><br><i>lorenziana</i> (Grunow)<br>Grunow ex A.W.F. Schmidt<br>et al. 1895; <i>Actinoneis</i><br><i>lorenziana</i> (Grunow)<br>Mereschk. 1902; <i>Cocconeis</i><br><i>lorenziana</i> (Grunow) H.<br>Perag. 1888 | + | - | - | + | - |
| <i>Achnanthes lyrata</i> Proschk.-Lavr. 1961                                                     |                                                                                                                                                                                                                                                                                                                                                                              | - | + | + | + | + |
| <i>Achnanthes mercurii</i> Witkowski, Metzeltin et Lange-<br>Bert. 1996*                         |                                                                                                                                                                                                                                                                                                                                                                              | - | - | - | + | - |
| <i>Achnanthes mirabilis</i> Proschk.-Lavr. 1955                                                  |                                                                                                                                                                                                                                                                                                                                                                              | - | - | + | + | - |
| <i>Achnanthes parvula</i> Kütz. 1844                                                             | Syn.: <i>Achnanthes brevipes</i> var.<br><i>parvula</i> (Kütz.) Cleve 1895                                                                                                                                                                                                                                                                                                   | + | - | + | + | - |
| <i>Achnanthes pinnata</i> Hust. 1922                                                             |                                                                                                                                                                                                                                                                                                                                                                              | - | - | + | + | - |
| <i>Achnanthes placentuloides</i> (Gusl.) Witkowski, Lange-<br>Bert. et Metzeltin 2000            | Bas.: <i>Cocconeis placentuloides</i><br>Gusl. 1992                                                                                                                                                                                                                                                                                                                          | - | - | + | + | - |
| <i>Achnanthes</i> cf. <i>placentuloides</i> (Gusl.) Witkowski, Lange-<br>Bert. et Metzeltin 2000 |                                                                                                                                                                                                                                                                                                                                                                              |   |   |   | + |   |
| <i>Achnanthes pseudogroenlandica</i> Hendey 1964                                                 |                                                                                                                                                                                                                                                                                                                                                                              | - | - | + | + | + |
| <i>Achnanthes vistulana</i> Witkowski 1994*                                                      |                                                                                                                                                                                                                                                                                                                                                                              | - | - | - | + | - |
| <i>Achnanthes</i> sp.B06                                                                         |                                                                                                                                                                                                                                                                                                                                                                              | - | - | - | + | - |
| <i>Achnanthes</i> sp.O1                                                                          |                                                                                                                                                                                                                                                                                                                                                                              | - | - | - | + | - |
| <i>Achnanthes</i> sp.PHYL1                                                                       |                                                                                                                                                                                                                                                                                                                                                                              | - | - | + | - | - |
| <i>Achnanthes</i> sp.PHYL2                                                                       |                                                                                                                                                                                                                                                                                                                                                                              | - | - | + | - | - |
| <i>Achnanthes</i> sp.PHYL3                                                                       |                                                                                                                                                                                                                                                                                                                                                                              | - | - | + | - | - |
| <b>Karayevia Round et Bukht. ex Round 1998</b>                                                   |                                                                                                                                                                                                                                                                                                                                                                              |   |   |   |   |   |
| <i>Karayevia amoena</i> (Hust.) Bukht. 2006                                                      | Bas.: <i>Achnanthes amoena</i><br>Hust. 1952; Syn.: <i>Achnanthes</i><br><i>orientalis</i> Hust. 1933 non<br>Petit 1904, <i>Achnanthes</i><br><i>triconfusa</i> VanLand. 1967;                                                                                                                                                                                               | - | - | + | + | - |

| 1                                                                                            | 2                                                                                                                                                                                                                                      | 3 | 4 | 5 | 6 | 7 |
|----------------------------------------------------------------------------------------------|----------------------------------------------------------------------------------------------------------------------------------------------------------------------------------------------------------------------------------------|---|---|---|---|---|
|                                                                                              | <i>Kolbesia amoena</i> (Hust.) J.C. Kingston 2000                                                                                                                                                                                      |   |   |   |   |   |
| <b><i>Astartiella</i> Witkowski, Lange-Bert. et Metzeltin 1998 #</b>                         |                                                                                                                                                                                                                                        |   |   |   |   |   |
| <i>Astartiella bahusiensis</i> (Grunow) Witkowski, Lange-Bert. et Metzeltin 1998*            | Bas.: <i>Navicula minuscula</i> var. <i>bahusiensis</i> Grunow 1880; Syn.: <i>Achnanthes bahusiensis</i> (Grunow) Lange-Bert. 1989; <i>Navicula bahusiensis</i> (Grunow) Cleve 1895; <i>Schizonema bahusiense</i> (Grunow) Kuntze 1898 | - | - | + | + | - |
| <i>Astartiella producta</i> Witkowski, Lange-Bert. et Metzeltin 2000*                        |                                                                                                                                                                                                                                        | - | - | - | + | - |
| <i>Astartiella</i> sp. AW B362 1015*                                                         |                                                                                                                                                                                                                                        | - | - | - | + | - |
| <i>Astartiella</i> sp.O1                                                                     |                                                                                                                                                                                                                                        | - | - | - | + | - |
| <i>Astartiella</i> sp.2K                                                                     |                                                                                                                                                                                                                                        | - | - | - | + | - |
| <b><i>Pauliella</i> Round et P.W. Basson 1997</b>                                            |                                                                                                                                                                                                                                        |   |   |   |   |   |
| <i>Pauliella taeniata</i> (Grunow) Round et Basson 1997                                      | Bas.: <i>Achnanthes taeniata</i> Grunow 1880                                                                                                                                                                                           | - | - | - | + | - |
| <b><i>Planothidium</i> Round et Bukht. 1996</b>                                              |                                                                                                                                                                                                                                        |   |   |   |   |   |
| <i>Planothidium campechianum</i> (Hust.) Witkowski, Metzeltin et Lange-Bert. 2000*           | Bas.: <i>Achnanthes campechianum</i> Hust. 1952                                                                                                                                                                                        | - | - | - | + | - |
| <i>Planothidium delicatulum</i> (Kütz.) Round et Bukht. 1996                                 | Bas.: <i>Achnanthidium delicatulum</i> Kütz. 1844; Syn.: <i>Achnanthes delicatula</i> (Kütz.) Brun 1880; <i>Achnanthes delicatula</i> (Kütz.) Grunow 1880, <i>Achnantheiopsis delicatula</i> (Kütz.) Lange-Bert. 1997                  | - | - | + | + | - |
| <i>Planothidium</i> cf. <i>delicatulum</i> (Kütz.) Round et Bukht. 1996                      |                                                                                                                                                                                                                                        | - | - | + | + | - |
| <i>Planothidium</i> cf. <i>delicatulum</i> spp.1 (Kütz.) Round et Bukht. 1996                |                                                                                                                                                                                                                                        | - | - | - | + | - |
| <i>Planothidium deperditum</i> (Giffen) Witkowski, Lange-Bert. et Metzeltin 2000*            | Bas.: <i>Cocconeis deperdita</i> Giffen 1975                                                                                                                                                                                           | - | - | + | + | - |
| <i>Planothidium</i> cf. <i>deperditum</i> (Giffen) Witkowski, Lange-Bert. et Metzeltin 2000* |                                                                                                                                                                                                                                        | - | - | - | + | - |
| <i>Planothidium diplopunctatum</i> (Simonsen) Witkowski, Lange-Bert. et Metzeltin 2000*      | Bas.: <i>Achnanthes diplopunctatum</i> Simonsen 1959                                                                                                                                                                                   | - | - | - | + | - |
| <i>Planothidium dispar</i> (Cleve) Witkowski, Metzeltin et Lange-Bert. 2000                  | Bas.: <i>Achnanthes dispar</i> Cleve 1891; Syn.: <i>Actinoneis dispar</i> (Cleve) Cleve 1895                                                                                                                                           | - | - | + | + | - |
| <i>Planothidium engelbrechtii</i> (Cholnoky) Round et Bukht. 1996                            | Bas.: <i>Achnanthes engelbrechtii</i> Cholnoky 1955                                                                                                                                                                                    | - | - | - | + | - |
| <i>Planothidium hauckianum</i> (Grunow) Round et Bukht. 2008                                 | Bas.: <i>Achnanthes hauckiana</i> Grunow ex Cleve et Grunow 1880; Syn.: <i>Microneis hauckiana</i> (Grunow) Cleve                                                                                                                      | + | + | - | + | - |



| 1                                                                                                                 | 2                                                                                                                                                                                                                                                                                                                                                                                                                                                                                           | 3 | 4 | 5 | 6 | 7 |
|-------------------------------------------------------------------------------------------------------------------|---------------------------------------------------------------------------------------------------------------------------------------------------------------------------------------------------------------------------------------------------------------------------------------------------------------------------------------------------------------------------------------------------------------------------------------------------------------------------------------------|---|---|---|---|---|
|                                                                                                                   | 1895; <i>Achnantheiopsis hauckiana</i> (Grunow) Lange-Bert. 1997; <i>Achnanthes delicatula</i> ssp. <i>hauckiana</i> (Grunow) Lange-Bert. et Ruppel 1980; <i>Achnanthidium hauckianum</i> (Grunow) Czarn. 1994                                                                                                                                                                                                                                                                              |   |   |   |   |   |
| <i>Planothidium hauckianum</i> var. <i>rostratum</i> (Schulz ex Hust.) N.A. Andresen, Stoermer et R.G. Kreis 2000 | Bas.: <i>Achnanthes hauckiana</i> var. <i>rostrata</i> Schulz ex Hust. 1930                                                                                                                                                                                                                                                                                                                                                                                                                 | - | + | - | - | - |
| <i>Planothidium lanceolatum</i> (Bréb. ex Kütz.) Lange-Bert. 1999                                                 | Bas.: <i>Achnanthidium lanceolatum</i> Bréb. ex Kütz. 1846; Syn.: <i>Achnanthes lanceolata</i> (Bréb. ex Kütz.) Grunow ex Cleve et Grunow 1880; <i>Microneis lanceolata</i> (Bréb. ex Kütz.) Freng. 1923; <i>Achnantheiopsis lanceolata</i> (Bréb. ex Kütz.) Lange-Bert. 1997; <i>Planothidium lanceolatum</i> (Bréb. ex Kütz.) Round et Bukht. 1996; <i>Achnanthes lanceolata</i> (Bréb. ex Kütz.) Grunow ex Van Heurck 1880; <i>Planothidium lanceolatum</i> (Bréb. ex Kütz.) Bukht. 1999 | + | + | + | + | - |
| <i>Planothidium lanceolatum</i> f. <i>ventricosa</i> (Hust.) Bukht. 1999                                          | Bas.: <i>Achnanthes lanceolata</i> var. <i>ventricosa</i> Hust. 1914; Syn.: <i>Achnanthes lanceolata</i> f. <i>ventricosa</i> (Hust.) VanLand. 1967; <i>Microneis lanceolata</i> f. <i>ventricosa</i> (Hust.) Schulz 1928; <i>Achnanthidium lanceolatum</i> var. <i>ventricosum</i> (Hust.) V.S. Poretzky 1924                                                                                                                                                                              | + | - | - | - | - |
| <i>Planothidium quarnerensis</i> (Grunow) Witkowski, Lange-Bert. et Metzeltin 2000                                | Bas: <i>Rhaphoneis quarnerensis</i> Grunow 1862; Syn: <i>Cocconeis quarnerensis</i> (Grunow) A.W.F. Schmidt 1874; <i>Nematoplata quarnerensis</i> (Grunow) Kuntze 1898                                                                                                                                                                                                                                                                                                                      | + | - | + | + | + |
| <i>Planothidium rostratum</i> (Østrup) Lange-Bert. 1999                                                           | Bas.: <i>Achnanthes rostrata</i> Østrup 1902; Syn.: <i>Achnanthes lanceolata</i> var. <i>rostrata</i> Schulz 1926; <i>Achnanthes haynaldii</i> var. <i>borussica</i> Cleve-Euler 1953; <i>Achnanthes lanceolata</i> f. <i>rostrata</i> (Østrup) Hust. 1957;                                                                                                                                                                                                                                 | - | + | - | - | - |

| 1                                                                                               | 2                                                                                                                                                                                                                                                                                                                     | 3 | 4 | 5 | 6 | 7 |
|-------------------------------------------------------------------------------------------------|-----------------------------------------------------------------------------------------------------------------------------------------------------------------------------------------------------------------------------------------------------------------------------------------------------------------------|---|---|---|---|---|
|                                                                                                 | <i>Achnantheiopsis rostrata</i><br>(Østrup) Lange-Bert. 1997;<br><i>Planothidium rostratum</i><br>(Østrup) Round et Bukht.<br>1996                                                                                                                                                                                    |   |   |   |   |   |
| <i>Planothidium</i> sp.1                                                                        |                                                                                                                                                                                                                                                                                                                       | - | - | - | + | - |
| <i>Planothidium</i> sp.1F                                                                       |                                                                                                                                                                                                                                                                                                                       | - | - | - | + | - |
| <i>Planothidium</i> sp.2                                                                        |                                                                                                                                                                                                                                                                                                                       | - | - | - | + | - |
| <i>Planothidium</i> sp.2F                                                                       |                                                                                                                                                                                                                                                                                                                       | - | - | - | + | - |
| <i>Planothidium</i> sp.3F                                                                       |                                                                                                                                                                                                                                                                                                                       | - | - | - | + | - |
| <i>Planothidium</i> sp.4F                                                                       |                                                                                                                                                                                                                                                                                                                       | - | - | - | + | - |
| <i>Planothidium</i> sp.5F                                                                       |                                                                                                                                                                                                                                                                                                                       | - | - | - | + | - |
| <i>Planothidium</i> sp.4PHYL                                                                    |                                                                                                                                                                                                                                                                                                                       | - | - | + | - | - |
| <i>Planothidium</i> sp.5PHYL                                                                    |                                                                                                                                                                                                                                                                                                                       | - | - | + | - | - |
| <b>Cocconeidaceae Kütz. 1844</b><br><b>Cocconeis Ehrenb. 1837</b>                               |                                                                                                                                                                                                                                                                                                                       |   |   |   |   |   |
| <i>Cocconeis britannica</i> Nägeli ex Kütz. 1849*                                               | Syn.: <i>Pleuroneis britannica</i><br>(Nägeli ex Kütz.) Cleve<br>1895                                                                                                                                                                                                                                                 | - | - | + | + | - |
| <i>Cocconeis californica</i> Grunow ex Van Heurck 1880*                                         | Syn.: <i>Cocconeis ambigua</i> var.<br><i>californica</i> Grunow ex<br>Cleve et J.D. Möller 1878;<br><i>Cocconeis californica</i><br>(Grunow ex Cleve et J.D.<br>Möller) Grunow ex Van<br>Heurck 1880; <i>Cocconeis</i><br><i>scutellum</i> var. <i>californica</i><br>(Grunow ex Cleve et J.D.<br>Möller) Cleve 1895 | - | - | - | + | - |
| <i>Cocconeis crispa</i> Edsbackge 1968*                                                         |                                                                                                                                                                                                                                                                                                                       | - | - | - | + | - |
| <i>Cocconeis clandestina</i> A.W.F. Schmidt 1894*                                               |                                                                                                                                                                                                                                                                                                                       | - | - | - | + | - |
| <i>Cocconeis convexa</i> Giffen 1967*                                                           |                                                                                                                                                                                                                                                                                                                       | - | - | - | + | - |
| <i>Cocconeis costata</i> W. Greg. 1855                                                          | Syn.: <i>Campyloneis costata</i><br>(W. Greg.) Lagerstedt 1876;<br><i>Pleuroneis costata</i> (W.<br>Greg.) Cleve 1895                                                                                                                                                                                                 | + | - | + | + | - |
| <i>Cocconeis diminuta</i> Pant. 1902*                                                           |                                                                                                                                                                                                                                                                                                                       | - | - | - | + | - |
| <i>Cocconeis dirupta</i> var. <i>flexella</i> (Janisch et Rabenh.)<br>Grunow ex Van Heurck 1880 | Bas.: <i>Cocconeis flexella</i><br>Janisch et Rabenh. 1863                                                                                                                                                                                                                                                            | - | - | + | + | + |
| <i>Cocconeis dirupta</i> var. <i>sigma</i> (Pant.) Cleve 1895                                   | Bas.: <i>Cocconeis sigma</i> Pant.<br>1886                                                                                                                                                                                                                                                                            | - | - | - | + | - |
| <i>Cocconeis discrepans</i> A.W.F. Schmidt 1894*                                                | Syn.: <i>Rhaphoneis tenuis</i><br>Hust. 1952                                                                                                                                                                                                                                                                          | - | - | - | + | - |
| <i>Cocconeis disculus</i> (Schum.) Cleve ex Cleve et Jentzsch<br>1882                           | Bas.: <i>Navicula disculus</i><br>Schum. 1862                                                                                                                                                                                                                                                                         | - | - | + | + | - |
| <i>Cocconeis distans</i> W. Greg. 1857                                                          |                                                                                                                                                                                                                                                                                                                       | + | + | + | + | + |
| <i>Cocconeis engelbrechtii</i> Cholnoky 1955                                                    |                                                                                                                                                                                                                                                                                                                       | - | - | + | + | - |
| <i>Cocconeis euglypta</i> Ehrenb. 1854                                                          | Syn.: <i>Cocconeis placentula</i><br>var. <i>euglypta</i> (Ehrenb.)<br>Grunow 1884; <i>Cocconeis</i>                                                                                                                                                                                                                  | + | + | + | + | + |

| 1                                                                                 | 2                                                                                                                                                                                                                   | 3 | 4 | 5 | 6 | 7 |
|-----------------------------------------------------------------------------------|---------------------------------------------------------------------------------------------------------------------------------------------------------------------------------------------------------------------|---|---|---|---|---|
|                                                                                   | <i>lineata</i> var. <i>euglypta</i> (Ehrenb.) Grunow ex Van Heurck 1880; <i>Cocconeis placentula</i> var. <i>euglypta</i> (Ehrenb.) Cleve 1895; <i>Cocconeis placentula</i> f. <i>euglypta</i> (Ehrenb.) Hust. 1957 |   |   |   |   |   |
| <i>Cocconeis guttata</i> Hust. et Aleem 1951*                                     |                                                                                                                                                                                                                     | - | - | + | + | - |
| <i>Cocconeis hauniensis</i> Witkowski emend. Witkowski 1993*                      |                                                                                                                                                                                                                     | - | - | - | + | - |
| <i>Cocconeis latecostata</i> Hust. 1955                                           |                                                                                                                                                                                                                     | - | - | - | + | - |
| <i>Cocconeis maxima</i> (Grunow) H. Perag. et Perag. 1897                         | Bas.: <i>Mastogloia maxima</i> Grunow 1863; Syn.: <i>Cocconeis scutellum</i> var. <i>maxima</i> (Grunow) Cleve 1895                                                                                                 | - | + | + | + | + |
| <i>Cocconeis molesta</i> Kütz. 1844                                               | Syn.: <i>Eucocconeis molesta</i> (Kütz.) Cleve 1895                                                                                                                                                                 | - | - | + | + | + |
| <i>Cocconeis molesta</i> var. <i>crucifera</i> Grunow ex Van Heurck 1880          | Syn.: <i>Eucocconeis molesta</i> var. <i>crucifera</i> (Grunow ex Van Heurck) Cleve 1895                                                                                                                            | - | - | + | + | + |
| <i>Cocconeis notata</i> P. Petit 1877                                             | Syn.: <i>Eucocconeis notata</i> (Petit) Cleve 1895                                                                                                                                                                  | - | + | + | + | + |
| <i>Cocconeis pediculus</i> Ehrenb. 1838                                           |                                                                                                                                                                                                                     | + | + | + | + | + |
| <i>Cocconeis pellucida</i> Grunow 1863                                            |                                                                                                                                                                                                                     | - | - | + | + | - |
| <i>Cocconeis pelta</i> A.W.F. Schmidt 1874*                                       |                                                                                                                                                                                                                     | - | - | - | + | - |
| <i>Cocconeis peltoides</i> Hust. 1931*                                            |                                                                                                                                                                                                                     | - | - | + | + | - |
| <i>Cocconeis placentula</i> Ehrenb. 1838                                          | Syn.: <i>Cocconeis pediculus</i> var. <i>placentula</i> (Ehrenb.) Grunow 1867                                                                                                                                       | + | + | + | + | + |
| <i>Cocconeis placentula</i> var. <i>intermedia</i> (Hérrib. et Perag.) Cleve 1895 | Syn.: <i>Cocconeis intermedia</i> Hérrib. et Perag. 1893; <i>Cocconeis rouxii</i> var. <i>intermedia</i> (Perag. et Hérrib.) Freng. 1936                                                                            | - | - | + | + | + |
| <i>Cocconeis placentula</i> var. <i>lineata</i> (Ehrenb.) Cleve 1895              | Bas.: <i>Cocconeis lineata</i> Ehrenb. 1843; Syn.: <i>Cocconeis placentula</i> var. <i>lineata</i> (Ehrenb.) Van Heurck 1885; <i>Cocconeis placentula</i> f. <i>lineata</i> (Ehrenb.) Hust. 1957                    | - | + | + | - | - |
| <i>Cocconeis pseudocostata</i> O.E. Romero 1996*                                  |                                                                                                                                                                                                                     | - | - | + | + | - |
| <i>Cocconeis pseudobesii</i> Proschk.-Lavr. 1963                                  |                                                                                                                                                                                                                     | - | + | + | + | - |
| <i>Cocconeis pseudograta</i> Hust. 1939*                                          |                                                                                                                                                                                                                     | - | - | - | + | - |
| <i>Cocconeis pseudomarginata</i> W. Greg. 1857                                    | Syn.: <i>Cocconeis pseudomarginata</i> A.W.F. Schmidt 1894                                                                                                                                                          | - | - | + | + | + |
| <i>Cocconeis scutellum</i> Ehrenb. 1838                                           |                                                                                                                                                                                                                     | + | + | + | + | + |

| 1                                                                                         | 2                                                                                                                       | 3 | 4 | 5 | 6 | 7 |
|-------------------------------------------------------------------------------------------|-------------------------------------------------------------------------------------------------------------------------|---|---|---|---|---|
| <i>Cocconeis scutellum</i> var. <i>adjuncta</i> (A.W.F. Schmidt) H. Perag. et Perag. 1897 | Bas.: <i>Cocconeis adjuncta</i> A.W.F. Schmidt 1894                                                                     | + | - | + | + | + |
| <i>Cocconeis scutellum</i> var. <i>minutissima</i> Grunow 1880                            | Syn.: <i>Cocconeis scutellum</i> f. <i>minutissima</i> (Grunow) Cleve 1883                                              | - | + | + | + | - |
| <i>Cocconeis scutellum</i> var. <i>parva</i> (Grunow) Cleve 1895                          | Bas.: <i>Cocconeis scutellum</i> f. <i>parva</i> Grunow 1880                                                            | + | + | + | + | + |
| <i>Cocconeis speciosa</i> W. Greg. 1855                                                   | Syn.: <i>Cocconeis scutellum</i> var. <i>speciosa</i> (W. Greg.) Cleve-Euler 1953                                       | - | - | - | + | - |
| <i>Cocconeis stauroneiformis</i> (Rabenh.) Okuno 1957                                     | Bas.: <i>Cocconeis scutellum</i> var. <i>stauroneiformis</i> Rabenh. 1864                                               | - | - | + | + | - |
| <i>Cocconeis</i> cf. <i>stauroneiformis</i> (Rabenh.) Okuno 1957                          |                                                                                                                         | - | - | - | + | - |
| <i>Cocconeis</i> sp.1                                                                     |                                                                                                                         | - | - | - | + | + |
| <i>Cocconeis</i> sp.2                                                                     |                                                                                                                         | - | - | - | + | + |
| <i>Cocconeis</i> sp.4                                                                     |                                                                                                                         | - | - | - | + | - |
| <i>Cocconeis</i> sp.5                                                                     |                                                                                                                         | - | - | - | + | - |
| <i>Cocconeis</i> sp.5W                                                                    |                                                                                                                         | - | - | + | + | - |
| <i>Cocconeis</i> sp.6M                                                                    |                                                                                                                         | - | - | - | + | - |
| <i>Cocconeis</i> sp.7PH                                                                   |                                                                                                                         | - | - | + | - | - |
| <i>Cocconeis</i> sp.8B                                                                    |                                                                                                                         | - | - | - | + | - |
| <i>Cocconeis</i> sp.9V                                                                    |                                                                                                                         | - | - | - | + | - |
| <i>Cocconeis</i> sp.10PHYL                                                                |                                                                                                                         | - | - | + | - | - |
| <i>Cocconeis</i> sp.11PHYL                                                                |                                                                                                                         | - | - | + | - | - |
| <i>Cocconeis</i> sp.B1                                                                    |                                                                                                                         | - | - | - | + | - |
| <i>Cocconeis</i> sp.G1                                                                    |                                                                                                                         | - | - | - | + | - |
| <i>Cocconeis</i> sp.G2                                                                    |                                                                                                                         | - | - | - | + | - |
| <i>Cocconeis</i> sp.O1                                                                    |                                                                                                                         | - | - | - | + | - |
| <i>Cocconeis</i> sp.O2                                                                    |                                                                                                                         | - | - | - | + | - |
| <i>Cocconeis</i> sp.A1                                                                    |                                                                                                                         | - | - | - | + | - |
| <b><i>Anorthoneis</i> Grunow 1868</b>                                                     |                                                                                                                         |   |   |   |   |   |
| <i>Anorthoneis eurystoma</i> Cleve 1895                                                   |                                                                                                                         | - | - | - | + | - |
| <i>Anorthoneis excentrica</i> (Donkin) Grunow 1867                                        | Bas.: <i>Cocconeis excentrica</i> Donkin 1858; Syn.: <i>Orthoneis excentrica</i> (Donkin) H. Perag. et Perag. 1897-1908 | - | - | + | + | - |
| <i>Anorthoneis hummii</i> Hust. 1955                                                      |                                                                                                                         | - | - | + | + | - |
| <i>Anorthoneis</i> sp.B1                                                                  |                                                                                                                         | - | - | - | + | - |
| <b><i>Amphicocconeis</i> M. De Stefano et D. Marino 2003</b>                              |                                                                                                                         |   |   |   |   |   |
| <i>Amphicocconeis disculoides</i> (Hust.) M. De Stefano et D. Marino 2002*                | Bas.: <i>Cocconeis disculoides</i> Hust. 1955                                                                           | + | - | + | - | - |
| <i>Amphicocconeis</i> sp.1F                                                               |                                                                                                                         | - | - | - | + | - |
| <b><i>Achnanthidiaceae</i> D.G. Mann 1990</b>                                             |                                                                                                                         |   |   |   |   |   |
| <b><i>Achnanthidium</i> Kütz. 1844</b>                                                    |                                                                                                                         |   |   |   |   |   |
| <i>Achnanthidium flexuistriatum</i> Riaux-Gob., Compère et Witkowski 2010*                |                                                                                                                         | - | - | - | + | - |
| <i>Achnanthidium glyphos</i> Riaux-Gob., Compère et Witkowski 2010*                       |                                                                                                                         | - | - | - | + | - |

| 1                                                                                                                                 | 2                                                                                                                                                                                                            | 3 | 4 | 5 | 6 | 7 |
|-----------------------------------------------------------------------------------------------------------------------------------|--------------------------------------------------------------------------------------------------------------------------------------------------------------------------------------------------------------|---|---|---|---|---|
| <i>Achnanthidium minutissimum</i> (Kütz.) Czarn. 1994                                                                             | Bas.: <i>Achnanthes minutissima</i> Kütz. 1833; <i>Microneis minutissima</i> (Kütz.) Cleve 1895; <i>Cocconeis minutissima</i> (Kütz.) Schonfeldt 1907; <i>Microneis minutissima</i> (Kütz.) Meister 1912     | - | + | - | + | - |
| <i>Achnanthidium minutissimum</i> var. <i>affinis</i> (Grunow) Bukht. 1995                                                        | Bas.: <i>Achnanthes affinis</i> Grunow 1880; <i>Microneis affinis</i> (Grunow) Cleve 1895; <i>Actinoneis affinis</i> (Grunow) Hollerbakh et Krasavina 1971; <i>Achnanthidium affine</i> (Grunow) Czarn. 1994 | - | - | + | - | - |
| <i>Achnanthidium</i> sp.2F                                                                                                        |                                                                                                                                                                                                              | - | - | - | + | - |
| <i>Achnanthidium</i> sp.1K                                                                                                        |                                                                                                                                                                                                              | - | - | - | + | - |
| <b>NAVICULALES Bessey 1907 emend. D.G. Mann</b><br><b>Berkeleyaceae D.G. Mann 1990</b><br><b><i>Parlibellus</i> E.J. Cox 1988</b> |                                                                                                                                                                                                              |   |   |   |   |   |
| <i>Parlibellus delognei</i> (Van Heurck) E.J. Cox 1988                                                                            | Bas.: <i>Navicula delognei</i> Van Heurck 1880; Syn.: <i>Schizonema grevillei</i> C. Agardh 1830; <i>Navicula grevillei</i> (C. Agardh) Heiberg 1863, <i>Navicula grevilleana</i> Hendey 1964                | + | + | + | + | + |
| <i>Parlibellus delognei</i> var. <i>pararhombica</i> (Proschk.-Lavr.) Ryabushko 2006                                              | Bas.: <i>Navicula grevillei</i> var. <i>pararhombica</i> Proschk.-Lavr. 1963; Syn.: <i>Navicula grevilleana</i> Hendey var. <i>pararhombica</i> (Proschk.-Lavr.) Gusl. et Gerasimuk 1992                     | - | + | + | - | - |
| <i>Parlibellus delognei</i> var. <i>remotiva</i> (Proschk.-Lavr.) Ryabushko 2006                                                  | Bas.: <i>Navicula grevillei</i> var. <i>remotiva</i> Proschk.-Lavr. 1963; Syn.: <i>Navicula grevilleana</i> Hendey var. <i>remotiva</i> (Proschk.-Lavr.) Gusl. et Gerasimuk 1992                             | - | + | + | + | + |
| <i>Parlibellus hamulifer</i> (Grunow) E.J. Cox 1988                                                                               | Bas.: <i>Navicula hamulifera</i> Grunow 1880; Syn.: <i>Libellus hamuliferus</i> (Grunow) De Toni 1890                                                                                                        | + | + | - | + | + |
| <i>Parlibellus hendeyi</i> Witkowski, Lange-Bert. et Metzeltin 2000*                                                              |                                                                                                                                                                                                              | - | - | - | + | - |
| <i>Parlibellus plicatus</i> (Donkin) E.J. Cox 1988                                                                                | Bas.: <i>Navicula plicata</i> Donkin 1872, Syn.: <i>Navicula plicata</i> Bodeanu 1976; <i>Navicula hamulifera</i> var. <i>plicata</i> Proschk.-Lavr. 1963                                                    | + | + | + | + | + |
| <i>Parlibellus protracta</i> (Grunow) Witkowski, Lange-Bert.                                                                      | Bas.: <i>Navicula protracta</i>                                                                                                                                                                              | + | - | - | - | - |

| 1                                                                   | 2                                                                                                                                                                                                                                                                  | 3 | 4 | 5 | 6 | 7 |
|---------------------------------------------------------------------|--------------------------------------------------------------------------------------------------------------------------------------------------------------------------------------------------------------------------------------------------------------------|---|---|---|---|---|
| et Metzeltin 2000                                                   | Grunow 1880                                                                                                                                                                                                                                                        |   |   |   |   |   |
| <i>Parlibellus</i> sp.D4                                            |                                                                                                                                                                                                                                                                    | - | - | - | + | - |
| <i>Parlibellus</i> sp.B1                                            |                                                                                                                                                                                                                                                                    | - | - | - | + | - |
| <i>Parlibellus</i> sp.L3                                            |                                                                                                                                                                                                                                                                    | - | - | - | + | - |
| <i>Parlibellus</i> sp.O2                                            |                                                                                                                                                                                                                                                                    | - | - | - | + | - |
| <b><i>Berkeleya</i> Grev. 1827</b>                                  |                                                                                                                                                                                                                                                                    |   |   |   |   |   |
| <i>Berkeleya micans</i> (Lyngb.) Grunow 1868 emend E.J. Cox 1979    | Bas.: <i>Bangia micans</i> Lyngb. 1819; Syn.: <i>Amphipleura micans</i> (Lyngb.) Cleve 1894                                                                                                                                                                        | - | + | + | + | + |
| <i>Berkeleya rutilans</i> (Trentep. ex Roth) Grunow 1880            | Bas.: <i>Conferova rutilans</i> Trentep. 1806; Syn.: <i>Bangia rutilans</i> (Roth) Lyngb. 1819; <i>Amphipleura rutilans</i> (Trentep.) Cleve 1894                                                                                                                  | + | + | + | + | + |
| <i>Berkeleya scopulorum</i> (Bréb.) E.J. Cox 1979                   | Bas.: <i>Navicula scopulorum</i> Bréb. 1849; Syn.: <i>Okedenia scopulorum</i> (Bréb.) Mereschk. 1901                                                                                                                                                               | + | + | + | + | + |
| <i>Berkeleya</i> sp.                                                |                                                                                                                                                                                                                                                                    | - | - | - | + | - |
| <b><i>Climaconeis</i> Grunow 1862</b>                               |                                                                                                                                                                                                                                                                    |   |   |   |   |   |
| <i>Climaconeis inflexa</i> (Bréb. ex Kütz.) E.J. Cox 1982           | Bas.: <i>Amphipleura inflexa</i> Bréb. ex Kütz. 1849; Syn.: <i>Amphora inflexa</i> (Bréb. ex Kütz.) H.L. Smith 1873; <i>Okedenia inflexa</i> (Bréb. ex Kütz.) Eulenst. ex Mereschk. 1901; <i>Okedenia inflexa</i> (Bréb. ex Kütz.) Eulenst. ex Cleve et Müll. 1879 | - | + | + | + | + |
| <i>Climaconeis scopulorioides</i> (Hust.) E.J. Cox 1982             | Bas.: <i>Navicula scopulorioides</i> Hust. 1961                                                                                                                                                                                                                    | - | - | + | - | - |
| <b>Cavinulaceae Mann 1990</b>                                       |                                                                                                                                                                                                                                                                    |   |   |   |   |   |
| <b><i>Cavinula</i> D.G. Mann et A. Stickle 1990</b>                 |                                                                                                                                                                                                                                                                    |   |   |   |   |   |
| <i>Cavinula lacustris</i> (W. Greg.) D.G. Mann et A. Stickle 1990   | Bas.: <i>Navicula lacustris</i> W. Greg. 1856                                                                                                                                                                                                                      | - | + | - | - | - |
| <b>Cosmioneidaceae D.G. Mann 1990</b>                               |                                                                                                                                                                                                                                                                    |   |   |   |   |   |
| <b><i>Cosmioneis</i> D.G. Mann et A. Stickle 1990</b>               |                                                                                                                                                                                                                                                                    |   |   |   |   |   |
| <i>Cosmioneis pusilla</i> (W. Sm.) D.G. Mann et A. Stickle 1990     | Bas.: <i>Navicula pusilla</i> W. Sm. 1853                                                                                                                                                                                                                          | - | - | + | + | - |
| <b>Diadesmidaceae D.G. Mann 1990</b>                                |                                                                                                                                                                                                                                                                    |   |   |   |   |   |
| <b><i>Luticola</i> D.G. Mann ex Round et al. 1990</b>               |                                                                                                                                                                                                                                                                    |   |   |   |   |   |
| <i>Luticola goeppertiana</i> (Bleisch) D.G. Mann 1990               | Bas.: <i>Navicula mutica</i> var. <i>goeppertiana</i> Bleisch 1861                                                                                                                                                                                                 | - | - | - | + | - |
| <i>Luticola mutica</i> (Kütz.) D.G. Mann 1990                       | Bas.: <i>Navicula mutica</i> Kütz. 1844; Syn.: <i>Navicula mutica</i> (Kütz.) Freng. 1924; <i>Placoneis mutica</i> (Kütz.) Mereschk. 1903                                                                                                                          | - | + | + | + | - |
| <i>Luticola mutica</i> var. <i>ventricosa</i> (Kütz.) Hamilton 1994 | Bas.: <i>Stauroneis ventricosa</i> Kütz. 1844; Syn.: <i>Navicula</i>                                                                                                                                                                                               | - | - | - | + | - |

| 1                                                                                           | 2                                                                                                                                                                                                                                                                                                                                                                                                                | 3 | 4 | 5 | 6 | 7 |
|---------------------------------------------------------------------------------------------|------------------------------------------------------------------------------------------------------------------------------------------------------------------------------------------------------------------------------------------------------------------------------------------------------------------------------------------------------------------------------------------------------------------|---|---|---|---|---|
|                                                                                             | <i>mutica</i> f. <i>ventricosa</i> (Kütz.)<br>Cleve 1894; <i>Navicula mutica</i><br>var. <i>ventricosa</i> (Kütz.) Cleve<br>et Grunow 1880; <i>Navicula</i><br><i>ventricosa</i> (Kütz.) Mills 1934;<br><i>Placoneis mutica</i> var.<br><i>ventricosa</i> (Kütz.) Mereschk.<br>1903; <i>Luticola mutica</i> f.<br><i>ventricosa</i> (Kütz.) Bukht.<br>1995; <i>Luticola ventricosa</i><br>(Kütz.) D.G. Mann 1990 |   |   |   |   |   |
| <i>Luticola nivalis</i> (Ehrenb.) D.G. Mann 1990                                            | Bas.: <i>Navicula nivalis</i> Ehrenb.<br>1853; Syn.: <i>Navicula mesolepta</i><br>var. <i>nivalis</i> (Ehrenb.) De<br>Toni 1891; <i>Navicula mutica</i><br>var. <i>nivalis</i> (Ehrenb.) Hust.<br>1911; <i>Navicula mutica</i> f.<br><i>nivalis</i> (Ehrenb.) Van der<br>Werff et Huls 1960                                                                                                                      | - | + | - | - | - |
| <b>Brachysiraceae D.G. Mann 1990</b><br><b><i>Brachysira</i> Kütz. 1836</b>                 |                                                                                                                                                                                                                                                                                                                                                                                                                  |   |   |   |   |   |
| <i>Brachysira aponina</i> Kütz. 1836                                                        |                                                                                                                                                                                                                                                                                                                                                                                                                  | - | - | + | - | - |
| <b>Neidiaceae Mereschk. 1903</b><br><b><i>Neidium</i> Pfitzer 1871</b>                      |                                                                                                                                                                                                                                                                                                                                                                                                                  |   |   |   |   |   |
| <i>Neidium binodis</i> (Ehrenb.) Hust. 1945                                                 | Bas.: <i>Navicula binodis</i><br>Ehrenb. 1840                                                                                                                                                                                                                                                                                                                                                                    | - | - | - | + | - |
| <b>Scoliotropidaceae Mereschk. 1903</b><br><b><i>Biremis</i> D.G. Mann et E.J. Cox 1990</b> |                                                                                                                                                                                                                                                                                                                                                                                                                  |   |   |   |   |   |
| <i>Biremis ambigua</i> (Cleve) D.G. Mann 1990                                               | Bas.: <i>Pinnularia ambigua</i><br>Cleve 1895                                                                                                                                                                                                                                                                                                                                                                    | - | - | + | + | + |
| <i>Biremis lucens</i> (Hust.) Sabbe, Witkowski et Vyverman<br>1995*                         | Bas.: <i>Navicula lucens</i> Hust.<br>1942; Syn.: <i>Fallacia lucens</i><br>(Hust.) D.G. Mann 1990                                                                                                                                                                                                                                                                                                               | - | - | + | + | - |
| <i>Biremis ridicula</i> (Giffen) D.G. Mann 1990*                                            | Bas.: <i>Amphora ridicula</i> Giffen<br>1976                                                                                                                                                                                                                                                                                                                                                                     | - | - | - | + | - |
| <i>Biremis</i> sp.1B                                                                        |                                                                                                                                                                                                                                                                                                                                                                                                                  | - | - | - | + | - |
| <b>Scolioneis D.G. Mann ex Round et al. 1990</b>                                            |                                                                                                                                                                                                                                                                                                                                                                                                                  |   |   |   |   |   |
| <i>Scolioneis tumida</i> (Bréb. ex Kütz.) D.G. Mann 1990                                    | Bas.: <i>Navicula tumida</i> Bréb. et<br>Kütz. 1849; Syn.: <i>Scoliopleura</i><br><i>tumida</i> (Bréb. et Kütz.)<br>Rabenh. 1864; <i>Scoliotropis</i><br><i>tumida</i> (Bréb. et Kütz.)<br>Patrick et Freese 1961                                                                                                                                                                                                | + | - | - | - | - |
| <b>Sellaphoraceae Mereschk. 1902</b><br><b><i>Sellaphora</i> Mereschk. 1902</b>             |                                                                                                                                                                                                                                                                                                                                                                                                                  |   |   |   |   |   |
| <i>Sellaphora bacillum</i> (Ehrenb.) D.G. Mann 1989                                         | Bas.: <i>Navicula bacillum</i><br>Ehrenb. 1839                                                                                                                                                                                                                                                                                                                                                                   | + | - | - | - | - |
| <i>Sellaphora pupula</i> (Kütz.) Mereschk. 1902                                             | Bas.: <i>Navicula pupula</i><br>Kütz. 1844                                                                                                                                                                                                                                                                                                                                                                       | - | + | - | + | - |
| <i>Sellaphora hustedtii</i> (Krasske) Lange-Bert. et Werum<br>2004                          | <i>Navicula hustedtii</i> Krasske<br>1923                                                                                                                                                                                                                                                                                                                                                                        |   | + |   |   |   |

| 1                                                                   | 2                                                                                                                                                                                                   | 3 | 4 | 5 | 6 | 7 |
|---------------------------------------------------------------------|-----------------------------------------------------------------------------------------------------------------------------------------------------------------------------------------------------|---|---|---|---|---|
| <i>Sellaphora</i> sp.1PH                                            |                                                                                                                                                                                                     | - | - | + | - | - |
| <b><i>Fallacia</i> A. Stickle et D.G. Mann ex Round et al. 1990</b> |                                                                                                                                                                                                     |   |   |   |   |   |
| <i>Fallacia aequorea</i> (Hust.) D.G. Mann 1990*                    | Bas.: <i>Navicula aequorea</i> Hust. 1939                                                                                                                                                           | - | - | - | + | - |
| <i>Fallacia amphipleuroides</i> (Hust.) D.G. Mann 1990*             | Bas.: <i>Navicula amphipleuroides</i> Hust. 1955                                                                                                                                                    | - | - | - | + | - |
| <i>Fallacia cassubiae</i> Witkowski 1991*                           | Syn.: <i>Lyrella phyllophorae</i> Gusl. 1992                                                                                                                                                        | - | - | + | + | - |
| <i>Fallacia clepsidroides</i> Witkowski 1994*                       |                                                                                                                                                                                                     | - | - | - | + | + |
| <i>Fallacia escorialis</i> (Simonsen) Sabbe et Vyverman 1999*       | Bas.: <i>Navicula escorialis</i> Simonsen 1959                                                                                                                                                      | - | - | - | + | - |
| <i>Fallacia florinae</i> (Møller) Witkowski 1993*                   | Bas.: <i>Navicula florinae</i> Møller 1950                                                                                                                                                          | - | - | - | + | - |
| <i>Fallacia forcipata</i> (Grev.) A. Stickle et D.G. Mann 1990      | Bas.: <i>Navicula forcipata</i> Grev. 1859; Syn.: <i>Navicula lyra</i> var. <i>forcipata</i> (Grev.) O'Meara 1875; <i>Lyrella forcipata</i> var. <i>densestriata</i> (Grev.) Gusl. et Karayeva 1992 | + | + | + | + | + |
| <i>Fallacia inattingens</i> (Simonsen) D.G. Mann 1990               | Bas.: <i>Navicula inattingens</i> Simonsen 1959; Syn.: <i>Lyrella inattingens</i> (Simonsen) Gusl. et Karayeva 1992                                                                                 | - | - | + | - | - |
| <i>Fallacia litoricola</i> (Hust.) D.G. Mann 1990*                  | Bas.: <i>Navicula litoricola</i> Hust. 1955                                                                                                                                                         | - | - | - | + | - |
| <i>Fallacia margino-punctata</i> Sabbe et Vyverman 1999*            |                                                                                                                                                                                                     | - | - | - | + | - |
| <i>Fallacia nummularia</i> (Grev.) D.G. Mann 1990*                  | Bas.: <i>Navicula nummularia</i> Grev. 1859                                                                                                                                                         | - | - | - | + | - |
| <i>Fallacia ny</i> (Cleve) D.G. Mann 1990*                          | Bas.: <i>Navicula ny</i> Cleve 1894                                                                                                                                                                 | - | - | - | + | - |
| <i>Fallacia oculiformis</i> (Hust.) D.G. Mann 1990*                 | Bas.: <i>Navicula oculiformis</i> Hust. 1955                                                                                                                                                        | - | - | + | + | - |
| <i>Fallacia pulchella</i> Sabbe et Muylaert 1999*                   |                                                                                                                                                                                                     | - | - | - | + | - |
| <i>Fallacia pygmaea</i> (Kütz.) A. Stickle et D.G. Mann 1990        | Bas.: <i>Navicula pygmaea</i> Kütz. 1849; Syn.: <i>Navicula pygmaea</i> Kütz. emend Simonsen 1975; <i>Lyrella pygmaea</i> (Kütz.) I.V. Makarova et Karayeva 1987                                    | + | + | + | + | + |
| <i>Fallacia schaeferae</i> (Hust.) D.G. Mann 1990*                  | Bas.: <i>Navicula schaeferae</i> Hust. 1964                                                                                                                                                         | - | - | - | + | - |
| <i>Fallacia subforcipata</i> (Hust.) D.G. Mann 1990                 | Bas.: <i>Navicula subforcipata</i> Hust. 1964, Syn.: <i>Lyrella subforcipata</i> (Hust.) Gusl. et Karayeva 1992                                                                                     | - | - | + | + | + |
| <i>Fallacia tenera</i> (Hust.) D.G. Mann 1990                       | Bas.: <i>Navicula tenera</i> Hust. 1936, Syn.: <i>Navicula dissipata</i> Hust. 1936; <i>Lyrella dissipata</i> (Hust.) Gusl. et Karayeva 1992                                                        | - | - | + | + | - |
| <i>Fallacia versicolor</i> (Grunow) D.G. Mann 1990*                 | Bas.: <i>Navicula versicolor</i> Grunow 1874; Syn.: <i>Navicula</i>                                                                                                                                 | - | - | + | + | - |



[illegible]

| 1                                                                            | 2                                                                                                                                                                                                                                                                                           | 3 | 4 | 5 | 6 | 7 |
|------------------------------------------------------------------------------|---------------------------------------------------------------------------------------------------------------------------------------------------------------------------------------------------------------------------------------------------------------------------------------------|---|---|---|---|---|
| <i>Caloneis aemula</i> (Grunow ex A.W.F. Schmidt) Cleve 1894*                | Bas.: <i>Navicula aemula</i><br>Grunow ex A.W.F. Schmidt 1874                                                                                                                                                                                                                               | - | - | - | + | - |
| <i>Caloneis amphisbaena</i> (Bory) Cleve 1894                                | Bas.: <i>Navicula amphisbaena</i><br>Bory 1824                                                                                                                                                                                                                                              | - | + | + | + | - |
| <i>Caloneis amphisbaena</i> var. <i>aequata</i> Kolbe 1927                   |                                                                                                                                                                                                                                                                                             | - | - | + | + | - |
| <i>Caloneis amphisbaena</i> var. <i>subsalina</i> (Donkin) Cleve 1894        | Bas.: <i>Navicula subsalina</i><br>Donkin 1870; Syn.: <i>Caloneis subsalina</i> (Donkin) Hendey 1951                                                                                                                                                                                        | - | - | + | + | - |
| <i>Caloneis bacillum</i> (Grunow) Cleve 1894                                 | Bas.: <i>Stauroneis bacillum</i><br>Grunow 1863                                                                                                                                                                                                                                             | - | - | - | + | - |
| <i>Caloneis densestriata</i> (Proschk.-Lavr.) Gusl. 1992                     | Bas.: <i>Caloneis formosa</i> var. <i>densestriata</i> Proschk.-Lavr. 1963; Syn.: <i>Caloneis westii</i> var. <i>densestriata</i> (Proschk.-Lavr.) VanLand. 1968                                                                                                                            | + | + | + | + | + |
| <i>Caloneis lancettula</i> (Schulz) Lange-Bert. et Witkowski 1996*           | Bas.: <i>Caloneis aemula</i> var. <i>lancettula</i> Schulz 1926; Syn.: <i>Caloneis bacillum</i> var. <i>lancettula</i> (Schulz) Hust. 1930                                                                                                                                                  | - | - | - | + | - |
| <i>Caloneis liber</i> (W. Sm.) Cleve 1894                                    | Bas.: <i>Navicula liber</i> W. Sm. 1853                                                                                                                                                                                                                                                     | + | + | + | + | + |
| <i>Caloneis liber</i> var. <i>bicuneata</i> (Grunow) Cleve 1894              | Bas.: <i>Navicula bicuneata</i><br>Grunow 1860; Syn.: <i>Caloneis liber</i> var. <i>bicuneata</i> (Grunow) Nizam. 1982                                                                                                                                                                      | - | - | + | + | - |
| <i>Caloneis liber</i> var. <i>linearis</i> Cleve 1894                        | Bas.: <i>Navicula linearis</i><br>Grunow 1860                                                                                                                                                                                                                                               | + | + | - | - | + |
| <i>Caloneis</i> cf. <i>liber</i> (W. Sm.) Cleve 1894                         |                                                                                                                                                                                                                                                                                             | - | - | - | + | - |
| <i>Caloneis oregonica</i> (Ehrenb.) R.M. Patrick 1966                        | Bas.: <i>Pinnularia oregonica</i><br>Ehrenb. 1845; Syn.: <i>Navicula oregonica</i> (Ehrenb.) Kütz. 1849                                                                                                                                                                                     | - | - | + | - | - |
| <i>Caloneis probabilis</i> (A.W.F. Schmidt) Cleve 1894                       | Bas.: <i>Navicula probabilis</i><br>A.W.F. Schmidt 1877                                                                                                                                                                                                                                     | - | - | + | + | - |
| <i>Caloneis probabilis</i> var. <i>pinnularioides</i> Proschk.-Lavr. 1963    |                                                                                                                                                                                                                                                                                             | - | - | + | + | - |
| <i>Caloneis schumanniana</i> var. <i>biconstricta</i> (Grunow) Reichelt 1903 | Bas.: <i>Navicula trochus</i> var. <i>biconstricta</i> Grunow 1878; Syn.: <i>Navicula schumanniana</i> var. <i>biconstricta</i> (Grunow) Grunow ex Van Heurck 1880; <i>Navicula biconstricta</i> (Grunow) Perag. 1903, <i>Caloneis trochus</i> var. <i>biconstricta</i> (Grunow) Mayer 1941 | - | - | - | + | - |
| <i>Caloneis silicula</i> (Ehrenb.) Cleve 1894                                | Bas.: <i>Navicula silicula</i><br>Ehrenb. 1843                                                                                                                                                                                                                                              | - | + | + | + | - |

| 1                                                                                     | 2                                                                                                                                                                   | 3 | 4 | 5 | 6 | 7 |
|---------------------------------------------------------------------------------------|---------------------------------------------------------------------------------------------------------------------------------------------------------------------|---|---|---|---|---|
| <i>Caloneis westii</i> (W. Sm.) Hendey 1964                                           | Bas.: <i>Navicula westii</i> W. Sm. 1853, <i>Navicula tumida</i> var. <i>westii</i> (W. Sm.) Cleve-Euler 1953, <i>Scoliopleura westii</i> (W. Sm.) Grunow 1860      | + | + | + | + | + |
| <i>Caloneis</i> sp.1                                                                  |                                                                                                                                                                     | - | - | - | + | - |
| <i>Caloneis</i> sp.2                                                                  |                                                                                                                                                                     | - | - | - | + | - |
| <i>Caloneis</i> sp.3                                                                  |                                                                                                                                                                     | - | - | - | + | - |
| <i>Caloneis</i> sp.4                                                                  |                                                                                                                                                                     | - | - | - | + | - |
| <i>Caloneis</i> sp.5                                                                  |                                                                                                                                                                     | - | - | - | + | - |
| <b><i>Diatomella</i> Grev. 1855</b>                                                   |                                                                                                                                                                     |   |   |   |   |   |
| <i>Diatomella minuta</i> Hust. ex A.W.F. Schmidt et al. 1936*                         |                                                                                                                                                                     | - | - | + | - | - |
| <b><i>Oestrupia</i> Heiden ex Hust. 1935</b>                                          |                                                                                                                                                                     |   |   |   |   |   |
| <i>Oestrupia powellii</i> (F.W. Lewis) Heiden ex Hust. 1935*                          | Bas.: <i>Navicula powellii</i> Lewis 1861; Syn.: <i>Caloneis powellii</i> (Lewis) Cleve 1894; <i>Oestrupia powelli</i> (Lewis) Heiden ex A.W.F. Schmidt et al. 1906 | - | - | - | + | - |
| <b>Diploneidaceae D.G. Mann 1990</b><br><b><i>Diploneis</i> Ehrenb. ex Cleve 1894</b> |                                                                                                                                                                     |   |   |   |   |   |
| <i>Diploneis bombus</i> (Ehrenb.) Cleve-Euler 1922                                    | Bas.: <i>Diploneis bombus</i> Ehrenb. 1844; Syn.: <i>Navicula bombus</i> (Ehrenb.) Kütz. 1849                                                                       | + | + | + | + | + |
| <i>Diploneis chersonensis</i> (Grunow) Cleve 1892                                     | Bas.: <i>Navicula chersonensis</i> Grunow ex A.W.F. Schmidt et al. 1875                                                                                             | + | + | + | + | + |
| <i>Diploneis coffaeiformis</i> (A.W.F. Schmidt) Cleve 1894*                           | Bas.: <i>Navicula coffaeiformis</i> A.W.F. Schmidt ex Schmidt et al. 1881                                                                                           | - | - | + | + | - |
| <i>Diploneis crabro</i> (Ehrenb.) Ehrenb. 1854                                        | Bas.: <i>Pinnularia crabro</i> Ehrenb. 1844                                                                                                                         | + | - | + | + | + |
| <i>Diploneis crabro</i> var. <i>pandura</i> (Bréb.) Cleve 1894                        | Bas.: <i>Navicula pandura</i> Bréb. 1854                                                                                                                            | + | - | + | + | - |
| <i>Diploneis didyma</i> Ehrenb. 1839                                                  | Bas.: <i>Pinnularia didyma</i> Ehrenb. 1840; Syn.: <i>Navicula didyma</i> (Ehrenb.) Kütz. 1844                                                                      | + | + | + | + | - |
| <i>Diploneis divergens</i> (A.W.F. Schmidt) Cleve 1894*                               | Bas.: <i>Navicula divergens</i> A.W.F. Schmidt 1875                                                                                                                 | - | - | - | + | + |
| <i>Diploneis elliptica</i> (Kütz.) Cleve 1894                                         | Bas.: <i>Navicula elliptica</i> Kütz. 1844                                                                                                                          | - | + | - | - | - |
| <i>Diploneis finnica</i> (Ehrenb.) Cleve 1891*                                        | Bas.: <i>Cocconeis finnica</i> Ehrenb. 1838; Syn.: <i>Navicula finnica</i> (Ehrenb.) F.W. Mills 1934                                                                | - | - | + | - | - |
| <i>Diploneis fusca</i> (W. Greg.) Cleve 1894                                          | Bas.: <i>Navicula smithii</i> var. <i>fusca</i> (W. Greg.) 1857                                                                                                     | + | + | + | + | + |
| <i>Diploneis fusca</i> var. <i>delicata</i> A.W.F. Schmidt 1894                       | Bas.: <i>Navicula fusca</i> var. <i>delicata</i> A.W.F. Schmidt 1874; Syn.: <i>Diploneis aestiva</i>                                                                | + | - | - | - | - |

| 1                                                                      | 2                                                                                                                                                                                                    | 3 | 4 | 5 | 6 | 7 |
|------------------------------------------------------------------------|------------------------------------------------------------------------------------------------------------------------------------------------------------------------------------------------------|---|---|---|---|---|
|                                                                        | var. <i>delicata</i> (A.W.F. Schmidt) R. Ross ex Hartley 1986                                                                                                                                        |   |   |   |   |   |
| <i>Diploneis gemmata</i> (Grev.) Cleve 1894                            | Bas.: <i>Navicula gemmata</i> Grev. 1859                                                                                                                                                             | - | - | + | - | - |
| <i>Diploneis gemmata</i> var. <i>pristiophora</i> (Janisch) Cleve 1894 | Bas.: <i>Navicula pristiophora</i> Janisch ex A.W.F. Schmidt et al. 1881; Syn.: <i>Diploneis gemmatula</i> var. <i>pristiophora</i> (Janisch ex A.W.F. Schmidt et al.) Fricke 1902                   | - | - | - | + | - |
| <i>Diploneis incurvata</i> (W. Greg.) Cleve 1894                       | Bas.: <i>Navicula incurvata</i> (W. Greg.) 1856; Syn.: <i>Navicula splendida</i> var. <i>incurvata</i> (W. Greg.) Rabenh. 1864                                                                       | + | - | - | + | - |
| <i>Diploneis interrupta</i> (Kütz.) Cleve 1894                         | Bas.: <i>Navicula interrupta</i> Kütz. 1844                                                                                                                                                          | - | + | + | + | - |
| <i>Diploneis interrupta</i> var. <i>heeri</i> (Pant.) Hust. 1937       | Bas.: <i>Navicula heeri</i> Pant. 1889                                                                                                                                                               | - | + | - | - | - |
| <i>Diploneis lineata</i> (Donkin) Cleve 1894                           | Bas.: <i>Navicula lineata</i> Donkin 1858                                                                                                                                                            | - | - | + | + | - |
| <i>Diploneis litoralis</i> (Donkin) Cleve 1894                         | Bas.: <i>Navicula littoralis</i> Donkin 1870                                                                                                                                                         | - | + | + | + | + |
| <i>Diploneis mirabilis</i> König 1959*                                 |                                                                                                                                                                                                      | - | - | + | + | - |
| <i>Diploneis nitescens</i> (W. Greg.) Cleve 1894*                      | Bas.: <i>Navicula smithii</i> var. <i>nitescens</i> W. Greg. 1857; Syn.: <i>Navicula nitescens</i> (W. Greg.) W. Greg. 1857; <i>Navicula nitescens</i> (W. Greg.) Ralfs ex A. Pritch. 1861           | - | - | + | - | - |
| <i>Diploneis notabilis</i> (Grev.) Cleve 1894                          | Bas.: <i>Navicula notabilis</i> Grev. 1863                                                                                                                                                           | + | + | + | + | + |
| <i>Diploneis notabilis</i> var. <i>tenera</i> Proschk.-Lavr. 1963      |                                                                                                                                                                                                      | - | + | + | + | + |
| <i>Diploneis oblongella</i> (Nägeli) Cleve-Euler 1922                  | Bas.: <i>Navicula oblongella</i> Nägeli ex Kütz. 1849; Syn.: <i>Diploneis ovalis</i> var. <i>oblongella</i> (Nägeli ex Kütz.) Cleve 1894; <i>Diploneis oblongella</i> (Nägeli ex Kütz.) R. Ross 1947 | - | + | + | + | - |
| <i>Diploneis oculata</i> (Bréb.) Cleve 1894                            | Bas.: <i>Navicula oculata</i> Bréb. ex Desm. 1854                                                                                                                                                    | - | - | + | + | - |
| <i>Diploneis ovalis</i> (Hilse) Cleve 1891                             | Bas.: <i>Pinnularia ovalis</i> Hilse 1860                                                                                                                                                            | - | + | + | - | - |
| <i>Diploneis papula</i> (A.W.F. Schmidt) Cleve 1894                    | Bas.: <i>Navicula papula</i> A.W.F. Schmidt 1875                                                                                                                                                     | + | + | + | + | + |
| <i>Diploneis parca</i> (A.W.F. Schmidt) Boyer 1927                     | Bas.: <i>Navicula parca</i> A.W.F. Schmidt 1875                                                                                                                                                      | - | - | - | + | - |
| <i>Diploneis pseudovalis</i> Hust. 1930                                |                                                                                                                                                                                                      | - | + | + | - | - |
| <i>Diploneis rex</i> Droop 1996                                        |                                                                                                                                                                                                      | - | - | - | + | - |
| <i>Diploneis smithii</i> (Bréb.) Cleve 1894                            | Bas.: <i>Navicula smithii</i> Bréb. ex W. Sm. 1856                                                                                                                                                   | + | + | + | + | + |

| 1                                                                                               | 2                                                                                                                                                                                                                 | 3 | 4 | 5 | 6 | 7 |
|-------------------------------------------------------------------------------------------------|-------------------------------------------------------------------------------------------------------------------------------------------------------------------------------------------------------------------|---|---|---|---|---|
| <i>Diploneis smithii</i> var. <i>constricta</i> Heiden 1928                                     |                                                                                                                                                                                                                   | - | + | + | + | - |
| <i>Diploneis smithii</i> var. <i>pumila</i> (Grunow) Hust. 1937                                 | Bas.: <i>Navicula ovalis</i> var. <i>pumila</i> Grunow 1882; Syn.: <i>Diploneis oblongella</i> var. <i>pumila</i> (Grunow) Woodhead et Tweed 1960; <i>Diploneis ovalis</i> var. <i>pumila</i> (Grunow) Cleve 1894 | - | + | + | + | + |
| <i>Diploneis smithii</i> var. <i>recta</i> Perag. 1911*                                         | Bas.: <i>Navicula smithii</i> var. <i>recta</i> (Perag.) F.W. Mills 1934                                                                                                                                          | - | - | + | + | - |
| <i>Diploneis smithii</i> f. <i>rhombica</i> (Mereschk.) Hust. 1937                              | Bas.: <i>Diploneis smithii</i> var. <i>rhombica</i> Mereschk. 1902                                                                                                                                                | - | + | + | - | - |
| <i>Diploneis splendida</i> (W. Greg.) Cleve 1894                                                | Bas.: <i>Navicula splendida</i> (W. Greg.) 1856                                                                                                                                                                   | - | - | + | + | - |
| <i>Diploneis stroemi</i> Hust. 1937*                                                            |                                                                                                                                                                                                                   | - | - | - | + | - |
| <i>Diploneis subadvena</i> Hust. 1937                                                           |                                                                                                                                                                                                                   | + | + | + | + | - |
| <i>Diploneis subcincta</i> (A.W.F. Schmidt) Cleve 1894                                          | Bas.: <i>Navicula subcincta</i> A.W.F. Schmidt 1874                                                                                                                                                               | - | - | - | + | - |
| <i>Diploneis suborbicularis</i> (W. Greg.) Cleve 1894                                           | Bas.: <i>Navicula suborbicularis</i> var. <i>densestriata</i> W. Greg.                                                                                                                                            | + | - | - | + | + |
| <i>Diploneis vacillans</i> (A.W.F. Schmidt) Cleve 1894                                          | Bas.: <i>Navicula vacillans</i> A.W.F. Schmidt 1875                                                                                                                                                               | + | + | + | + | + |
| <i>Diploneis vetula</i> (A.W.F. Schmidt) Cleve 1894*                                            | Bas.: <i>Navicula vetula</i> A.W.F. Schmidt 1875                                                                                                                                                                  | - | - | - | + | + |
| <i>Diploneis</i> sp.1                                                                           |                                                                                                                                                                                                                   | - | - | - | + | + |
| <i>Diploneis</i> sp.1F                                                                          |                                                                                                                                                                                                                   | - | - | - | + | - |
| <i>Diploneis</i> sp.1VS                                                                         |                                                                                                                                                                                                                   | - | - | + | + | - |
| <i>Diploneis</i> sp.3                                                                           |                                                                                                                                                                                                                   | - | - | - | + | - |
| <i>Diploneis</i> sp.4                                                                           |                                                                                                                                                                                                                   | - | - | - | + | - |
| <i>Diploneis</i> sp.5                                                                           |                                                                                                                                                                                                                   | - | - | - | + | - |
| <b>Naviculaceae Kütz. 1844</b><br><b><i>Navicula</i> Bory 1822</b>                              |                                                                                                                                                                                                                   |   |   |   |   |   |
| <i>Navicula agnita</i> Hust. 1955*                                                              |                                                                                                                                                                                                                   | - | - | - | + | - |
| <i>Navicula aleksandrae</i> Lange-Bert., Witkowski, Bogaczewicz-Adamczak et Zgrundo 2003*       |                                                                                                                                                                                                                   | - | - | - | + | - |
| <i>Navicula ammophila</i> var. <i>flanatica</i> (Grunow) Cleve 1885                             | Bas.: <i>Navicula flanatica</i> Grunow 1860; Syn.: <i>Navicula angustata</i> var. <i>flanatica</i> (Grunow) Rabenh. 1864                                                                                          | - | - | - | + | - |
| <i>Navicula arenaria</i> Donkin 1861*                                                           |                                                                                                                                                                                                                   | - | - | - | + | - |
| <i>Navicula besarensis</i> Giffen 1980*                                                         | Syn.: <i>Navicula agnita</i> Hust. 1961-1966 non <i>Navicula agnita</i> Hust. 1955; <i>Navicula biagnita</i> Simonsen 1987                                                                                        | - | - | - | + | - |
| <i>Navicula bicapitellata</i> Hust. 1925                                                        |                                                                                                                                                                                                                   | - | + | - | - | - |
| <i>Navicula biskanterae</i> Hust. 1939*                                                         |                                                                                                                                                                                                                   | - | - | - | + | - |
| <i>Navicula bozenae</i> Lange-Bert., Witkowski, Bogaczewicz-Adamczak et Zgrundo 2003*           |                                                                                                                                                                                                                   | - | - | - | + | - |
| <i>Navicula</i> cf. <i>bozenae</i> Lange-Bert., Witkowski, Bogaczewicz-Adamchak et Zgrundo 2003 |                                                                                                                                                                                                                   | - | - | - | + | - |

| 1                                                                                             | 2                                                                                                                                                                                                                                | 3 | 4 | 5 | 6 | 7 |
|-----------------------------------------------------------------------------------------------|----------------------------------------------------------------------------------------------------------------------------------------------------------------------------------------------------------------------------------|---|---|---|---|---|
| <i>Navicula cancellata</i> Donkin 1872                                                        | Syn.: <i>Navicula retusa</i> var. <i>cancellata</i> (Donkin) R. Ross 1986                                                                                                                                                        | + | + | + | + | + |
| <i>Navicula</i> cf. <i>cancellata</i> Donkin 1872                                             |                                                                                                                                                                                                                                  | - | - | - | + | - |
| <i>Navicula capitatoradiata</i> Germain 1981                                                  | Repl. syn.: <i>Navicula cryptocephala</i> Kütz. var. <i>intermedia</i> Grunow 1880                                                                                                                                               | - | + | - | + | - |
| <i>Navicula capillata</i> Giffen 1980*                                                        |                                                                                                                                                                                                                                  | - | - | - | + | - |
| <i>Navicula duerrenbergiana</i> Hust. 1934*                                                   | Syn.: <i>Navicula stundlii</i> Hust. 1959                                                                                                                                                                                        | - | - | - | + | - |
| <i>Navicula fauta</i> Hust. 1954*                                                             |                                                                                                                                                                                                                                  | - | - | - | + | - |
| <i>Navicula flagellifera</i> Hust. 1939*                                                      |                                                                                                                                                                                                                                  | - | - | - | + | - |
| <i>Navicula</i> cf. <i>flagellifera</i> Hust. 1939                                            |                                                                                                                                                                                                                                  | - | - | - | + | - |
| <i>Navicula lusoria</i> Giffen 1975*                                                          |                                                                                                                                                                                                                                  | - | - | - | + | - |
| <i>Navicula mahoodii</i> Witkowski et Witon 2000*                                             |                                                                                                                                                                                                                                  | - | - | - | + | - |
| <i>Navicula mollis</i> (W. Sm.) Cleve 1895*                                                   | Bas.: <i>Schizomena mole</i> W. Sm. 1853                                                                                                                                                                                         | - | - | - | + | - |
| <i>Navicula opima</i> (Grunow) Grunow 1876*                                                   | Syn.: <i>Navicula fortis</i> var. <i>opima</i> Grunow 1867                                                                                                                                                                       | - | - | - | + | - |
| <i>Navicula pagophila</i> Grunow 1884*                                                        |                                                                                                                                                                                                                                  | - | - | - | + | - |
| <i>Navicula syvertsenii</i> Witkowski, Metzeltin et Lange-Bert. 1996*                         |                                                                                                                                                                                                                                  | - | - | - | + | - |
| <i>Navicula tripunctata</i> (O.F. Müll.) Bory 1827*                                           | Bas.: <i>Vibrio tripunctatus</i> O.F. Müll. 1786                                                                                                                                                                                 | - | - | - | + | - |
| <i>Navicula cincta</i> (Ehrenb.) Ralfs 1861                                                   | Bas.: <i>Pinnularia cincta</i> Ehrenb. 1854                                                                                                                                                                                      | + | - | + | + | - |
| <i>Navicula cryptocephala</i> Kütz. 1844                                                      |                                                                                                                                                                                                                                  | + | + | + | + | + |
| <i>Navicula cryptotenella</i> Lange-Bert. 1985                                                |                                                                                                                                                                                                                                  | - | + | - | - | - |
| <i>Navicula digitoradiata</i> (W. Greg.) Ralfs 1861                                           | Bas.: <i>Pinnularia digitoradiata</i> W. Greg. 1856                                                                                                                                                                              | + | + | + | + | + |
| <i>Navicula digitoradiata</i> var. <i>cyprinus</i> (Ehrenb.) Van Heurck 1885                  | Bas.: <i>Pinnularia cyprinus</i> Ehrenb. 1843; Syn.: <i>Pinnularia digitoradiata</i> var. <i>cyprinus</i> (Ehrenb.) F.W. Mills 1934; <i>Navicula cyprinus</i> (Ehrenb.) Kütz. 1844; <i>Navicula cyprinus</i> (Schum.) Cleve 1895 | + | + | + | + | - |
| <i>Navicula directa</i> (W. Sm.) Ralfs ex A. Pritch. 1861                                     | Bas.: <i>Pinnularia directa</i> W. Sm. 1853; Syn.: <i>Navicula directa</i> (W. Sm.) Bréb. 1854                                                                                                                                   | + | + | + | + | + |
| <i>Navicula distans</i> (W. Sm.) Ralfs ex A. Pritch. 1861                                     | Bas.: <i>Pinnularia distans</i> W. Sm. 1853; Syn.: <i>Navicula distans</i> (W. Sm.) Bréb. 1854                                                                                                                                   | + | + | + | + | + |
| <i>Navicula erifuga</i> Lange-Bert. 1986*                                                     | Syn.: <i>Navicula leptcephala</i> Bréb. ex Grunow ex Van Heurck 1880 non <i>Navicula leptcephala</i> Rabenh. 1853                                                                                                                | - | - | - | + | - |
| <i>Navicula germanopolonica</i> Lange-Bert., Witkowski, Bogaczewicz-Adamchak et Zgrundo 2003* |                                                                                                                                                                                                                                  | - | - | - | + | - |

| 1                                                                                  | 2                                                                                                                                                                                                                                       | 3 | 4 | 5 | 6 | 7 |
|------------------------------------------------------------------------------------|-----------------------------------------------------------------------------------------------------------------------------------------------------------------------------------------------------------------------------------------|---|---|---|---|---|
| <i>Navicula glabriuscula</i> var. <i>elipsoidales</i> Proschk.-Lavr. 1963***       |                                                                                                                                                                                                                                         | - | - | + | + | - |
| <i>Navicula gomphonematoides</i> Gusl. 1992                                        |                                                                                                                                                                                                                                         | - | - | + | - | - |
| <i>Navicula gottlandica</i> Grunow ex Van Heurck 1880                              |                                                                                                                                                                                                                                         | - | - | + | + | - |
| <i>Navicula gregaria</i> Donkin 1861                                               |                                                                                                                                                                                                                                         | + | + | + | + | - |
| <i>Navicula hamiltonii</i> Witkowski, Lange-Bert. et Metzeltin 2000*               |                                                                                                                                                                                                                                         | - | - | - | + | - |
| <i>Navicula imperfecta</i> Cleve 1883*                                             |                                                                                                                                                                                                                                         | - | - | - | + | + |
| <i>Navicula johanrossii</i> Giffen 1967*                                           |                                                                                                                                                                                                                                         | - | - | + | - | - |
| <i>Navicula lanceolata</i> (C. Agardh) Kütz. 1844                                  | Bas.: <i>Frustulia lanceolata</i> C. Agardh 1827; Syn.: <i>Cymbella lanceolata</i> (C. Agardh) C. Agardh 1830                                                                                                                           | - | + | + | - | - |
| <i>Navicula laterostrata</i> Hust. 1925                                            | Syn.: <i>Navicula inflata</i> var. <i>laterostrata</i> (Hust.) Cleve-Euler 1953 as <i>Navicula inflata</i> 'beta' <i>laterostrata</i>                                                                                                   | - | + | + | - | - |
| <i>Navicula latissima</i> var. <i>capitata</i> Pant. 1889                          |                                                                                                                                                                                                                                         | - | + | - | + | + |
| <i>Navicula latissima</i> var. <i>elongata</i> (Pant.) Cleve 1895                  | Bas.: <i>Navicula humerosa</i> var. <i>elongata</i> Pant. 1889                                                                                                                                                                          | - | - | - | + | + |
| <i>Navicula longirostris</i> Hust. 1930                                            |                                                                                                                                                                                                                                         | - | + | - | - | - |
| <i>Navicula meniscus</i> Schum. 1867                                               | Syn.: <i>Navicula meniscus</i> var. <i>meniscus</i> (Schum.) Cleve-Euler 1922; <i>Navicula peregrina</i> var. <i>meniscus</i> (Schum.) Grunow ex Van Heurck 1880; <i>Navicula peregrina</i> var. <i>meniscus</i> (Schum.) A. Mayer 1912 | - | + | + | + | - |
| <i>Navicula northumbrica</i> Donkin 1861*                                          |                                                                                                                                                                                                                                         | - | - | + | + | + |
| <i>Navicula palpebralis</i> Bréb. 1853                                             |                                                                                                                                                                                                                                         | + | + | + | + | + |
| <i>Navicula palpebralis</i> var. <i>angulosa</i> (W. Greg.) Van Heurck 1885        | Bas.: <i>Navicula angulosa</i> W. Greg. 1856                                                                                                                                                                                            | - | - | + | + | - |
| <i>Navicula palpebralis</i> var. <i>minor</i> Grunow 1880                          |                                                                                                                                                                                                                                         | + | - | - | + | - |
| <i>Navicula palpebralis</i> var. <i>semitiplena</i> (W. Greg. ex Grev.) Cleve 1895 | Bas.: <i>Pinnularia semiplena</i> Grev. 1859; Syn.: <i>Navicula semiplena</i> (W. Greg. ex Grev.) Donkin 1871                                                                                                                           | + | + | + | + | + |
| <i>Navicula palpebrulum</i> Cholnoky 1961*                                         |                                                                                                                                                                                                                                         | - | - | - | + | - |
| <i>Navicula parapontica</i> Witkowski, Kulikovskiy, Nevrova et Lange-Bert. 2010**  | Bas.: <i>Navicula pennata</i> var. <i>pontica</i> Mereschk. 1902                                                                                                                                                                        | - | - | + | + | - |
| <i>Navicula peregrina</i> (Ehrenb.) Kütz. 1844                                     | Bas.: <i>Pinnularia peregrina</i> Ehrenb. 1843; Syn.: <i>Navicula peregrina</i> var. <i>genuina</i> Mayer 1913                                                                                                                          | - | + | + | + | - |
| <i>Navicula perminuta</i> Grunow ex Van Heurck 1880                                | Syn.: <i>Navicula cryptocephala</i> var. <i>perminuta</i> (Grunow ex Van Heurck) Cleve 1895                                                                                                                                             | - | - | + | + | - |
| <i>Navicula</i> cf. <i>perminuta</i> Grunow ex Van Heurck 1880                     |                                                                                                                                                                                                                                         | - | - | - | + | - |
| <i>Navicula phyllepta</i> Kütz. 1844*                                              | Syn.: <i>Navicula minuscula</i> var.                                                                                                                                                                                                    | - | - | - | + | - |

| 1                                                                               | 2                                                                                                                                                                                                                                                                                                                                                              | 3 | 4 | 5 | 6 | 7 |
|---------------------------------------------------------------------------------|----------------------------------------------------------------------------------------------------------------------------------------------------------------------------------------------------------------------------------------------------------------------------------------------------------------------------------------------------------------|---|---|---|---|---|
|                                                                                 | <i>istriana</i> Grunow ex Van<br>Heurck 1880; <i>Navicula</i><br><i>lanceolata</i> var. <i>phyllepta</i><br>(Kütz.) Van Heurck 1885                                                                                                                                                                                                                            |   |   |   |   |   |
| <i>Navicula phylleptosoma</i> Lange-Bert. 1999*                                 | Syn.: <i>Navicula phyllepta</i> auct<br>partim non Kütz. 1844                                                                                                                                                                                                                                                                                                  | - | - | - | + | - |
| <i>Navicula</i> cf. <i>phylleptosoma</i> Lange-Bert. 1999                       |                                                                                                                                                                                                                                                                                                                                                                | - | - | - | + | - |
| <i>Navicula pi</i> Cleve 1893                                                   |                                                                                                                                                                                                                                                                                                                                                                | - | + | + | + | + |
| <i>Navicula plicatoides</i> Hust. 1962                                          |                                                                                                                                                                                                                                                                                                                                                                | + | - | - | - | - |
| <i>Navicula pontica</i> Witkowski, Kulikovskiy, Nevrova et<br>Lange-Bert. 2010  | Bas.: <i>Navicula pennata</i> var.<br><i>pontica</i> Mereschk. 1902                                                                                                                                                                                                                                                                                            | + | + | + | + | + |
| <i>Navicula pseudocrassirostris</i> Hust. 1961*                                 |                                                                                                                                                                                                                                                                                                                                                                | - | - | - | + | - |
| <i>Navicula pseudopalpebralis</i> Hendey 1964*                                  |                                                                                                                                                                                                                                                                                                                                                                | - | - | - | + | - |
| <i>Navicula punctulata</i> W. Sm.                                               |                                                                                                                                                                                                                                                                                                                                                                | - | - | - | + | + |
| <i>Navicula radiosa</i> Kütz. 1844                                              |                                                                                                                                                                                                                                                                                                                                                                | + | + | + | + | - |
| <i>Navicula radiosa</i> var. <i>tenella</i> (Bréb. ex Kütz.) Van<br>Heurck 1885 | Bas.: <i>Navicula tenella</i> Bréb. ex<br>Kütz. 1849; Syn.: <i>Navicula</i><br><i>radiosa</i> var. <i>tenella</i> (Bréb. ex<br>Kütz.) Cleve et J.D. Möller<br>1879                                                                                                                                                                                             | + | + | - | - | - |
| <i>Navicula ramosissima</i> (C. Agardh) Cleve 1893                              | Bas.: <i>Schizonema</i><br><i>ramosissimum</i> C. Agardh<br>1824                                                                                                                                                                                                                                                                                               | + | + | + | + | + |
| <i>Navicula ramosissima</i> f. <i>caspia</i> (Grunow) Cleve 1895                | Bas.: <i>Navicula ramosissima</i> f.<br><i>caspia</i> Grunow                                                                                                                                                                                                                                                                                                   | + | - | - | - | - |
| <i>Navicula reinhardti</i> (Grunow) Grunow 1880                                 | Syn.: <i>Stauroneis reinhardtii</i><br>Grunow 1860                                                                                                                                                                                                                                                                                                             | - | - | + | - | - |
| <i>Navicula rhombica</i> W. Greg. 1856                                          |                                                                                                                                                                                                                                                                                                                                                                | + | - | + | + | + |
| <i>Navicula rhynchocephala</i> Kütz. 1844                                       |                                                                                                                                                                                                                                                                                                                                                                | + | - | + | - | - |
| <i>Navicula salinarum</i> Grunow 1880                                           |                                                                                                                                                                                                                                                                                                                                                                | + | + | + | + | + |
| <i>Navicula salinarum</i> f. <i>capitata</i> Schulz 1926                        |                                                                                                                                                                                                                                                                                                                                                                | - | + | - | - | - |
| <i>Navicula salinicola</i> Hust. 1939                                           | Syn.: <i>Navicula incerta</i><br>Grunow ex Van Heurck<br>1880 non Ehrenb.; <i>Navicula</i><br><i>incertata</i> Lange-Bert. 1985                                                                                                                                                                                                                                | - | - | - | + | - |
| <i>Navicula</i> cf. <i>salinicola</i> Hust. 1939                                |                                                                                                                                                                                                                                                                                                                                                                | - | - | - | + | - |
| <i>Navicula petrovii</i> Nevrova, Witkowski, Kociolek et<br>Lange-Bert. 2014**  | Bas.: <i>Amphora scabriuscula</i><br>Cleve et Grove ex Cleve<br>1893; Syn.: <i>Alloioneis</i><br><i>scabriuscula</i> (Cleve et Grove)<br>Mereschk. 1902; <i>Stauroptera</i><br><i>scalaris</i> Ehrenb. 1841;<br><i>Pinnularia borealis</i> var.<br><i>scalaris</i> (Ehrenb.) Cleve 1895;<br><i>Navicula scabriuscula</i> (Cleve<br>et Grove) Mereschk. 1902*** | - | - | - | + | + |
| <i>Navicula stachurae</i> Witkowski, Lange-Bert. et Metzeltin<br>2000*          |                                                                                                                                                                                                                                                                                                                                                                | - | - | - | + | - |
| <i>Navicula subrostellata</i> Hust. 1955                                        |                                                                                                                                                                                                                                                                                                                                                                | - | - | + | + | - |
| <i>Navicula tripunctata</i> (O.F. Müll.) Bory 1827                              | Bas.: <i>Vibrio tripunctatus</i> O.F.                                                                                                                                                                                                                                                                                                                          | - | + | - | + | - |



| 1                                                                                                                | 2                                                                                                                                                                                                                                                                              | 3 | 4 | 5 | 6 | 7 |
|------------------------------------------------------------------------------------------------------------------|--------------------------------------------------------------------------------------------------------------------------------------------------------------------------------------------------------------------------------------------------------------------------------|---|---|---|---|---|
|                                                                                                                  | Müll. 1786                                                                                                                                                                                                                                                                     |   |   |   |   |   |
| <i>Navicula trivialis</i> Lange-Bert. 1980                                                                       |                                                                                                                                                                                                                                                                                | + | - | - | - | - |
| <i>Navicula veneta</i> Kütz. 1844                                                                                | Syn.: <i>Navicula cryptocephala</i> var. <i>veneta</i> (Kütz.) Rabenh. 1864; <i>Navicula cryptocephala</i> f. <i>veneta</i> (Kütz.) Hust. 1957                                                                                                                                 | + | - | + | + | - |
| <i>Navicula viminoides</i> Giffen 1975*                                                                          |                                                                                                                                                                                                                                                                                | - | - | - | + | - |
| <i>Navicula viminoides</i> var. <i>cosmomarina</i> Lange-Bert., Witkowski, Bogaczewicz-Adamchak et Zgrundo 2003* |                                                                                                                                                                                                                                                                                | - | - | - | + | - |
| <i>Navicula viridula</i> (Kütz.) Ehrenb 1836                                                                     | Bas.: <i>Frustulia viridula</i> Kütz. 1833; Syn.: <i>Pinnularia viridula</i> (Kütz.) Rabenh. 1853; <i>Pinnularia viridula</i> (Ehrenb.) Ehrenb. 1843                                                                                                                           | - | + | + | - | - |
| <i>Navicula viridula</i> var. <i>rostellata</i> (Kütz.) Cleve 1895                                               | Bas.: <i>Navicula rostellata</i> Kütz. 1844; Syn.: <i>Navicula rhynchocephala</i> var. <i>rostellata</i> (Kütz.) Cleve et Grunow 1880; <i>Navicula rostellata</i> var. <i>minor</i> (Grunow ex Van Heurck) Cleve-Euler 1953; <i>Pinnularia rostellata</i> (Kütz.) Rabenh. 1853 | - | - | + | + | - |
| <i>Navicula</i> sp.10                                                                                            |                                                                                                                                                                                                                                                                                | - | - | - | + | - |
| <i>Navicula</i> sp.135/14                                                                                        |                                                                                                                                                                                                                                                                                | - | - | - | + | - |
| <i>Navicula</i> sp.136/23                                                                                        |                                                                                                                                                                                                                                                                                | - | - | - | + | - |
| <i>Navicula</i> sp.146/2                                                                                         |                                                                                                                                                                                                                                                                                | - | - | - | + | - |
| <i>Navicula</i> sp.1F                                                                                            |                                                                                                                                                                                                                                                                                | - | - | - | + | - |
| <i>Navicula</i> sp.2                                                                                             |                                                                                                                                                                                                                                                                                | - | - | - | + | + |
| <i>Navicula</i> sp.2F                                                                                            |                                                                                                                                                                                                                                                                                | - | - | - | + | - |
| <i>Navicula</i> sp.3                                                                                             |                                                                                                                                                                                                                                                                                | - | - | - | + | + |
| <i>Navicula</i> sp.3F                                                                                            |                                                                                                                                                                                                                                                                                | - | - | - | + | - |
| <i>Navicula</i> sp.4                                                                                             |                                                                                                                                                                                                                                                                                | - | - | - | + | + |
| <i>Navicula</i> sp.4F                                                                                            |                                                                                                                                                                                                                                                                                | - | - | - | + | - |
| <i>Navicula</i> sp.6                                                                                             |                                                                                                                                                                                                                                                                                | - | - | - | + | - |
| <i>Navicula</i> sp.7                                                                                             |                                                                                                                                                                                                                                                                                | - | - | - | + | - |
| <i>Navicula</i> sp.8                                                                                             |                                                                                                                                                                                                                                                                                | - | - | - | + | - |
| <i>Navicula</i> sp.9                                                                                             |                                                                                                                                                                                                                                                                                | - | - | - | + | - |
| <i>Navicula</i> sp.B1                                                                                            |                                                                                                                                                                                                                                                                                | - | - | - | + | - |
| <i>Navicula</i> sp.B2                                                                                            |                                                                                                                                                                                                                                                                                | - | - | - | + | - |
| <i>Navicula</i> sp.B3                                                                                            |                                                                                                                                                                                                                                                                                | - | - | - | + | - |
| <i>Navicula</i> sp.D1                                                                                            |                                                                                                                                                                                                                                                                                | - | - | - | + | - |
| <i>Navicula</i> sp.D2                                                                                            |                                                                                                                                                                                                                                                                                | - | - | - | + | - |
| <i>Navicula</i> sp.O1                                                                                            |                                                                                                                                                                                                                                                                                | - | - | - | + | - |
| <i>Navicula</i> sp.O2                                                                                            |                                                                                                                                                                                                                                                                                | - | - | - | + | - |
| <i>Navicula</i> sp.O3                                                                                            |                                                                                                                                                                                                                                                                                | - | - | - | + | - |
| <b><i>Geissleria</i> Lange-Bert. et Metzeltin 1996</b>                                                           |                                                                                                                                                                                                                                                                                |   |   |   |   |   |
| <i>Geissleria decussis</i> (Østrup) Lange-Bert. et Metzeltin                                                     | Bas.: <i>Navicula decussis</i>                                                                                                                                                                                                                                                 | - | + | - | - | - |

| 1                                                                      | 2                                                                                                                                                                                                         | 3 | 4 | 5 | 6 | 7 |
|------------------------------------------------------------------------|-----------------------------------------------------------------------------------------------------------------------------------------------------------------------------------------------------------|---|---|---|---|---|
| 1996                                                                   | Østrup 1910                                                                                                                                                                                               |   |   |   |   |   |
| <b>Trachyneis Cleve 1894</b>                                           |                                                                                                                                                                                                           |   |   |   |   |   |
| <i>Trachyneis aspera</i> (Ehrenb.) Cleve 1894                          | Bas.: <i>Navicula aspera</i> Ehrenb. 1840                                                                                                                                                                 | + | + | + | + | + |
| <i>Trachyneis aspera</i> var. <i>intermedia</i> (Grunow) Cleve 1894    | Bas.: <i>Navicula aspera</i> var. <i>intermedia</i> Grunow 1876; Syn.: <i>Trachyneis intermedium</i> (Grunow) J.W. Bailey 1924                                                                            | - | - | - | + | - |
| <i>Trachyneis aspera</i> var. <i>pulchella</i> (W. Sm.) Cleve 1894     | Bas.: <i>Stauroneis pulchella</i> W. Sm. 1853                                                                                                                                                             | + | - | - | + | + |
| <i>Trachyneis aspera</i> var. <i>vulgaris</i> Cleve 1894               | Syn.: <i>Navicula aspera</i> var. <i>vulgaris</i> (Cleve) Fricke 1902                                                                                                                                     | + | - | - | + | + |
| <i>Trachyneis clepsydra</i> (Donkin) Cleve 1894                        | Bas.: <i>Navicula clepsydra</i> Donkin 1861                                                                                                                                                               | - | + | - | - | - |
| <b>Seminavis D.G. Mann ex Round et al. 1990</b>                        |                                                                                                                                                                                                           |   |   |   |   |   |
| <i>Seminavis cymbelloides</i> (Grunow) D.G. Mann 1990*                 | Bas.: <i>Amphora cymbelloides</i> Grunow 1867; Syn.: <i>Cymbella cymbelloides</i> (Grunow) Gusl. 1992                                                                                                     | - | - | + | + | + |
| <i>Seminavis pusilla</i> (Grunow) E.J. Cox et G. Reid 2004             | Bas.: <i>Cymbella pusilla</i> Grunow ex A.W.F. Schmidt et al. 1875; Syn.: <i>Cocconema pusilla</i> (Grunow ex A.W.F. Schmidt et al.) W. et G.S. West 1911; <i>Navicella pusilla</i> (Grunow) Krammer 1997 | + | - | + | + | - |
| <i>Seminavis strigosa</i> (Hust.) D.G. Mann et A. Economou-Amilii 2003 | Bas.: <i>Amphora strigosa</i> Hust. 1949                                                                                                                                                                  | - | - | - | + | - |
| <i>Seminavis</i> sp.1                                                  |                                                                                                                                                                                                           | - | - | - | + | - |
| <i>Seminavis</i> sp.2                                                  |                                                                                                                                                                                                           | - | - | + | + | - |
| <i>Seminavis</i> sp.3                                                  |                                                                                                                                                                                                           | - | - | - | + | - |
| <b>Haslea Simonsen 1974</b>                                            |                                                                                                                                                                                                           |   |   |   |   |   |
| <i>Haslea crucigera</i> (W. Sm.) Simonsen 1974                         | Bas.: <i>Schizonema cruciger</i> W. Sm. 1856; Syn.: <i>Stauroneis crucigera</i> (W. Sm.) Heiberg 1863; <i>Dickieia crucigera</i> (W. Sm.) De Toni 1891; <i>Navicula crucigera</i> (W. Sm.) Cleve 1894     | - | - | + | + | + |
| <i>Haslea cf. howeana</i> (Hagelstein) Giffen 1980                     |                                                                                                                                                                                                           | - | - | - | + | - |
| <i>Haslea karadagensis</i> Davidovich, Gastineau et Mouget 2012        |                                                                                                                                                                                                           | - | - | - | + | - |
| <i>Haslea ostrearia</i> (Gaillon) Simonsen 1974                        | Bas.: <i>Vibrio ostrearius</i> Gaillon 1820; Syn.: <i>Navicula ostrearia</i> (Gaillon) Bory 1831                                                                                                          | - | - | - | + | + |
| <i>Haslea spicula</i> (Hickie) Lange-Bert. 1997                        | Bas.: <i>Stauroneis spicula</i> Cleve et Grunow 1880; Syn.: <i>Navicula spicula</i> (Cleve et Grunow) Cleve 1894; <i>Haslea spicula</i> (Hickie) Bukht. 1995                                              | - | - | + | + | - |

| 1                                                                                     | 2                                                                                                                                                                                                                                                   | 3 | 4 | 5 | 6 | 7 |
|---------------------------------------------------------------------------------------|-----------------------------------------------------------------------------------------------------------------------------------------------------------------------------------------------------------------------------------------------------|---|---|---|---|---|
| <i>Haslea subagnita</i> (Proschk.-Lavr.) I.V. Makarova et Karayeva 1985               | Bas.: <i>Navicula subagnita</i><br>Proschk.-Lavr. 1963                                                                                                                                                                                              | + | - | + | + | + |
| <i>Haslea</i> sp.G1                                                                   |                                                                                                                                                                                                                                                     | - | - | - | + | - |
| <b><i>Amicula</i> (Witkowski) Witkowski 2000 #</b>                                    |                                                                                                                                                                                                                                                     |   |   |   |   |   |
| <i>Amicula specululum</i> (Witkowski) Witkowski 2000*                                 | Bas.: <i>Navicula specululum</i><br>Witkowski 1994                                                                                                                                                                                                  | - | - | - | + | + |
| <i>Amicula</i> sp.1F                                                                  |                                                                                                                                                                                                                                                     | - | - | - | + | - |
| <b><i>Dickieia</i> Berkeley ex Kütz. 1844 emend D.G. Mann 1994</b>                    |                                                                                                                                                                                                                                                     |   |   |   |   |   |
| <i>Dickieia resistans</i> Witkowski, Lange-Bert. et Metzeltin 2000*                   |                                                                                                                                                                                                                                                     | - | - | - | + | - |
| <i>Dickieia subinflata</i> (Grunow ex Cleve et J.D. Möller) D.G. Mann 1994            | Bas.: <i>Navicula subinflata</i><br>Grunow 1882; Syn.: <i>Placoneis subinflata</i> (Grunow)<br>Mereschk. 1903                                                                                                                                       | - | - | + | + | - |
| <i>Dickieia</i> sp.1B                                                                 |                                                                                                                                                                                                                                                     | - | - | - | + | - |
| <i>Dickieia</i> sp.2PHYL                                                              |                                                                                                                                                                                                                                                     | - | - | + | - | - |
| <b><i>Eolimna</i> Lange-Bert. et W. Schiller 1997 #</b>                               |                                                                                                                                                                                                                                                     |   |   |   |   |   |
| <i>Eolimna</i> sp.1F                                                                  |                                                                                                                                                                                                                                                     | - | - | - | + | - |
| <i>Eolimna</i> sp.2O                                                                  |                                                                                                                                                                                                                                                     | - | - | - | + | - |
| <b><i>Fogedia</i> Witkowski, Lange-Bert. et Metzeltin 1997</b>                        |                                                                                                                                                                                                                                                     |   |   |   |   |   |
| <i>Fogedia finmarchica</i> (Cleve et Grunow) Witkowski, Metzeltin et Lange-Bert. 1997 | Bas.: <i>Stauroneis finmarchica</i><br>Cleve et Grunow 1880; Syn.:<br><i>Navicula finmarchica</i> (Cleve et Grunow) Cleve 1895                                                                                                                      | - | + | - | + | + |
| <i>Fogedia geisslerae</i> Witkowski, Metzeltin et Lange-Bert. 1997*                   |                                                                                                                                                                                                                                                     | - | - | - | + | - |
| <i>Fogedia giffeniana</i> (Foged) Witkowski, Lange-Bert., Metzeltin et Bafana 1997*   | Bas.: <i>Navicula giffeniana</i><br>Foged 1975                                                                                                                                                                                                      | - | - | - | + | - |
| <i>Fogedia heterovalvata</i> (Simonsen) Witkowski, Metzeltin et Lange-Bert. 2000*     | Bas.: <i>Navicula heterovalvata</i><br>Simonsen 1959                                                                                                                                                                                                | - | - | - | + | - |
| <i>Fogedia</i> sp.2                                                                   |                                                                                                                                                                                                                                                     | - | - | - | + | - |
| <b><i>Hippodonta</i> Lange-Bert., Witkowski et Metzeltin 1996</b>                     |                                                                                                                                                                                                                                                     |   |   |   |   |   |
| <i>Hippodonta capitata</i> (Ehrenb.) Lange-Bert., Metzeltin et Witkowski 1996         | Bas.: <i>Navicula capitata</i><br>Ehrenb. 1838; Syn.: <i>Navicula hungarica</i> var. <i>capitata</i> (Ehrenb.) Cleve 1895;<br><i>Navicula hungarica</i> f. <i>capitata</i> (Ehrenb.) Hust. 1957;<br><i>Navicula capitata</i> (Ehrenb.) R. Ross 1947 | - | + | + | - | - |
| <i>Hippodonta hungarica</i> (Grunow) Lange-Bert., Metzeltin et Witkowski 1996         | Bas.: <i>Navicula hungarica</i><br>Grunow 1860; Syn.: <i>Navicula viridula</i> var. <i>hungarica</i> (Grunow) H. Perag. et Perag. 1897; <i>Navicula capitata</i> var. <i>hungarica</i> (Grunow) R. Ross 1947                                        | - | - | + | + | + |
| <i>Hippodonta</i> sp.1                                                                |                                                                                                                                                                                                                                                     | - | - | - | + | - |
| <i>Hippodonta</i> sp.2                                                                |                                                                                                                                                                                                                                                     | - | - | - | + | - |
| <i>Hippodonta</i> sp.3                                                                |                                                                                                                                                                                                                                                     | - | - | - | + | - |

| 1                                                                                            | 2                                                     | 3 | 4 | 5 | 6 | 7 |
|----------------------------------------------------------------------------------------------|-------------------------------------------------------|---|---|---|---|---|
| <i>Hippodonta</i> sp.3F                                                                      |                                                       | - | - | - | + | - |
| <i>Hippodonta</i> sp.4                                                                       |                                                       | - | - | - | + | - |
| <i>Hippodonta</i> sp.4F                                                                      |                                                       | - | - | - | + | - |
| <i>Hippodonta</i> sp.5                                                                       |                                                       | - | - | - | + | - |
| <i>Hippodonta</i> sp.5F                                                                      |                                                       | - | - | - | + | - |
| <i>Hippodonta</i> sp.6                                                                       |                                                       | - | - | + | + | - |
| <i>Hippodonta</i> sp.7                                                                       |                                                       | - | - | - | + | - |
| <i>Hippodonta</i> sp.8                                                                       |                                                       | - | - | - | + | - |
| <i>Hippodonta</i> sp.9                                                                       |                                                       | - | - | - | + | - |
| <i>Hippodonta</i> sp.10                                                                      |                                                       | - | - | - | + | - |
| <i>Hippodonta</i> sp.10 A 032                                                                |                                                       | - | - | - | + | - |
| <i>Hippodonta</i> sp.Bel1                                                                    |                                                       | - | - | - | + | - |
| <i>Hippodonta</i> sp.D5                                                                      |                                                       | - | - | - | + | - |
| <i>Hippodonta</i> sp.O1                                                                      |                                                       | - | - | - | + | - |
| <i>Hippodonta</i> sp.PHYL10                                                                  |                                                       | - | - | + | - | - |
| <i>Hippodonta</i> sp.PHYL11                                                                  |                                                       | - | - | + | - | - |
| <i>Hippodonta</i> sp.PHYL12                                                                  |                                                       | - | - | + | - | - |
| <b><i>Cocconeioipsis</i> Witkowski, Lange-Bert. et Metzeltin 2000 #</b>                      |                                                       |   |   |   |   |   |
| <i>Cocconeioipsis breviata</i> (Hust.) Witkowski, Lange-Bert. et Metzeltin 2000*             | Bas.: <i>Navicula breviata</i> Hust. 1964             | - | - | - | + | - |
| <i>Cocconeioipsis fraudulenta</i> (A.W.F. Schmidt) Witkowski, Lange-Bert. et Metzeltin 2000* | Bas.: <i>Navicula fraudulenta</i> A.W.F. Schmidt 1881 | - | - | - | + | - |
| <i>Cocconeioipsis patrickae</i> (Hust.) Witkowski, Lange-Bert. et Metzeltin 2000*            | Bas.: <i>Navicula patrickae</i> Hust. 1955            | - | - | - | + | - |
| <i>Cocconeioipsis pullus</i> (Hust.) Witkowski, Lange-Bert. et Metzeltin 2000*               | Bas.: <i>Navicula pullus</i> Hust. 1955               | - | - | - | + | - |
| <i>Cocconeioipsis</i> sp.1                                                                   |                                                       | - | - | - | + | - |
| <i>Cocconeioipsis</i> sp.1F                                                                  |                                                       | - | - | - | + | - |
| <i>Cocconeioipsis</i> sp.2F                                                                  |                                                       | - | - | - | + | - |
| <i>Cocconeioipsis</i> sp.3F                                                                  |                                                       | - | - | - | + | - |
| <i>Cocconeioipsis</i> sp.4F                                                                  |                                                       | - | - | - | + | - |
| <b><i>Chamaepinnularia</i> Lange-Bert. et Krammer 1996 #</b>                                 |                                                       |   |   |   |   |   |
| <i>Chamaepinnularia alexandrowiczii</i> Witkowski, Lange-Bert. et Metzeltin 2000*            |                                                       | - | - | - | + | - |
| <i>Chamaepinnularia</i> cf. <i>alexandrowiczii</i> Witkowski, Lange-Bert. et Metzeltin 2000* |                                                       | - | - | - | + | - |
| <i>Chamaepinnularia clamans</i> (Hust.) Witkowski, Lange-Bert. et Metzeltin 2000*            | Bas.: <i>Navicula clamans</i> Hust. 1939              | - | - | - | + | - |
| <i>Chamaepinnularia margaritiana</i> (Witkowski) Witkowski 1996*                             | Bas.: <i>Navicula margaritiana</i> Witkowski 1994     | - | - | - | + | - |
| <i>Chamaepinnularia truncata</i> (König) Witkowski, Lange-Bert. et Metzeltin 2000*           | Bas.: <i>Navicula truncata</i> König 1959             | - | - | - | + | - |
| <i>Chamaepinnularia</i> sp.1                                                                 |                                                       | - | - | - | + | - |
| <i>Chamaepinnularia</i> sp.1F                                                                |                                                       | - | - | - | + | - |
| <i>Chamaepinnularia</i> sp.2                                                                 |                                                       | - | - | - | + | - |
| <i>Chamaepinnularia</i> sp.3                                                                 |                                                       | - | - | + | - | - |
| <b>Pleurosigmataceae Mereschk. 1903</b>                                                      |                                                       |   |   |   |   |   |
| <b><i>Pleurosigma</i> W. Sm. 1852</b>                                                        |                                                       |   |   |   |   |   |
| <i>Pleurosigma aestuarii</i> (Bréb. ex Kütz.) W. Sm. 1853                                    | Bas.: <i>Navicula aestuarii</i> Bréb.                 | + | - | + | + | - |

| 1                                                                          | 2                                                                                                                                                                                                                                                                               | 3 | 4 | 5 | 6 | 7 |
|----------------------------------------------------------------------------|---------------------------------------------------------------------------------------------------------------------------------------------------------------------------------------------------------------------------------------------------------------------------------|---|---|---|---|---|
|                                                                            | ex Kütz. 1849; Syn.:<br><i>Gyrosigma aestuarii</i> (Bréb. ex Kütz.) Griffith et Henfrey 1856; <i>Pleurosigma angulatum</i> var. <i>aestuarii</i> (Bréb. ex Kütz.) Van Heurck 1885                                                                                               |   |   |   |   |   |
| <i>Pleurosigma angulatum</i> (Queck.) W. Sm. 1852                          | Bas.: <i>Navicula angulata</i> Queck. 1848                                                                                                                                                                                                                                      | + | + | + | + | + |
| <i>Pleurosigma angulatum</i> var. <i>strigosa</i> (W. Sm.) Van Heurck 1885 | Bas.: <i>Pleurosigma strigosum</i> W. Sm. 1852; Syn.: <i>Gyrosigma strigosum</i> (W. Sm.) Griffith et Henfrey 1856                                                                                                                                                              | - | + | + | + | + |
| <i>Pleurosigma clevei</i> Grunow ex Cleve et Grunow 1880*                  | Syn.: <i>Pleurosigma delicatulum</i> var. <i>clevei</i> (Grunow) H. Perag. 1891                                                                                                                                                                                                 | - | - | - | + | - |
| <i>Pleurosigma cuspidatum</i> (Cleve) Cleve 1894                           | Bas.: <i>Pleurosigma lanceolatum</i> var. <i>cuspidatum</i> Cleve 1881; Syn.: <i>Pleurosigma cuspidatum</i> (Cleve) H. Perag. 1891                                                                                                                                              | - | + | + | + | + |
| <i>Pleurosigma cuspidatum</i> var. <i>rostratum</i> Proschk.-Lavr. 1963    |                                                                                                                                                                                                                                                                                 | + | + | + | - | - |
| <i>Pleurosigma elongatum</i> W. Sm. 1852                                   | Syn.: <i>Gyrosigma elongatum</i> (W. Sm.) Griffith et Henfrey 1856; <i>Pleurosigma angulatum</i> var. <i>elongatum</i> (W. Sm.) Van Heurck 1885; <i>Gyrosigma elongatum</i> (W. Sm.) G.S. West 1909                                                                             | + | + | + | + | + |
| <i>Pleurosigma formosum</i> W. Sm. 1852                                    | Syn.: <i>Gyrosigma formosum</i> (W. Sm.) Griffith et Henfrey 1856; <i>Scalprum formosum</i> (W. Sm.) Kuntze 1891                                                                                                                                                                | + | + | + | + | + |
| <i>Pleurosigma formosum</i> var. <i>dalmatica</i> (Grunow) Cleve 1894      | Bas.: <i>Pleurosigma decorum</i> var. <i>dalmatica</i> Grunow ex Cleve et J.D. Möller 1878; Syn.: <i>Pleurosigma dalmaticum</i> (Grunow) Grunow ex Rodríguez et Femenías 1889                                                                                                   | + | - | - | + | - |
| <i>Pleurosigma rigidum</i> W. Sm. 1853                                     | Syn.: <i>Gyrosigma rigidum</i> (W. Sm.) Griffith et Henfrey 1856; <i>Scalprum rigidum</i> (W. Sm.) Kuntze 1891                                                                                                                                                                  | + | + | + | + | + |
| <i>Pleurosigma salinarum</i> (Grunow) Grunow ex Cleve et Grunow 1880       | Bas.: <i>Pleurosigma delicatulum</i> var. <i>salinarum</i> Grunow 1878; Syn.: <i>Pleurosigma angulatum</i> f. <i>salinarum</i> (Grunow) De Toni 1891; <i>Pleurosigma pusillum</i> var. <i>salinarum</i> (Grunow) H. Perag. 1891; <i>Scalprum salinarum</i> (Grunow) Kuntze 1891 | + | - | + | - | - |

| 1                                                                                     | 2                                                                                                                                                                                                                                                                   | 3 | 4 | 5 | 6 | 7 |
|---------------------------------------------------------------------------------------|---------------------------------------------------------------------------------------------------------------------------------------------------------------------------------------------------------------------------------------------------------------------|---|---|---|---|---|
| <b>Toxonidea Donkin 1858</b>                                                          |                                                                                                                                                                                                                                                                     |   |   |   |   |   |
| <i>Toxonidea insignis</i> Donkin 1858***                                              |                                                                                                                                                                                                                                                                     | - | - | - | + | + |
| <b>Carinasigma G. Reid 2012</b>                                                       |                                                                                                                                                                                                                                                                     |   |   |   |   |   |
| <i>Carinasigma minuta</i> (Donkin) G. Reid 2012                                       | Bas.: <i>Pleurosigma minutum</i> Donkin 1858; Syn.: <i>Donkinia minuta</i> (Donkin) Ralfs ex A. Pritch. 1861 emend E.J. Cox 1983; <i>Donkinia recta</i> var. <i>minuta</i> (Donkin) Carruthers 1864; <i>Gyrosigma rectum</i> var. <i>minuta</i> (Donkin) Cleve 1894 | - | + | + | + | + |
| <i>Carinasigma rectum</i> (Donkin) G. Reid 2012                                       | Bas.: <i>Pleurosigma rectum</i> Donkin 1858; Syn.: <i>Donkinia recta</i> (Donkin) Carruthers 1864; <i>Donkinia recta</i> (Donkin) Grunow 1880; <i>Gyrosigma rectum</i> (Donkin) Cleve 1894                                                                          | + | - | + | + | + |
| <b>Gyrosigma Hassal 1845</b>                                                          |                                                                                                                                                                                                                                                                     |   |   |   |   |   |
| <i>Gyrosigma acuminatum</i> (Kütz.) Rabenh. 1853                                      | Bas.: <i>Frustulia acuminata</i> Kütz. 1833; Syn.: <i>Navicula acuminata</i> (Kütz.) Kütz. 1844; <i>Pleurosigma acuminatum</i> (Kütz.) Grunow 1860                                                                                                                  | - | + | + | + | - |
| <i>Gyrosigma arcuatum</i> (Donkin) Sterrenburg ex R. Jahn, Sterrenburg et Kusber 2005 | Bas.: <i>Pleurosigma arcuatum</i> Donkin 1858; Syn.: <i>Pleurosigma fasciolum</i> var. <i>arcuatum</i> (Donkin) H. Perag. 1891; <i>Scalprum arcuatum</i> (Donkin) Kuntze 1891; <i>Gyrosigma fasciola</i> var. <i>arcuata</i> (Donkin) Cleve 1894                    | + | - | + | + | - |
| <i>Gyrosigma attenuatum</i> (Kütz.) Cleve 1894                                        | Bas.: <i>Frustulia attenuata</i> Kütz. 1833; Syn.: <i>Navicula attenuata</i> (Kütz.) Kütz. 1844                                                                                                                                                                     | - | - | + | + | + |
| <i>Gyrosigma balticum</i> (Ehrenb.) Rabenh. 1853                                      | Bas.: <i>Navicula baltica</i> Ehrenb. 1835; Syn.: <i>Pleurosigma balticum</i> (Ehrenb.) W. Sm. 1852                                                                                                                                                                 | + | - | + | + | - |
| <i>Gyrosigma balticum</i> f. <i>maeoticum</i> (Pant.) Proschk.-Lavr. 1963             | Bas.: <i>Pleurosigma balticum</i> var. <i>maeoticum</i> Pant. 1902; Syn.: <i>Gyrosigma balticum</i> var. <i>maeoticum</i> (Pant.) Proschk.-Lavr. 1950                                                                                                               | - | - | + | + | - |
| <i>Gyrosigma eximium</i> (Thwaites) Boyer 1927 emend Giffen 1970                      | Bas.: <i>Schizonema eximium</i> Thwaites 1848; Syn.: <i>Pleurosigma eximium</i> (Thwaites) Grunow ex Cleve et Grunow 1880                                                                                                                                           | - | - | + | + | - |
| <i>Gyrosigma fasciola</i> (Ehrenb.) Griffith et Henfrey 1856                          | Bas.: <i>Ceratoneis fasciola</i> Ehrenb. 1839; Syn.: <i>Gyrosigma fasciola</i> (Ehrenb.)                                                                                                                                                                            | + | - | + | + | + |

| 1                                                                              | 2                                                                                                                                                                                                                                                                                                                                                                                             | 3 | 4 | 5 | 6 | 7 |
|--------------------------------------------------------------------------------|-----------------------------------------------------------------------------------------------------------------------------------------------------------------------------------------------------------------------------------------------------------------------------------------------------------------------------------------------------------------------------------------------|---|---|---|---|---|
|                                                                                | Cleve 1894                                                                                                                                                                                                                                                                                                                                                                                    |   |   |   |   |   |
| <i>Gyrosigma fasciola</i> var. <i>prolongatum</i> (W. Sm.) Proschk.-Lavr. 1950 | Bas.: <i>Pleurosigma prolongatum</i> W. Sm. 1852; <i>Gyrosigma prolongatum</i> (W. Sm.) Griffith et Henfrey 1856; <i>Pleurosigma fasciolum</i> var. <i>prolongatum</i> (W. Sm.) H. Perag. 1891; <i>Gyrosigma prolongatum</i> (W. Sm.) Cleve 1894                                                                                                                                              | + | + | + | + | - |
| <i>Gyrosigma spenceri</i> (W. Sm.) Griffith et Henfrey 1856                    | Bas.: <i>Pleurosigma spencerii</i> W. Sm. 1852                                                                                                                                                                                                                                                                                                                                                | + | - | + | + | - |
| <i>Gyrosigma strigilis</i> (W. Sm.) Griffith et Henfrey 1856                   | Bas.: <i>Pleurosigma strigilis</i> W. Sm. 1852; Syn.: <i>Gyrosigma strigilis</i> (W. Sm.) Cleve 1894                                                                                                                                                                                                                                                                                          | + | - | + | - | - |
| <i>Gyrosigma tenuissimum</i> (W. Sm.) Griffith et Henfrey 1856                 | Bas.: <i>Pleurosigma tenuissimum</i> W. Sm. 1853; Syn.: <i>Gyrosigma tenuissimum</i> (W. Sm.) Cleve 1894                                                                                                                                                                                                                                                                                      | - | + | + | + | - |
| <b><i>Arcuatasigma</i> G. Reid 2012</b>                                        |                                                                                                                                                                                                                                                                                                                                                                                               |   |   |   |   |   |
| <i>Arcuatasigma closterioides</i> (Grunow) G. Reid 2012                        | Bas.: <i>Pleurosigma prolongatum</i> var. <i>closterioides</i> Grunow 1884; Syn.: <i>Gyrosigma prolongatum</i> var. <i>closterioides</i> (Grunow) Cleve 1894; <i>Pleurosigma fasciola</i> var. <i>closterioides</i> (Grunow) H. Perag. et Perag. 1898; <i>Gyrosigma fasciola</i> var. <i>closterioides</i> (Grunow) Proschk.-Lavr. 1950; <i>Gyrosigma closterioides</i> (Grunow) G. Reid 2004 | - | - | - | + | - |
| <b><i>Rhoicosigma</i> Grunow 1867 #</b>                                        |                                                                                                                                                                                                                                                                                                                                                                                               |   |   |   |   |   |
| <i>Rhoicosigma compactum</i> (Grev.) Grunow 1867*                              | Bas.: <i>Pleurosigma compactum</i> Grev. 1857; Syn.: <i>Donkinia compacta</i> (Grev.) Ralfs ex A. Pritch. 1861; <i>Gyrosigma compactum</i> (Grev.) Cleve 1894; <i>Amphiprora ralfsii</i> Walker-Arnott 1858                                                                                                                                                                                   | - | - | - | + | - |
| <b>Plagiotropidaceae D.G. Mann 1990</b>                                        |                                                                                                                                                                                                                                                                                                                                                                                               |   |   |   |   |   |
| <b><i>Plagiotropis</i> Pfitzer 1871</b>                                        |                                                                                                                                                                                                                                                                                                                                                                                               |   |   |   |   |   |
| <i>Plagiotropis elegans</i> (W. Sm.) Grunow ex Van Heurck 1885                 | Bas.: <i>Amphiprora elegans</i> W. Sm. 1856; Syn.: <i>Tropidoneis elegans</i> (W. Sm.) Cleve 1894                                                                                                                                                                                                                                                                                             | - | - | + | + | - |
| <i>Plagiotropis lepidoptera</i> (W. Greg.) Kuntze 1898                         | Bas.: <i>Amphiprora lepidoptera</i> W. Greg. 1857; Syn.: <i>Tropidoneis lepidoptera</i> (W. Greg.) Cleve 1894; <i>Tropidoneis lepidoptera</i> var.                                                                                                                                                                                                                                            | + | + | + | + | + |

| 1                                                                | 2                                                                                                                                                                                                                                                                                                                                                                                                                                                                                  | 3 | 4 | 5 | 6 | 7 |
|------------------------------------------------------------------|------------------------------------------------------------------------------------------------------------------------------------------------------------------------------------------------------------------------------------------------------------------------------------------------------------------------------------------------------------------------------------------------------------------------------------------------------------------------------------|---|---|---|---|---|
|                                                                  | <i>intermedia</i> Kiss. 1932                                                                                                                                                                                                                                                                                                                                                                                                                                                       |   |   |   |   |   |
| <i>Plagiotropis pusilla</i> (W. Greg.) Kuntze 1898*              | Bas.: <i>Amphiprora pusilla</i> W. Greg. 1857; Syn.: <i>Amphiprora lepidoptera</i> var. <i>pusilla</i> (W. Greg.) Van Heurck 1885; <i>Tropidoneis pusilla</i> (W. Greg.) Cleve 1894                                                                                                                                                                                                                                                                                                | - | - | - | + | - |
| <i>Plagiotropis tayrecta</i> Paddock 1988*                       | Syn.: <i>Plagiotropis recta</i> (W. Greg.) Grunow ex Cleve et J.D. Möller 1882; <i>Tropidoneis recta</i> (W. Greg.) Cleve 1894; <i>Amphiprora recta</i> W. Greg. 1857                                                                                                                                                                                                                                                                                                              | - | - | - | + | - |
| <b>Stauroneidaceae D.G. Mann 1990</b>                            |                                                                                                                                                                                                                                                                                                                                                                                                                                                                                    |   |   |   |   |   |
| <b><i>Stauroneis</i> Ehrenb. 1843</b>                            |                                                                                                                                                                                                                                                                                                                                                                                                                                                                                    |   |   |   |   |   |
| <i>Stauroneis anceps</i> Ehrenb. 1843                            | Syn.: <i>Navicula anceps</i> (Ehrenb.) A. Mann 1907                                                                                                                                                                                                                                                                                                                                                                                                                                | + | + | + | - | - |
| <i>Stauroneis phoenicenteron</i> (Nitzsch) Ehrenb. 1843          | Bas.: <i>Bacillaria phoenicenteron</i> Nitzsch 1817; Syn.: <i>Navicula phoenicenteron</i> (Nitzsch) Ehrenb. 1836; <i>Cymbella phoenicenteron</i> (Nitzsch) C. Agardh 1830                                                                                                                                                                                                                                                                                                          | - | - | + | - | - |
| <i>Stauroneis salina</i> f. <i>maeotica</i> Proschk.-Lavr. 1963  |                                                                                                                                                                                                                                                                                                                                                                                                                                                                                    | - | - | + | + | - |
| <i>Stauroneis</i> sp.1V                                          |                                                                                                                                                                                                                                                                                                                                                                                                                                                                                    | - | - | - | + | - |
| <b><i>Craticula</i> Grunow 1867</b>                              |                                                                                                                                                                                                                                                                                                                                                                                                                                                                                    |   |   |   |   |   |
| <i>Craticula cuspidata</i> (Kütz.) D.G. Mann 1990                | Bas.: <i>Frustulia cuspidata</i> Kütz. 1833; Syn.: <i>Navicula cuspidata</i> (Kütz.) Kütz. 1844                                                                                                                                                                                                                                                                                                                                                                                    | - | - | + | + | - |
| <i>Craticula halophila</i> (Grunow ex Van Heurck) D.G. Mann 1990 | Bas.: <i>Navicula cuspidata</i> var. <i>halophila</i> Grunow ex Van Heurck 1885, Syn.: <i>Navicula halophila</i> (Grunow ex Van Heurck) Cleve 1894                                                                                                                                                                                                                                                                                                                                 | + | + | + | + | + |
| <b><i>Stauronella</i> Mereschk. 1901</b>                         |                                                                                                                                                                                                                                                                                                                                                                                                                                                                                    |   |   |   |   |   |
| <i>Stauronella indubitabilis</i> Lange-Bert. et Genkal 1999      | Syn.: <i>Amphiprora constricta</i> Ehrenb. 1843 auct. non Ehrenb.; <i>Stauroneis constricta</i> Ehrenb. 1843 auct. non Ehrenb.; <i>Amphiprora constricta</i> Ehrenb. sensu W. Sm. 1853, <i>Navicula simulans</i> Donkin 1873; <i>Stauronella constricta</i> (Ehrenb.) Mereschk. 1901; <i>Stauroneis constricta</i> sensu Hust.1959 partim; <i>Stauroneis simulans</i> (Donkin) R. Ross ex Hartley 1986; <i>Craspedostauros indubitabilis</i> (Lange-Bert. et Genkal) E.J. Cox 1999 | + | - | + | + | + |



| 1                                                                    | 2                                                                                                                                     | 3 | 4 | 5 | 6 | 7 |
|----------------------------------------------------------------------|---------------------------------------------------------------------------------------------------------------------------------------|---|---|---|---|---|
| <b>Proschkiniaceae D.G. Mann 1990</b>                                |                                                                                                                                       |   |   |   |   |   |
| <b><i>Proschkinia</i> Karayeva 1978</b>                              |                                                                                                                                       |   |   |   |   |   |
| <i>Proschkinia complanatoidea</i> (Hust.) Karayeva 1978              | Bas.: <i>Navicula complanatoidea</i> Hust. 1962                                                                                       | - | - | + | + | - |
| <i>Proschkinia complanatula</i> (Hust.) D.G. Mann 1990               | Bas.: <i>Navicula complanatula</i> Hust. 1962                                                                                         | - | - | + | - | - |
| <i>Proschkinia</i> sp.1                                              |                                                                                                                                       | - | - | - | + | - |
| <b>THALASSIOPHYSALES D.G. Mann 1990</b>                              |                                                                                                                                       |   |   |   |   |   |
| <b>Catenulaceae Mereschk. 1902</b>                                   |                                                                                                                                       |   |   |   |   |   |
| <b><i>Catenula</i> Mereschk. 1903</b>                                |                                                                                                                                       |   |   |   |   |   |
| <i>Catenula adhaerens</i> Mereschk. 1902                             | Syn.: <i>Amphora sabyii</i> Salah 1955                                                                                                | - | - | - | + | - |
| <i>Catenula</i> sp.                                                  |                                                                                                                                       | - | - | + | - | - |
| <b><i>Amphora</i> Ehrenb. 1844</b>                                   |                                                                                                                                       |   |   |   |   |   |
| <i>Amphora</i> cf. <i>abludens</i> Simonsen 1960*                    |                                                                                                                                       | - | - | - | + | - |
| <i>Amphora acuta</i> W. Greg. 1857                                   | Syn.: <i>Oxyamphora acuta</i> (W. Greg.) Perag. 1903                                                                                  | + | + | + | + | + |
| <i>Amphora acuta</i> var. <i>arcuata</i> (A.W.F. Schmidt) Cleve 1895 | Bas.: <i>Amphora arcuata</i> A.W.F. Schmidt 1875                                                                                      | - | - | + | - | - |
| <i>Amphora angularis</i> var. <i>delicatula</i> Proschk.-Lavr. 1963  |                                                                                                                                       | - | - | - | + | - |
| <i>Amphora angusta</i> var. <i>oblongella</i> (Grunow) Cleve 1895    | Bas.: <i>Amphora oblongella</i> Grunow 1878                                                                                           | + | - | - | - | - |
| <i>Amphora angusta</i> var. <i>ventricosa</i> (W. Greg.) Cleve 1895  | Bas.: <i>Amphora ventricosa</i> W. Greg. 1857                                                                                         | - | - | - | + | - |
| <i>Amphora arcus</i> W. Greg. 1855                                   | Syn.: <i>Amphora arcus</i> W. Greg. 1857; <i>Oxyamphora arcus</i> (W. Greg.) Perag. 1903; <i>Cymbella arcus</i> (W. Greg.) Gusl. 1992 | - | + | + | + | + |
| <i>Amphora arenaria</i> Donkin 1858                                  | Syn.: <i>Amphora arenaria</i> var. <i>typica</i> Cleve 1895; <i>Amphora arenaria</i> var. <i>typica</i> (Cleve) Cleve-Euler 1953      | + | - | - | - | - |
| <i>Amphora arenicola</i> Grunow ex Cleve 1895                        | Syn.: <i>Amphora marina</i> var. <i>arenicola</i> Grunow ex Cleve et J.D. Möller 1882                                                 | + | - | - | + | - |
| <i>Amphora aspera</i> P. Petit 1878                                  | Syn.: <i>Oxyamphora aspera</i> (P. Petit) Perag. 1903                                                                                 | - | - | + | + | + |
| <i>Amphora bigibba</i> Grunow ex A.W.F. Schmidt et al. 1875          | Syn.: <i>Amphora binodis</i> var. <i>bigibba</i> (Grunow ex A.W.F. Schmidt et al.) H. Perag. et Perag. 1899                           | + | - | + | + | + |
| <i>Amphora caroliniana</i> Giffen 1980                               | Bas.: <i>Amphora granulata</i> sensu Hust. 1955                                                                                       | + | + | + | + | + |
| <i>Amphora commutata</i> Grunow ex Van Heurck 1880                   |                                                                                                                                       | - | + | + | + | - |
| <i>Amphora copulata</i> (Kütz.) Schoeman et R.E.M. Archibald 1986*   | Bas.: <i>Frustulia copulata</i> Kütz. 1833; Syn.: <i>Amphora balatonis</i> Pant. 1902                                                 | - | - | - | + | - |
| <i>Amphora crassa</i> W. Greg. 1857                                  |                                                                                                                                       | + | + | + | + | + |
| <i>Amphora decussata</i> Grunow 1867*                                | Syn.: <i>Oxyamphora decussata</i>                                                                                                     | - | - | - | + | - |

| 1                                                                   | 2                                                                                                                                                                                                             | 3 | 4 | 5 | 6 | 7 |
|---------------------------------------------------------------------|---------------------------------------------------------------------------------------------------------------------------------------------------------------------------------------------------------------|---|---|---|---|---|
|                                                                     | (Grunow) Perag. 1903                                                                                                                                                                                          |   |   |   |   |   |
| <i>Amphora delicatissima</i> Krasske ex Hust. 1930                  |                                                                                                                                                                                                               | + | - | + | + | - |
| <i>Amphora dubia</i> W. Greg. 1857                                  |                                                                                                                                                                                                               | - | - | + | + | - |
| <i>Amphora eunotia</i> var. <i>holsatica</i> (Hust.) Tunni          |                                                                                                                                                                                                               | + | - | - | - | - |
| <i>Amphora exilissima</i> Giffen 1967*                              |                                                                                                                                                                                                               | - | - | - | + | - |
| <i>Amphora</i> cf. <i>exilissima</i> Giffen 1967                    |                                                                                                                                                                                                               | - | - | - | + | - |
| <i>Amphora exilitata</i> Giffen 1971*                               |                                                                                                                                                                                                               | - | - | - | + | - |
| <i>Amphora genkalii</i> Gusl. 1987                                  |                                                                                                                                                                                                               | - | - | + | - | - |
| <i>Amphora graeffeana</i> Hendey 1973                               | Syn.: <i>Amphora graeffii</i> Cleve 1895                                                                                                                                                                      | + | - | + | + | + |
| <i>Amphora</i> cf. <i>graeffeana</i> Hendey 1973                    |                                                                                                                                                                                                               | - | - | - | + | - |
| <i>Amphora helenensis</i> Giffen 1973*                              |                                                                                                                                                                                                               | - | - | + | + | - |
| <i>Amphora hyalina</i> Kütz. 1844                                   | Syn.: <i>Auricula hyalina</i> (Kütz.) Karsten 1899; <i>Oxyamphora hyalina</i> (Kütz.) Perag. 1903                                                                                                             | + | + | + | + | + |
| <i>Amphora</i> cf. <i>hyalina</i> Kütz. 1844                        |                                                                                                                                                                                                               | - | - | - | + | - |
| <i>Amphora hyalina</i> var. <i>delicatula</i> Proschk.-Lavr. 1963   |                                                                                                                                                                                                               | + | + | + | + | - |
| <i>Amphora hyalina</i> var. <i>inpalpabilis</i> Proschk.-Lavr. 1963 |                                                                                                                                                                                                               | + | - | + | - | + |
| <i>Amphora inconspicua</i> Proschk.-Lavr. 1963                      |                                                                                                                                                                                                               | - | - | - | + | + |
| <i>Amphora jostesorum</i> Witkowski, Metzeltin et Lange-Bert. 2000* |                                                                                                                                                                                                               | - | - | - | + | - |
| <i>Amphora karajevae</i> Gusl. 1987                                 |                                                                                                                                                                                                               | - | - | + | - | - |
| <i>Amphora laevis</i> W. Greg. 1857*                                | Non <i>Amphora laevis</i> Menegh. 1848                                                                                                                                                                        | - | + | + | + | + |
| <i>Amphora laevis</i> W. Greg. 1857*                                | Syn.: <i>Amphora laevis</i> var. <i>laevissima</i> (W. Greg.) Cleve 1895                                                                                                                                      | - | - | + | - | - |
| <i>Amphora libyca</i> Ehrenb. 1840                                  | Syn.: <i>Amphora ovalis</i> var. <i>libyca</i> (Ehrenb.) Cleve 1895                                                                                                                                           | + | - | + | + | - |
| <i>Amphora limbata</i> Cleve et Grove 1892*                         |                                                                                                                                                                                                               | - | - | + | - | - |
| <i>Amphora lineolata</i> Ehrenb. 1838                               | Bas.: <i>Navicula lineolata</i> Ehrenb. 1838; Syn.: <i>Amphora bullosa</i> var. <i>lineolata</i> (Ehrenb.) H.L. Smith 1876-1888; <i>Amphora lineolata</i> sensu Kütz. 1844; <i>Amphora tenera</i> W. Sm. 1853 | - | + | + | + | + |
| <i>Amphora lydiae</i> Gusl. 1987                                    |                                                                                                                                                                                                               | - | - | + | - | - |
| <i>Amphora macilenta</i> W. Greg. 1857                              |                                                                                                                                                                                                               | + | - | - | - | - |
| <i>Amphora macilenta</i> var. <i>maeotica</i> Proschk.-Lavr. 1963   |                                                                                                                                                                                                               | - | + | + | + | + |
| <i>Amphora makarovae</i> Gusl. 1987                                 |                                                                                                                                                                                                               | - | - | + | - | - |
| <i>Amphora marina</i> W. Sm. 1857                                   |                                                                                                                                                                                                               | - | - | + | + | + |
| <i>Amphora mexicana</i> A.W.F. Schmidt 1875                         |                                                                                                                                                                                                               | + | - | - | - | - |
| <i>Amphora mexicana</i> f. <i>minor</i> H. Perag. et Perag. 1898    |                                                                                                                                                                                                               | + | - | - | - | - |
| <i>Amphora obtusa</i> W. Greg. 1857                                 |                                                                                                                                                                                                               | - | - | + | + | + |
| <i>Amphora obtusa</i> f. <i>distinguenda</i> Proschk.-Lavr. 1963    |                                                                                                                                                                                                               | - | - | - | + | - |
| <i>Amphora ocellata</i> Donkin 1861                                 | Non <i>Amphora ocellata</i> Ehrenb. 1838                                                                                                                                                                      | - | - | + | + | + |
| <i>Amphora ostrearia</i> Bréb. ex Kütz. 1849                        | Syn.: <i>Oxyamphora ostrearia</i>                                                                                                                                                                             | + | + | + | + | + |

| 1                                                                    | 2                                                                                                                                                                                                                                                                                                                                                                                 | 3 | 4 | 5 | 6 | 7 |
|----------------------------------------------------------------------|-----------------------------------------------------------------------------------------------------------------------------------------------------------------------------------------------------------------------------------------------------------------------------------------------------------------------------------------------------------------------------------|---|---|---|---|---|
|                                                                      | (Bréb. ex Kütz.) Perag. 1903;<br><i>Tetramphora ostrearia</i> (Bréb.)<br>Mereschk. 1902                                                                                                                                                                                                                                                                                           |   |   |   |   |   |
| <i>Amphora ostrearia</i> var. <i>lineata</i> Cleve 1895              |                                                                                                                                                                                                                                                                                                                                                                                   | - | - | + | - | - |
| <i>Amphora ostrearia</i> var. <i>vitrea</i> (Cleve) Cleve 1895       | Bas.: <i>Amphora vitrea</i> Cleve<br>1868                                                                                                                                                                                                                                                                                                                                         | + | - | + | + | + |
| <i>Amphora ovalis</i> (Kütz.) Kütz. 1844                             | Bas.: <i>Frustulia ovalis</i> Kütz.<br>1833; Syn.: <i>Amphora amphora</i><br>(Ehrenb.) Pant. 1902;<br><i>Amphora ocellata</i> Ehrenb.<br>1838; <i>Navicula amphora</i><br>Ehrenb. 1832; <i>Clevamphora</i><br><i>ovalis</i> (Kütz.) Mereschk. 1906                                                                                                                                | + | + | + | + | + |
| <i>Amphora parvula</i> Proschk.-Lavr. 1963                           |                                                                                                                                                                                                                                                                                                                                                                                   | + | - | + | + | - |
| <i>Amphora pediculus</i> (Kütz.) Grunow 1875                         | Bas.: <i>Cymbella pediculus</i><br>Kütz. 1844; Syn.: <i>Amphora</i><br><i>ovalis</i> var. <i>pediculus</i> (Kütz.)<br>Van Heurck 1885; <i>Amphora</i><br><i>ovalis</i> var. <i>pediculus</i> (Kütz.)<br>Pero 1893; <i>Amphora perpusilla</i><br>sensu Van Heurck; <i>Cymbella</i><br><i>caespitosum</i> var. <i>pediculus</i><br>(Kütz.) Brun 1880                                | - | + | + | + | + |
| <i>Amphora pogrebnjakovii</i> Gusl. 1992                             |                                                                                                                                                                                                                                                                                                                                                                                   | - | - | + | - | - |
| <i>Amphora pontica</i> Gusl. 1992                                    |                                                                                                                                                                                                                                                                                                                                                                                   | - | - | + | - | - |
| <i>Amphora</i> cf. <i>praelata</i> Hendey 1973*                      |                                                                                                                                                                                                                                                                                                                                                                                   | - | - | - | + | - |
| <i>Amphora proschkiniana</i> Gusl. 1987                              |                                                                                                                                                                                                                                                                                                                                                                                   | - | - | + | - | - |
| <i>Amphora proteus</i> W. Greg. 1857                                 | Syn.: <i>Amphora affinis</i> var.<br><i>proteus</i> (W. Greg.) Tempère<br>et Perag. 1908; <i>Amphora</i><br><i>proteoides</i> Hust., <i>Amphora</i><br><i>proteoides</i> f. <i>varians</i> Proschk.-<br>Lavr. 1963; <i>Amphora proteus</i><br>var. <i>laevistrata</i> Cleve,<br><i>Nitzschia anomala</i> Proschk.-<br>Lavr. 1963, <i>Nitzschia curiosa</i><br>Proschk.-Lavr. 1963 | + | + | + | + | + |
| <i>Amphora proteus</i> var. <i>oculata</i> H. Perag. et Perag. 1898* |                                                                                                                                                                                                                                                                                                                                                                                   | - | - | + | + | - |
| <i>Amphora pusio</i> Cleve 1895*                                     |                                                                                                                                                                                                                                                                                                                                                                                   | - | - | - | + | - |
| <i>Amphora rhombica</i> Kitton 1876*                                 | Syn.: <i>Oxyamphora rhombica</i><br>(Kitton) Perag. 1903                                                                                                                                                                                                                                                                                                                          | - | - | - | + | - |
| <i>Amphora robusta</i> W. Greg. 1857                                 |                                                                                                                                                                                                                                                                                                                                                                                   | - | - | + | + | - |
| <i>Amphora spectabilis</i> W. Greg. 1857                             |                                                                                                                                                                                                                                                                                                                                                                                   | - | - | - | + | - |
| <i>Amphora staurophora</i> Jahlin-Dannfelt 1882                      | Non <i>Amphora staurophora</i><br>Castracane 1886; Syn:<br><i>Amphora dannfeltii</i> Berg 1952<br>illeg.                                                                                                                                                                                                                                                                          | - | - | - | + | - |
| <i>Amphora subacutiuscula</i> Schoemann 1972                         |                                                                                                                                                                                                                                                                                                                                                                                   | - | - | - | + | - |
| <i>Amphora sublaevis</i> Hust. 1955                                  |                                                                                                                                                                                                                                                                                                                                                                                   | - | - | + | + | - |
| <i>Amphora tenuissima</i> Hust. 1955                                 | Non <i>Amphora tenuissima</i>                                                                                                                                                                                                                                                                                                                                                     | - | - | + | - | - |

| 1                                                                  | 2                                                                                                                                                                                                     | 3 | 4 | 5 | 6 | 7 |
|--------------------------------------------------------------------|-------------------------------------------------------------------------------------------------------------------------------------------------------------------------------------------------------|---|---|---|---|---|
|                                                                    | Giffen 1967 illeg.                                                                                                                                                                                    |   |   |   |   |   |
| <i>Amphora terroris</i> Ehrenb. 1853                               |                                                                                                                                                                                                       | + | + | + | + | + |
| <i>Amphora topachevskii</i> Gusl. 1992                             |                                                                                                                                                                                                       | - | - | + | - | - |
| <i>Amphora truncata</i> (W. Greg.) Cleve 1895                      |                                                                                                                                                                                                       | - | + | + | + | - |
| <i>Amphora truncata</i> var. <i>brevis</i> Bodeanu 1976            |                                                                                                                                                                                                       | - | + | - | - | - |
| <i>Amphora venusta</i> Østrup 1910                                 |                                                                                                                                                                                                       | - | - | - | + | - |
| <i>Amphora wisei</i> (Salah) Simonsen 1962                         | Bas.: <i>Amphora turgida</i> var. <i>wisei</i> Salah 1955                                                                                                                                             | - | - | + | + | + |
| <i>Amphora</i> sp.1                                                |                                                                                                                                                                                                       | - | - | - | + | - |
| <i>Amphora</i> sp.168W                                             |                                                                                                                                                                                                       | - | - | - | + | - |
| <i>Amphora</i> sp.1F                                               |                                                                                                                                                                                                       | - | - | - | + | - |
| <i>Amphora</i> sp.2F                                               |                                                                                                                                                                                                       | - | - | - | + | - |
| <i>Amphora</i> sp.3F                                               |                                                                                                                                                                                                       | - | - | - | + | - |
| <i>Amphora</i> sp.5B                                               |                                                                                                                                                                                                       | - | - | - | + | - |
| <i>Amphora</i> sp.6                                                |                                                                                                                                                                                                       | - | - | - | + | - |
| <i>Amphora</i> sp.7K                                               |                                                                                                                                                                                                       | - | - | - | + | - |
| <i>Amphora</i> sp.8PH                                              |                                                                                                                                                                                                       | - | - | + | - | - |
| <i>Amphora</i> sp.O1                                               |                                                                                                                                                                                                       | - | - | - | + | - |
| <i>Amphora</i> sp.O2                                               |                                                                                                                                                                                                       | - | - | - | + | - |
| <i>Amphora</i> sp.S1                                               |                                                                                                                                                                                                       | - | - | - | + | - |
| <b><i>Halamphora</i> (Cleve) Levkov 2009</b>                       |                                                                                                                                                                                                       |   |   |   |   |   |
| <i>Halamphora acutiuscula</i> (Kütz.) Levkov 2009                  | Bas.: <i>Amphora acutiuscula</i> Kütz. 1844; Syn.: <i>Amphora coffeaeformis</i> var. <i>acutiuscula</i> (Kütz.) Hust. 1930; <i>Amphora coffeaeformis</i> var. <i>acutiuscula</i> (Kütz.) Rabenh. 1864 | - | + | + | + | + |
| <i>Halamphora angularis</i> (W. Greg.) Levkov 2009                 | Bas.: <i>Amphora angularis</i> W. Greg. 1855                                                                                                                                                          | - | - | + | + | + |
| <i>Halamphora</i> cf. <i>angularis</i> (W. Greg.) Levkov 2009      |                                                                                                                                                                                                       | - | - | - | + | - |
| <i>Halamphora exigua</i> (W. Greg.) Levkov 2009                    | Bas.: <i>Amphora exigua</i> W. Greg. 1857; Syn.: <i>Amphora coffeaeformis</i> var. <i>exigua</i> (W. Greg.) Rabenh. 1864; <i>Amphora coffeaeformis</i> var. <i>exigua</i> (W. Greg.) De Toni 1891     | + | + | + | + | + |
| <i>Halamphora coffeaeformis</i> (C. Agardh) Levkov 2009            | Bas.: <i>Frustulia coffeaeformis</i> C. Agardh 1827; Syn.: <i>Amphora coffeaeformis</i> (C. Agardh) Kütz. 1844                                                                                        | + | + | + | + | + |
| <i>Halamphora</i> cf. <i>coffeaeformis</i> (C. Agardh) Levkov 2009 |                                                                                                                                                                                                       | - | - | - | + | - |
| <i>Halamphora costata</i> (W. Sm.) Levkov 2009                     | Bas.: <i>Amphora costata</i> W. Sm. 1853                                                                                                                                                              | + | + | + | + | + |
| <i>Halamphora cuneata</i> (Cleve) Levkov 2009                      | Bas.: <i>Amphora cuneata</i> Cleve ex A.W.F. Schmidt et al. 1876                                                                                                                                      | - | - | + | + | + |
| <i>Halamphora</i> cf. <i>cuneata</i> (Cleve) Levkov 2009           |                                                                                                                                                                                                       |   |   |   | + |   |
| <i>Halamphora cymbifera</i> (W. Greg.) Levkov 2009*                | Bas.: <i>Amphora cymbifera</i> W. Greg. 1857                                                                                                                                                          | - | - | + | + | - |

| 1                                                                           | 2                                                                                                                                                                                                                                                                             | 3 | 4 | 5 | 6 | 7 |
|-----------------------------------------------------------------------------|-------------------------------------------------------------------------------------------------------------------------------------------------------------------------------------------------------------------------------------------------------------------------------|---|---|---|---|---|
| <i>Halamphora eunotia</i> (Cleve) Levkov 2009                               | Bas.: <i>Amphora eunotia</i> Cleve 1873                                                                                                                                                                                                                                       | + | + | + | + | + |
| <i>Halamphora holsatica</i> Levkov 2009                                     | Bas.: <i>Amphora holsatica</i> Hust. 1925                                                                                                                                                                                                                                     | - | - | + | - | - |
| <i>Halamphora subangularis</i> (Hust.) Levkov 2009                          | Bas.: <i>Amphora subangularis</i> Hust. 1955                                                                                                                                                                                                                                  | - | - | + | + | - |
| <i>Halamphora tenerrima</i> (Aleem et Hust.) Levkov 2009*                   | Bas.: <i>Amphora tenerrima</i> Aleem et Hust. 1951                                                                                                                                                                                                                            | - | - | - | + | - |
| <i>Halamphora turgida</i> (W. Greg.) Levkov 2009                            | Bas.: <i>Amphora turgida</i> W. Greg. 1857                                                                                                                                                                                                                                    | + | - | - | + | - |
| <i>Halamphora veneta</i> (Kütz.) Levkov 2009                                |                                                                                                                                                                                                                                                                               | - | + | + | - | - |
| <b>Undatella Paddock et P.A. Sims 1980</b>                                  |                                                                                                                                                                                                                                                                               |   |   |   |   |   |
| <i>Undatella quadrata</i> (Bréb. ex Kütz.) Paddock et P.A. Sims 1980        | Bas.: <i>Amphora quadrata</i> Bréb. ex Kütz. 1849; Syn.: <i>Amphora ostrearia</i> var. <i>quadrata</i> (Bréb. ex Kütz.) Rabenh. 1864; <i>Amphora ostrearia</i> var. <i>quadrata</i> (Bréb. ex Kütz.) Van Heurck 1885; <i>Oxyamphora quadrata</i> (Bréb. ex Kütz.) Perag. 1903 | - | - | - | + | - |
| <b>Lunella P.J.M. Snoeijs 1996 #</b>                                        |                                                                                                                                                                                                                                                                               |   |   |   |   |   |
| <i>Lunella ghalebii</i> Witkowski, Lange-Bert. et Metzeltin 2000*           |                                                                                                                                                                                                                                                                               | - | - | - | + | - |
| <b>BACILLARIALES Hendey 1937 emend. D.G. Mann</b>                           |                                                                                                                                                                                                                                                                               |   |   |   |   |   |
| <b>Bacillariaceae Ehrenb. 1831</b>                                          |                                                                                                                                                                                                                                                                               |   |   |   |   |   |
| <b>Bacillaria J.F. Gmel. 1791</b>                                           |                                                                                                                                                                                                                                                                               |   |   |   |   |   |
| <i>Bacillaria socialis</i> var. <i>baltica</i> Grunow ex De Toni 1892       | Bas.: <i>Nitzschia socialis</i> var. <i>baltica</i> Grunow ex Cleve et Grunow 1880                                                                                                                                                                                            | + | + | + | + | - |
| <i>Bacillaria paxillifera</i> (O. F. Müll.) Hendey 1951                     | Bas.: <i>Vibrio paxillifer</i> O.F. Müll. 1786; Syn.: <i>Nitzschia paxillifer</i> (O. F. Muller) Heiberg 1863; <i>Bacillaria paradoxa</i> J.F. Gmel. ex Linnaeus 1788                                                                                                         | + | + | + | + | + |
| <b>Hantzschia Grunow 1877</b>                                               |                                                                                                                                                                                                                                                                               |   |   |   |   |   |
| <i>Hantzschia amphioxys</i> (Ehrenb.) Grunow 1880                           | Bas.: <i>Eunotia amphioxys</i> Ehrenb. 1843; Syn.: <i>Nitzschia amphioxys</i> (Ehrenb.) W. Sm. 1853; <i>Homoeocladia amphioxys</i> (Ehrenb.) Kuntze 1898                                                                                                                      | + | + | + | + | + |
| <i>Hantzschia amphioxys</i> f. <i>capitata</i> O. Müll. 1909                |                                                                                                                                                                                                                                                                               | - | + | - | + | - |
| <i>Hantzschia crassa</i> Pant. 1902                                         | Syn.: <i>Nitzschia crassa</i> (Pant.) F.W. Mills 1934                                                                                                                                                                                                                         | - | - | + | + | - |
| <i>Hantzschia crassa</i> var. <i>obtusa</i> Wislouch et V.S. Poretzsky 1924 |                                                                                                                                                                                                                                                                               | - | - | + | + | - |
| <i>Hantzschia marina</i> (Donkin) Grunow ex Cleve et Grunow 1880*           | Bas.: <i>Epithemia marina</i> Donkin 1858                                                                                                                                                                                                                                     | - | - | - | + | - |
| <i>Hantzschia virgata</i> (Roper) Grunow ex Cleve et Grunow 1880*           | Bas.: <i>Nitzschia virgata</i> Roper 1858; Syn.: <i>Homoeocladia</i>                                                                                                                                                                                                          | - | - | - | + | - |

| 1                                                                                                               | 2                                                                                                                                                                                                                                                                                                     | 3 | 4 | 5 | 6 | 7 |
|-----------------------------------------------------------------------------------------------------------------|-------------------------------------------------------------------------------------------------------------------------------------------------------------------------------------------------------------------------------------------------------------------------------------------------------|---|---|---|---|---|
|                                                                                                                 | <i>virgata</i> (Roper) Kuntze 1898;<br><i>Pritchardia virgata</i> (Roper)<br>Rabenh. 1864                                                                                                                                                                                                             |   |   |   |   |   |
| <i>Hantzschia virgata</i> var. <i>capitellata</i> Hust. ex Schmidt et al. 1922                                  | Syn.: <i>Nitzschia virgata</i> var. <i>capitellata</i> (Hust.) Freng. 1925                                                                                                                                                                                                                            | - | - | + | + | - |
| <i>Hantzschia gracilis</i> (Roper) Lange-Bert. et Metzeltin ex Metzeltin, Lange-Bert. et García-Rodríguez 2005* | Bas.: <i>Hantzschia virgata</i> var. <i>gracilis</i> Hust. 1930                                                                                                                                                                                                                                       | - | - | - | + | - |
| <i>Hantzschia vivax</i> (W. Sm.) Perag. 1908                                                                    | Bas.: <i>Nitzschia vivax</i> W. Sm. 1853; Syn.: <i>Nitzschia amphioxys</i> var. <i>vivax</i> (W. Sm.) Grunow 1862;<br><i>Hantzschia vivax</i> (W. Sm.) Grunow 1877                                                                                                                                    | - | - | - | + | - |
| <i>Hantzschia elegantula</i> (Østrup) Witkowski, Lange-Bert. et Metzeltin 2000*                                 | Bas.: <i>Hantzschia amphioxys</i> var. <i>elegantula</i> Østrup 1910                                                                                                                                                                                                                                  |   |   |   | + |   |
| <i>Hantzschia</i> sp.O1                                                                                         |                                                                                                                                                                                                                                                                                                       | - | - | - | + | - |
| <i>Hantzschia</i> sp.177-1                                                                                      |                                                                                                                                                                                                                                                                                                       | - | - | - | + | - |
| <b>Psammodyctyon D.G. Mann 1990</b>                                                                             |                                                                                                                                                                                                                                                                                                       |   |   |   |   |   |
| <i>Psammodyctyon panduriforme</i> (W. Greg.) D.G. Mann 1990                                                     | Bas.: <i>Nitzschia panduriformis</i> (W. Greg.) 1857; Syn.: <i>Nitzschia latestriata</i> var. <i>panduriformis</i> (W. Greg.) Rabenh. 1864; <i>Nitzschia panduriformis</i> var. <i>minor</i> Grunow ex Cleve et Grunow 1880; <i>Tryblionella panduriformis</i> var. <i>minor</i> (Grunow) Freng. 1941 | + | + | + | + | + |
| <i>Psammodyctyon panduriforme</i> var. <i>continua</i> (Grunow) P.J.M. Snoeijjs 1998*                           | Bas.: <i>Nitzschia panduriformis</i> var. <i>continua</i> Grunow 1880                                                                                                                                                                                                                                 | - | - | + | + | + |
| <i>Psammodyctyon panduriforme</i> var. <i>delicatum</i> (Grunow) Poulin 1990                                    | Bas.: <i>Nitzschia panduriformis</i> var. <i>delicatula</i> Grunow 1880                                                                                                                                                                                                                               | + | + | + | + | - |
| <i>Psammodyctyon roridum</i> (Giffen) D.G. Mann 1990*                                                           | Bas.: <i>Nitzschia rorida</i> Giffen 1975                                                                                                                                                                                                                                                             | - | - | + | + | - |
| <i>Psammodyctyon rudum</i> (Cholnoky) D.G. Mann 1990*                                                           | Bas.: <i>Nitzschia ruda</i> Cholnoky 1968                                                                                                                                                                                                                                                             | - | - | - | + | - |
| <b><i>Cylindrotheca</i> Rabenh. 1859</b>                                                                        |                                                                                                                                                                                                                                                                                                       |   |   |   |   |   |
| <i>Cylindrotheca closterium</i> (Ehrenb.) Reimann et Lewin 1964                                                 | Bas.: <i>Ceratoneis closterium</i> Ehrenb. 1839; Syn.: <i>Nitzschia closterium</i> (Ehrenb.) W. Sm. 1853; <i>Nitzschiella tenuirostris</i> Mereschk. 1902                                                                                                                                             | + | + | + | + | + |
| <b><i>Nitzschia</i> Hassall 1845</b>                                                                            |                                                                                                                                                                                                                                                                                                       |   |   |   |   |   |
| <i>Nitzschia acicularis</i> (Kütz.) W. Sm. 1853 emend Schoeman 1970                                             | Bas.: <i>Synedra acicularis</i> Kütz. 1844; Syn.: <i>Ceratoneis acicularis</i> (Kütz.) Ralfs ex A. Pritch. 1861; <i>Nitzschiella acicularis</i> (Kütz.) Rabenh. 1864                                                                                                                                  | + | + | + | - | - |
| <i>Nitzschia acuminata</i> (W. Sm.) Grunow 1878                                                                 | Bas.: <i>Tryblionella acuminata</i> W. Sm. 1853; Syn.:                                                                                                                                                                                                                                                | + | + | + | + | + |

| 1                                                                                 | 2                                                                                                                                                                                                                            | 3 | 4 | 5 | 6 | 7 |
|-----------------------------------------------------------------------------------|------------------------------------------------------------------------------------------------------------------------------------------------------------------------------------------------------------------------------|---|---|---|---|---|
|                                                                                   | <i>Homoeocladia acuminata</i> (W. Sm.) Kuntze 1898                                                                                                                                                                           |   |   |   |   |   |
| <i>Nitzschia acuta</i> Cleve 1878                                                 | Syn.: <i>Tryblionella acuta</i> (Cleve) D.G. Mann ex Round et al. 1990                                                                                                                                                       | - | + | - | - | - |
| <i>Nitzschia aequorea</i> Hust. 1939*                                             |                                                                                                                                                                                                                              | - | - | + | + | + |
| <i>Nitzschia agnita</i> Hust. 1957*                                               |                                                                                                                                                                                                                              | - | - | - | + | - |
| <i>Nitzschia amphibia</i> Grunow 1862                                             | Syn.: <i>Bacillaria amphibia</i> (Grunow) Elmore ex Barbour 1895; <i>Nitzschia amphibia</i> var. <i>acutiuscula</i> Grunow 1862                                                                                              | + | + | + | + | + |
| <i>Nitzschia angularis</i> var. <i>affinis</i> (Grunow) Grunow ex Van Heurck 1881 | Bas.: <i>Nitzschia affinis</i> Grunow 1862                                                                                                                                                                                   | - | - | + | + | + |
| <i>Nitzschia aurariae</i> Cholnoky 1965*                                          |                                                                                                                                                                                                                              | - | - | - | + | - |
| <i>Nitzschia brevissima</i> Grunow ex Van Heurck 1881                             | Syn.: <i>Nitzschia parvula</i> Lewis ex Hust. ex A.W.F. Schmidt et al. 1921; <i>Nitzschia obtusa</i> var. <i>brevissima</i> (Grunow) Van Heurck 1885                                                                         | + | - | + | - | - |
| <i>Nitzschia capitellata</i> Hust. 1922                                           |                                                                                                                                                                                                                              | - | - | + | + | - |
| <i>Nitzschia</i> cf. <i>capitellata</i> Hust. 1922                                |                                                                                                                                                                                                                              | - | - | - | + | - |
| <i>Nitzschia circumsuta</i> (J.W. Bailey) Grunow 1878                             | Bas.: <i>Surirella circumsuta</i> J.W. Bailey 1851; Syn.: <i>Tryblionella circumsuta</i> (J.W. Bailey) Ralfs ex A. Pritch. 1861                                                                                              | - | + | + | + | + |
| <i>Nitzschia coarctata</i> Grunow 1880                                            | Syn.: <i>Nitzschia punctata</i> f. <i>coarctata</i> (Grunow) Hust. 1957, <i>Tryblionella coarctata</i> (Grunow) D.G. Mann ex Round et al. 1990                                                                               | + | + | + | + | + |
| <i>Nitzschia</i> cf. <i>coarctata</i> Grunow 1880                                 |                                                                                                                                                                                                                              | - | - | - | + | - |
| <i>Nitzschia communis</i> Rabenh. 1860                                            |                                                                                                                                                                                                                              | - | + | + | + | - |
| <i>Nitzschia commutata</i> Grunow 1880                                            |                                                                                                                                                                                                                              | - | + | + | - | - |
| <i>Nitzschia compressa</i> (J.W. Bailey) Boyer 1916                               | Bas.: <i>Pyxidicula compressa</i> J.W. Bailey 1851; Syn.: <i>Tryblionella punctata</i> W. Sm. 1853, <i>Nitzschia punctata</i> (W. Sm.) Grunow 1878, <i>Tryblionella compressa</i> (J.W. Bailey) Poulin ex Poulin et al. 1990 | + | + | + | + | + |
| <i>Nitzschia compressa</i> var. <i>elongata</i> (Grunow) Lange-Bert. 1988         | Syn.: <i>Tryblionella punctata</i> var. <i>elongata</i> Grunow 1862, <i>Nitzschia punctata</i> var. <i>elongata</i> (Grunow) Grunow ex Cleve et J.D. Möller 1878                                                             | + | + | + | + | - |
| <i>Nitzschia constricta</i> (Kütz.) Ralfs ex Pritchard 1861                       | Bas.: <i>Synedra constricta</i> Kütz. 1844; Syn.: <i>Nitzschia apiculata</i> (W. Greg.) Grunow 1878;                                                                                                                         | + | + | + | + | + |

| 1                                                                                 | 2                                                                                                                                                                                                                                       | 3 | 4 | 5 | 6 | 7 |
|-----------------------------------------------------------------------------------|-----------------------------------------------------------------------------------------------------------------------------------------------------------------------------------------------------------------------------------------|---|---|---|---|---|
|                                                                                   | <i>Tryblionella apiculata</i><br>Grunow 1880; <i>Tryblionella constricta</i> (Kütz.) Poulin ex Poulin, Berard-Therriault, Cardinal et Hamilton 1990                                                                                     |   |   |   |   |   |
| <i>Nitzschia constricta</i> var. <i>subconstricta</i> Grunow 1880                 | Syn.: <i>Tryblionella constricta</i> var. <i>subconstricta</i> (Grunow) H. Perag. 1889                                                                                                                                                  | - | + | + | + | + |
| <i>Nitzschia debilis</i> (Arnott ex O'Meara) Grunow ex Cleve et Grunow 1880       | Bas.: <i>Tryblionella debilis</i> Arnott 1873; Syn.: <i>Nitzschia tryblionella</i> var. <i>debilis</i> (Arnott) Hust. 1913                                                                                                              | - | + | + | + | - |
| <i>Nitzschia dissipata</i> (Kütz.) Grunow 1862                                    | Bas.: <i>Synedra dissipata</i> Kütz. 1844; Syn.: <i>Nitzschia palea</i> f. <i>dissipata</i> (Kütz.) Rabenh. 1864; <i>Nitzschia palea</i> var. <i>dissipata</i> (Kütz.) Schonfeldt 1907; <i>Nitzschia dissipata</i> (Kütz.) Rabenh. 1860 | + | + | + | + | + |
| <i>Nitzschia distans</i> W. Greg. 1857                                            |                                                                                                                                                                                                                                         | + | + | + | + | - |
| <i>Nitzschia dubia</i> W. Sm. 1853                                                |                                                                                                                                                                                                                                         | + | - | + | + | - |
| <i>Nitzschia fonticola</i> Grunow ex Cleve et J.D. Möller 1879                    | Bas.: <i>Nitzschia palea</i> var. <i>fonticola</i> Grunow 1880; Syn.: <i>Nitzschia fonticola</i> Grunow ex Cleve et J.D. Möller 1879                                                                                                    | - | - | - | + | - |
| <i>Nitzschia frequens</i> Hust. 1957*                                             |                                                                                                                                                                                                                                         | - | - | - | + | - |
| <i>Nitzschia frustulum</i> (Kütz.) Grunow ex Cleve et Grunow 1880                 | Bas.: <i>Synedra frustulum</i> Kütz. 1844                                                                                                                                                                                               | + | - | + | + | + |
| <i>Nitzschia gracilis</i> Hantzsch 1860                                           | Syn.: <i>Homoeocladia gracilis</i> (Hantzsch) Kuntze 1898                                                                                                                                                                               | - | - | - | + | + |
| <i>Nitzschia granulata</i> Grunow 1880                                            | Syn.: <i>Tryblionella granulata</i> (Grunow) D.G. Mann ex Round et al. 1990                                                                                                                                                             | + | + | + | + | + |
| <i>Nitzschia grossestriata</i> Hust. 1955*                                        |                                                                                                                                                                                                                                         | - | - | - | + | - |
| <i>Nitzschia hungarica</i> Grunow 1862                                            | Syn.: <i>Tryblionella hungarica</i> (Grunow) Freng. 1942; <i>Nitzschia plicatula</i> Hust. 1953; <i>Nitzschia rudsa</i> Hust. 1936; <i>Tryblionella hungarica</i> (Grunow) D.G. Mann ex Round et al. 1990                               | + | + | + | + | - |
| <i>Nitzschia hungarica</i> var. <i>pantocsekii</i> Wislouch et V.S. Poretzky 1924 | Syn.: <i>Tryblionella hungarica</i> var. <i>pantocsekii</i> (Wislouch et V.S. Poretzky) Bukht. 1995                                                                                                                                     | - | + | - | - | - |
| <i>Nitzschia hybrida</i> Grunow ex Cleve et Grunow 1880                           |                                                                                                                                                                                                                                         | + | + | + | + | + |
| <i>Nitzschia hybrida</i> f. <i>hyalina</i> Proschk.-Lavr. 1963                    |                                                                                                                                                                                                                                         | + | + | + | + | + |
| <i>Nitzschia inconspicua</i> Grunow 1862                                          | Syn.: <i>Nitzschia frustulum</i> var. <i>inconspicua</i> Grunow 1882                                                                                                                                                                    | - | - | - | + | - |
| <i>Nitzschia insignis</i> W. Greg. 1857                                           |                                                                                                                                                                                                                                         | - | - | - | + | + |
| <i>Nitzschia insignis</i> var. <i>sphatulifera</i> Grunow 1889                    |                                                                                                                                                                                                                                         | - | - | - | + | - |



| 1                                                                                                         | 2                                                                                                                                                                                                                                                                                                                                    | 3 | 4 | 5 | 6 | 7 |
|-----------------------------------------------------------------------------------------------------------|--------------------------------------------------------------------------------------------------------------------------------------------------------------------------------------------------------------------------------------------------------------------------------------------------------------------------------------|---|---|---|---|---|
| <i>Nitzschia laevissima</i> Grunow 1883                                                                   |                                                                                                                                                                                                                                                                                                                                      | - | - | - | + | - |
| <i>Nitzschia lanceolata</i> W. Sm. 1853                                                                   |                                                                                                                                                                                                                                                                                                                                      | + | + | + | + | + |
| <i>Nitzschia lanceolata</i> var. <i>minima</i> H. Perag. et Perag. 1900                                   | Bas.: <i>Nitzschia lanceolata</i> var. <i>lanceolata</i> f. <i>minima</i> Grunow ex Van Heurck 1881                                                                                                                                                                                                                                  | - | + | - | + | - |
| <i>Nitzschia lanceolata</i> var. <i>minor</i> (Grunow ex Van Heurck) H. Perag. et Perag. 1900             | Bas.: <i>Nitzschia lanceolata</i> var. <i>lanceolata</i> f. <i>minor</i> Grunow ex Van Heurck 1881                                                                                                                                                                                                                                   | + | + | + | + | + |
| <i>Nitzschia lanceolata</i> var. <i>pygmaea</i> Cleve 1883                                                |                                                                                                                                                                                                                                                                                                                                      | - | - | - | + | - |
| <i>Nitzschia levidensis</i> (W. Sm.) Grunow 1881                                                          | Bas.: <i>Tryblionella levidensis</i> W. Sm. 1856; Syn.: <i>Nitzschia tryblionella</i> var. <i>levidensis</i> (W. Sm.) Grunow ex Cleve et Grunow 1880                                                                                                                                                                                 | - | + | + | + | - |
| <i>Nitzschia levidensis</i> var. <i>victoriae</i> (Grunow) Cholnoky 1956                                  | Bas.: <i>Tryblionella victoriae</i> Grunow 1862; Syn.: <i>Nitzschia spectabilis</i> var. <i>victoriae</i> (Grunow) Lak 1954; <i>Nitzschia victoriae</i> (Grunow) Cleve 1898; <i>Tryblionella hantzschiana</i> var. <i>victoriae</i> (Grunow) Playfair 1914; <i>Nitzschia tryblionella</i> var. <i>victoriae</i> (Grunow) Grunow 1880 | - | + | + | - | - |
| <i>Nitzschia liebethuthii</i> Rabenh. 1864                                                                | Syn.: <i>Nitzschia perpusilla</i> Grunow 1862; non <i>Nitzschia perpusilla</i> Rabenh. 1861                                                                                                                                                                                                                                          | - | - | - | + | - |
| <i>Nitzschia</i> cf. <i>liebethuthii</i> Rabenh. 1864                                                     |                                                                                                                                                                                                                                                                                                                                      | - | - | - | + | - |
| <i>Nitzschia linearis</i> (C. Agardh) W. Sm. 1853                                                         | Bas.: <i>Frustulia linearis</i> C. Agardh; non <i>F. linearis</i> Kiss. 1931                                                                                                                                                                                                                                                         | + | + | + | + | + |
| <i>Nitzschia littoralis</i> Grunow 1880*                                                                  | Syn.: <i>Nitzschia tryblionella</i> var. <i>littoralis</i> (Grunow) Grunow ex Van Heurck 1881; <i>Tryblionella tryblionella</i> var. <i>littoralis</i> (Grunow) Prochazka 1923; <i>Tryblionella littoralis</i> (Grunow) D.G. Mann ex Round et al. 1990                                                                               | - | - | - | + | - |
| <i>Nitzschia longissima</i> (Bréb. ex Kütz.) Grunow 1862<br>emend Shorenko, Davidovich et Davidovich 2013 | Bas.: <i>Ceratoneis longissima</i> Bréb. ex Kütz. 1849; Syn.: <i>Nitzschia birostrata</i> W. Sm. 1853; <i>Nitzschia reversa</i> W. Sm. 1853                                                                                                                                                                                          | + | + | + | + | + |
| <i>Nitzschia lorenziana</i> var. <i>subtilis</i> Grunow ex Cleve et Grunow 1880                           | Syn.: <i>Nitzschia incurva</i> var. <i>subtilis</i> (Grunow ex Cleve et Grunow) R. Ross ex Hartley 1986                                                                                                                                                                                                                              | - | + | + | + | + |
| <i>Nitzschia marginulata</i> Grunow 1880                                                                  | Syn.: <i>Tryblionella marginulata</i> (Grunow) D.G. Mann ex                                                                                                                                                                                                                                                                          | - | - | + | + | - |

| 1                                                                                       | 2                                                                                                                                                                                                                                  | 3 | 4 | 5 | 6 | 7 |
|-----------------------------------------------------------------------------------------|------------------------------------------------------------------------------------------------------------------------------------------------------------------------------------------------------------------------------------|---|---|---|---|---|
|                                                                                         | Round et al. 1990                                                                                                                                                                                                                  |   |   |   |   |   |
| <i>Nitzschia microcephala</i> Grunow 1880                                               |                                                                                                                                                                                                                                    | - | - | + | + | - |
| <i>Nitzschia miserabilis</i> Cholnoky 1963*                                             |                                                                                                                                                                                                                                    | - | - | - | + | - |
| <i>Nitzschia navicularis</i> (Bréb.) Grunow 1880                                        | Bas.: <i>Surirella navicularis</i><br>Bréb. ex Kütz. 1849; Syn.:<br><i>Tryblionella navicularis</i> (Bréb.<br>ex Kütz.) Ralfs ex A. Pritch.<br>1861                                                                                | - | - | + | + | + |
| <i>Nitzschia obtusa</i> W. Sm. 1853                                                     |                                                                                                                                                                                                                                    | + | + | + | + | - |
| <i>Nitzschia ovalis</i> Arnott ex Cleve et Grunow 1880                                  |                                                                                                                                                                                                                                    | - | - | + | + | - |
| <i>Nitzschia palea</i> (Kütz.) W. Sm. 1856                                              | Bas.: <i>Synedra palea</i> Kütz.<br>1844                                                                                                                                                                                           | - | + | + | - | - |
| <i>Nitzschia palea</i> f. <i>astriata</i> Bodeanu 1976                                  |                                                                                                                                                                                                                                    | - | + | - | - | - |
| <i>Nitzschia palea</i> var. <i>capitata</i> Wislouch et V.S. Poretzky<br>1924           |                                                                                                                                                                                                                                    | - | + | + | + | - |
| <i>Nitzschia paleacea</i> Grunow 1881                                                   |                                                                                                                                                                                                                                    | - | + | - | - | - |
| <i>Nitzschia pellucida</i> Grunow 1880                                                  |                                                                                                                                                                                                                                    | - | - | - | + | - |
| <i>Nitzschia perindistincta</i> Cholnoky 1960*                                          |                                                                                                                                                                                                                                    | - | - | - | + | - |
| <i>Nitzschia persuadens</i> Cholnoky 1961*                                              |                                                                                                                                                                                                                                    | - | - | - | + | - |
| <i>Nitzschia plana</i> W. Sm. 1853                                                      | Syn.: <i>Tryblionella plana</i> (W.<br>Sm.) Pelletan 1889                                                                                                                                                                          | + | - | - | - | - |
| <i>Nitzschia punctata</i> var. <i>aralensis</i> Borscow 1877                            |                                                                                                                                                                                                                                    | + | - | - | - | - |
| <i>Nitzschia punctata</i> var. <i>minutissima</i> V.S. Poretzsky 1940                   |                                                                                                                                                                                                                                    | - | - | + | + | + |
| <i>Nitzschia pusilla</i> (Kütz.) Grunow emend Lange-Bert.<br>1976                       | Bas.: <i>Synedra pusilla</i> Kütz.<br>1844; Syn.: <i>Nitzschia</i><br><i>kuetzingiana</i> Hilse 1860;<br><i>Nitzschia palea</i> var.<br><i>kuetzingiana</i> (Hilse) Grunow<br>ex Van Heurck 1881                                   | + | + | + | + | + |
| <i>Nitzschia rectilonga</i> Takano 1983                                                 |                                                                                                                                                                                                                                    |   |   |   | + |   |
| <i>Nitzschia rupestris</i> Proschk.-Lavr. 1963                                          |                                                                                                                                                                                                                                    | + | + | + | + | - |
| <i>Nitzschia scalpelliformis</i> Grunow ex Cleve et Grunow<br>1880                      | Syn.: <i>Nitzschia obtusa</i> var.<br><i>scalpelliformis</i> (Grunow)<br>Grunow ex Van Heurck<br>1881                                                                                                                              | - | - | + | + | - |
| <i>Nitzschia sigma</i> (Kütz.) W. Sm. 1853                                              | Bas.: <i>Synedra sigma</i> Kütz.<br>1844                                                                                                                                                                                           | + | + | + | + | + |
| <i>Nitzschia sigma</i> var. <i>intercedens</i> Grunow 1878                              |                                                                                                                                                                                                                                    | - | - | + | + | + |
| <i>Nitzschia sigmatoformis</i> Hust. 1955                                               |                                                                                                                                                                                                                                    | - | - | + | + | - |
| <i>Nitzschia sigmatoformis</i> var. <i>subrecta</i> Proschk.-Lavr.                      |                                                                                                                                                                                                                                    | - | - | - | + | + |
| <i>Nitzschia sigmoidea</i> (Nitzsch) W. Sm. 1853                                        | Bas.: <i>Bacillaria sigmoidea</i><br>Nitzsch 1817; Syn.: <i>Frustulia</i><br><i>sigmoidea</i> (Nitzsch) Jenner<br>1845; <i>Cymbella sigmoidea</i><br>(Nitzsch) C. Agardh 1830;<br><i>Synedra sigmoidea</i> (Nitzsch)<br>Kütz. 1844 | - | + | + | + | - |
| <i>Nitzschia spathulata</i> Bréb. ex W. Sm. 1853                                        |                                                                                                                                                                                                                                    | - | + | - | + | - |
| <i>Nitzschia spathulata</i> var. <i>hyalina</i> (W. Greg.) Grunow ex<br>Van Heurck 1881 | Bas.: <i>Nitzschia hyalina</i> W.<br>Greg. 1857                                                                                                                                                                                    | - | - | - | + | - |

| 1                                                                      | 2                                                                                                                                                                                                                                   | 3 | 4 | 5 | 6 | 7 |
|------------------------------------------------------------------------|-------------------------------------------------------------------------------------------------------------------------------------------------------------------------------------------------------------------------------------|---|---|---|---|---|
| <i>Nitzschia sphaerophora</i> var. <i>acephala</i> Proschk.-Lavr. 1963 |                                                                                                                                                                                                                                     | - | - | - | + | - |
| <i>Nitzschia spectabilis</i> (Ehrenb.) Ralfs 1861                      | Bas.: <i>Synedra spectabilis</i> Ehrenb. 1843; Syn.: <i>Bacillaria spectabilis</i> (Ehrenb.) Elmore ex Barbour 1895; <i>Hantzschia spectabilis</i> (Ehrenb.) Hust. 1959                                                             | - | - | - | + | - |
| <i>Nitzschia sublinearis</i> Hust. ex A.W.F. Schmidt et al. 1921       |                                                                                                                                                                                                                                     | + | + | + | - | - |
| <i>Nitzschia thermaloides</i> Hust. 1955*                              |                                                                                                                                                                                                                                     | - | - | - | + | - |
| <i>Nitzschia tryblionella</i> Hantzsch ex Rabenh. 1848-1860            | Syn.: <i>Tryblionella gracilis</i> W. Sm. 1853                                                                                                                                                                                      | - | + | + | + | - |
| <i>Nitzschia umbonata</i> (Ehrenb.) Lange-Bert. 1978                   | Bas.: <i>Navicula umbonata</i> Ehrenb. 1837; Syn.: <i>Surirella umbonata</i> (Ehrenb.) Rabenh. 1853                                                                                                                                 | - | - | + | + | - |
| <i>Nitzschia valdestriata</i> Aleem et Hust. 1951*                     |                                                                                                                                                                                                                                     | - | - | - | + | - |
| <i>Nitzschia vermicularis</i> (Kütz.) Hantzsch ex Rabenh. 1848-1860    | Bas.: <i>Frustulia vermicularis</i> Kütz. 1833; Syn.: <i>Synedra vermicularis</i> (Kütz.) Kütz. 1844; <i>Nitzschia vermicularis</i> (Kütz.) Ralfs ex A. Pritch. 1861; <i>Bacillaria vermicularis</i> (Kütz.) Elmore ex Barbour 1895 | - | + | + | - | - |
| <i>Nitzschia vidovichii</i> (Grunow) Grunow ex Van Heurck 1881         | Bas.: <i>Homoeocladia vidovichii</i> Grunow 1862                                                                                                                                                                                    | - | + | + | + | + |
| <i>Nitzschia vitrea</i> G. Norman 1861                                 | Syn.: <i>Homoeocladia vitrea</i> (G. Norman) Kuntze 1898; <i>Nitzschia linearis</i> var. <i>vitrea</i> (G. Norman) Hust. 1909                                                                                                       | - | + | + | + | + |
| <i>Nitzschia</i> sp.1                                                  |                                                                                                                                                                                                                                     | - | - | - | + | + |
| <i>Nitzschia</i> sp.3F                                                 |                                                                                                                                                                                                                                     | - | - | - | + | - |
| <i>Nitzschia</i> sp.4F                                                 |                                                                                                                                                                                                                                     | - | - | - | + | - |
| <i>Nitzschia</i> sp.5                                                  |                                                                                                                                                                                                                                     | - | - | - | + | - |
| <i>Nitzschia</i> sp.6                                                  |                                                                                                                                                                                                                                     | - | - | - | + | - |
| <i>Nitzschia</i> sp.7                                                  |                                                                                                                                                                                                                                     | - | - | - | + | - |
| <i>Nitzschia</i> sp.8                                                  |                                                                                                                                                                                                                                     | - | - | - | + | - |
| <i>Nitzschia</i> sp.9                                                  |                                                                                                                                                                                                                                     | - | - | - | + | - |
| <i>Nitzschia</i> sp.10K                                                |                                                                                                                                                                                                                                     | - | - | - | + | - |
| <i>Nitzschia</i> sp.B13                                                |                                                                                                                                                                                                                                     | - | - | - | + | - |
| <i>Nitzschia</i> sp.B21                                                |                                                                                                                                                                                                                                     | - | - | - | + | - |
| <b><i>Denticula</i> Kütz. 1844</b>                                     |                                                                                                                                                                                                                                     |   |   |   |   |   |
| <i>Denticula denticula</i> (Grunow) Schönf. 1907*                      | Bas.: <i>Nitzschia denticula</i> Grunow ex Cleve et Grunow 1880; Syn.: <i>Denticula kuetzingii</i> Grunow 1862                                                                                                                      | - | - | - | + | - |
| <i>Denticula subtilis</i> Grunow 1862                                  |                                                                                                                                                                                                                                     | - | - | - | + | - |
| <i>Denticula tenuis</i> Kütz. 1844                                     | Syn.: <i>Odontidium tenue</i> (Kütz.) Pfitzer 1871                                                                                                                                                                                  | - | - | + | - | - |

| 1                                                                                                 | 2                                                                                                                                                                                                                | 3 | 4 | 5 | 6 | 7 |
|---------------------------------------------------------------------------------------------------|------------------------------------------------------------------------------------------------------------------------------------------------------------------------------------------------------------------|---|---|---|---|---|
| <b><i>Pseudo-nitzschia</i> H. Perag. 1900</b>                                                     |                                                                                                                                                                                                                  |   |   |   |   |   |
| <i>Pseudo-nitzschia delicatissima</i> (Cleve) Heiden ex Heiden et Kolbe 1928                      | Bas.: <i>Nitzschia delicatissima</i> Cleve 1897                                                                                                                                                                  | + | + | + | + | - |
| <i>Pseudo-nitzschia seriata</i> (Cleve) H. Perag. et Perag. 1899                                  | Bas.: <i>Nitzschia seriata</i> Cleve 1883                                                                                                                                                                        | - | + | - | - | - |
| <b>RHOPALODIALES D.G. Mann 1990</b>                                                               |                                                                                                                                                                                                                  |   |   |   |   |   |
| <b>Rhopalodiaceae (G. Karst.) Topach. et Oksijuk 1960</b>                                         |                                                                                                                                                                                                                  |   |   |   |   |   |
| <b><i>Epithemia</i> Kütz. 1844</b>                                                                |                                                                                                                                                                                                                  |   |   |   |   |   |
| <i>Epithemia adnata</i> (Kütz.) Bréb. 1838                                                        | Bas.: <i>Frustulia adnata</i> Kütz. 1833; Syn.: <i>Eunotia adnata</i> (Bréb.) Rabenh. 1853; <i>Epithemia adnata</i> (Kütz.) Ross 1950                                                                            | - | + | - | - | - |
| <i>Epithemia argus</i> (Ehrenb.) Kütz. 1844                                                       | Bas.: <i>Eunotia argus</i> Ehrenb. 1843                                                                                                                                                                          | + | - | - | - | - |
| <i>Epithemia hyndmannii</i> W. Sm. 1850                                                           |                                                                                                                                                                                                                  | + | - | + | - | - |
| <i>Epithemia sorex</i> Kütz. 1844                                                                 | Syn.: <i>Eunotia westermanni</i> var. <i>sorex</i> (Kütz.) Rabenh. 1847; <i>Eunotia sorex</i> (Kütz.) Rabenh. 1853                                                                                               | - | + | + | - | - |
| <i>Epithemia turgida</i> (Ehrenb.) Kütz. 1844                                                     | Bas.: <i>Navicula turgida</i> Ehrenb. 1830; Syn.: <i>Cymbella turgida</i> (Ehrenb.) Hassall 1845                                                                                                                 | + | + | + | + | + |
| <i>Epithemia turgida</i> var. <i>granulata</i> (Ehrenb.) Brun 1880                                | Bas.: <i>Eunotia granulata</i> Ehrenb. 1836; Syn.: <i>Epithemia granulata</i> (Ehrenb.) Kütz. 1844; <i>Epithemia turgida</i> f. <i>granulata</i> (Ehrenb.) Hust. 1957                                            | - | + | - | + | - |
| <b>Rhopalodia O. Müll. 1895</b>                                                                   |                                                                                                                                                                                                                  |   |   |   |   |   |
| <i>Rhopalodia acuminata</i> var. <i>protracta</i> (Grunow) Krammer ex Lange-Bert. et Krammer 1987 | Syn.: <i>Rhopalodia gibberula</i> var. <i>protracta</i> (Grunow) O. Müll. 1900; <i>Epithemia gibberula</i> var. <i>protracta</i> Grunow ex Van Heurck 1882-1885                                                  | + | + | + | - | - |
| <i>Rhopalodia arcuata</i> (Pant.) Kisselev ex Proschk.-Lavr. 1950                                 | Bas.: <i>Epithemia arcuata</i> Pant. 1903                                                                                                                                                                        | - | + | - | + | + |
| <i>Rhopalodia gibba</i> (Ehrenb.) O. Müll. 1895                                                   | Bas.: <i>Navicula gibba</i> Ehrenb. 1830; Syn.: <i>Pinnularia gibba</i> (Ehrenb.) Ehrenb. 1843; <i>Epithemia gibba</i> (Ehrenb.) Kütz. 1844; <i>Epithemia ventricosa</i> var. <i>gibba</i> (Ehrenb.) Schum. 1869 | + | + | + | + | + |
| <i>Rhopalodia gibba</i> var. <i>parallela</i> (Grunow) H. Perag. et Perag. 1900                   | Bas.: <i>Epithemia gibba</i> var. <i>parallela</i> Grunow 1862; Syn.: <i>Rhopalodia parallela</i> (Grunow) O. Müll. 1895                                                                                         | - | + | - | - | - |
| <i>Rhopalodia gibberula</i> (Ehrenb.) O. Müll. 1900                                               | Bas.: <i>Eunotia gibberula</i>                                                                                                                                                                                   | + | - | + | + | - |

[illegible]

[illegible]

| 1                                                                                                                                                                                                                                 | 2                                                                                                                                                                                         | 3 | 4 | 5 | 6 | 7 |
|-----------------------------------------------------------------------------------------------------------------------------------------------------------------------------------------------------------------------------------|-------------------------------------------------------------------------------------------------------------------------------------------------------------------------------------------|---|---|---|---|---|
| <i>Campylodiscus daemelianus</i> Grunow ex A.W.F. Schmidt 1874                                                                                                                                                                    |                                                                                                                                                                                           | - | - | + | + | + |
| <i>Campylodiscus decorus</i> Bréb. 1854                                                                                                                                                                                           | Syn.: <i>Campylodiscus ralfsii</i> var. <i>decorus</i> (Bréb.) Rabenh. 1864; <i>Campylodiscus concinnus</i> var. <i>decorus</i> (Bréb.) Cleve et J.D. Möller 1879                         | + | - | + | + | + |
| <i>Campylodiscus echeneis</i> Ehrenb. 1844                                                                                                                                                                                        |                                                                                                                                                                                           | - | + | + | + | + |
| <i>Campylodiscus eximius</i> W. Greg. 1857                                                                                                                                                                                        |                                                                                                                                                                                           | - | - | - | + | + |
| <i>Campylodiscus fastuosus</i> Ehrenb. 1845                                                                                                                                                                                       |                                                                                                                                                                                           | + | - | - | - | - |
| <i>Campylodiscus impressus</i> Grunow ex A.W.F. Schmidt et al. 1877                                                                                                                                                               |                                                                                                                                                                                           | - | - | - | + | + |
| <i>Campylodiscus limbatus</i> Bréb. 1854                                                                                                                                                                                          |                                                                                                                                                                                           | - | - | - | + | + |
| <i>Campylodiscus noricus</i> Ehrenb. ex Kütz. 1844                                                                                                                                                                                |                                                                                                                                                                                           | - | - | - | + | - |
| <i>Campylodiscus parvulus</i> W. Sm. 1851                                                                                                                                                                                         |                                                                                                                                                                                           | - | - | - | + | + |
| <i>Campylodiscus ralfsii</i> W. Sm. 1853                                                                                                                                                                                          |                                                                                                                                                                                           | - | - | - | + | - |
| <i>Campylodiscus thuretii</i> Bréb. 1854                                                                                                                                                                                          |                                                                                                                                                                                           | - | + | + | + | + |
| <i>Campylodiscus thuretii</i> var. <i>lineolatus</i> Proschk.-Lavr. 1955                                                                                                                                                          |                                                                                                                                                                                           | - | + | + | + | + |
| <i>Campylodiscus</i> sp.1                                                                                                                                                                                                         |                                                                                                                                                                                           | - | - | - | + | - |
| <b><i>Cymatopleura</i> W. Sm. 1851</b>                                                                                                                                                                                            |                                                                                                                                                                                           |   |   |   |   |   |
| <i>Cymatopleura elliptica</i> (Bréb.) W. Sm. 1851                                                                                                                                                                                 | Bas.: <i>Surirella elliptica</i> Bréb. ex Kütz. 1844                                                                                                                                      | + | - | + | + | - |
| <i>Cymatopleura solea</i> (Bréb.) W. Sm. 1851                                                                                                                                                                                     | Bas.: <i>Surirella solea</i> Bréb. ex Bréb. et Godey 1838; Syn.: <i>Cymatopleura librile</i> (Ehrenb.) Pant. 1902, <i>Cymbella solea</i> Bréb. 1835; <i>Navicula librile</i> Ehrenb. 1832 | - | + | + | + | - |
| <i>Cymatopleura solea</i> var. <i>apiculata</i> (W. Sm.) Ralfs ex A. Pritch. 1861                                                                                                                                                 | Bas.: <i>Cymatopleura apiculata</i> W. Sm. 1853; Syn.: <i>Cymatopleura librile</i> var. <i>apiculata</i> (W. Sm.) Descy 1983                                                              | - | - | - | + | - |
| <b>Main References used in Supplementary Material:</b> Bulgaria – [1,2]; Romania – [3-5]; NWBS – [6-14]; Crimea – [8,14-29]; NEBS – [8,11,12,24].                                                                                 |                                                                                                                                                                                           |   |   |   |   |   |
| <b>Note:</b> # – new for the Black Sea diatom flora genus; * – new for the Black Sea diatom flora species; ** described for the science species [27-29]; *** – cryptic species overlooked in the Black Sea over past 50–100 years |                                                                                                                                                                                           |   |   |   |   |   |

### Main References used in Supplementary Material:

1. Petrova-Karadjova, V.I. Diatom algae of marine fouling. *Izvestiya na Institut po Ribni resursi*, 1977, 15, 55-65. [Petrova-Karadzova V. I. Diatomovye vodorosli morskikh obrastanij. *Izvestiya na Instituta po ribni resursi*, 1977, 15, 55–65. (In Russian)]
2. Konsulov, A. *Black Sea Biological Diversity: Bulgaria*; GEF Black Sea Environmental Series; Institute of Oceanology BAS, United Nations Publications: New York, NY, USA, 1998; Volume 5, 131p.
3. Petranu, A. *Black Sea Biological Diversity: Romania*; GEF Black Sea Environmental Series; Romanian Marine Research Institute, United Nations Publications: New York, NY, USA, 1997; Volume 4, 314p.
4. Bodeanu, N. Structure et dynamique de l'algoflore unicellulaire dans les eaux du littoral Roumain de la mer Noire. *Cercet. Mar.* 1987, 20, 19–250.
5. Căraus, I. *The algae of Romania : A distributional checklist of actual algae* [Version 2.3], Studii si Cercetari. Biologie ; Universitatea Bacau, Romania, 2012, 809p.

6. Guslyakov, N.; Zakordonez, O.; Gerasimuk, V. *Atlas of Diatom Algae of Benthos of the Black Sea North-West Part and Adjacent Aquatories*; Naukova Dumka: Kiev, Ukraine, 1992. (In Russian, Abstract in English)
7. Nevrova, E.L. Benthic diatoms (Bacillariophyta) at Zernov *Phyllophora* Field (Northern-Western part of the Black Sea): taxonomic diversity and structure of taxocene. *Marine ecological J.* **2014b**, 13(3), 47–58. (In Russian, Abstract in English)
8. Nevrova, E.L. *Diversity and Structure of Benthic Diatom Taxocenes (Bacillariophyta) of the Black Sea*; Gaevskaya, A.V., Ed.; A. O. Kovalevsky Institute of Biology of the Southern Seas RAS. Sevastopol: IBSS, 2022; 329p. (In Russian, Abstract in English). <https://doi.org/10.21072/978-5-6048081-0-8> <https://repository.marine-research.org/handle/299011/12192>.
9. Nevrova, E.L.; Snigireva, A.A.; Petrov, A.N.; Kovaleva, G.V. *Guidelines for Quality Control of the Black Sea. Microphytobenthos*. Gaevskaya, A.V., Ed.; N. Orianda: Sevastopol—Simferopol, 2015; 176p. (In Russian, Abstract in English). <https://doi.org/10.21072/978-5-9907290-2-5>.
10. Proshkina-Lavrenko, A.I. *Planctonic Diatoms of the Black Sea*; Moscow-Leningrad: AS USSR, 1955; 222p. [Proshkina-Lavrenko, A.I. Diatomovyye vodorosli planktona Chernogo morya. Moskva–Leningrad: Izd. AN SSSR, 1955. 222 s. (In Russian)]
11. Proshkina-Lavrenko, A.I. *Benthic Diatoms of the Black Sea*; Moscow-Leningrad: AS USSR, 1963; 243p. [Proshkina-Lavrenko A. I. Diatomovyye vodorosli bentosa Chernogo morya. Moskva–Leningrad: Izd. AN SSSR, 1963. 243 s. (In Russian)]
12. Ryabushko, L.I. Microphytobenthos of the Zernov *Phyllophora* field; Academy of Sciences Ukrainian SSR, Kovalevsky Institute of Biology of the Southern Seas. Sevastopol, **1991**, 28p. Dep. of VINITI 02.07.1991, 2981–V-91. [Ryabushko, L.I. Mikrofitobentos Fillofornogo polya Zernova; AN USSR, InBUM im. A. O. Kovalevskogo. Sevastopol, **1991**, 28s. Dep. VINITI 02.07.1991, 2981–V-91 (In Russian)]
13. Tsarenko, P.M.; Wasser, S.P.; Nevo, E. (Eds.) *Algae of Ukraine: Diversity, Nomenclature, Taxonomy, Ecology and Geography. 2. Bacillariophyta*; A.R.G. Gantner Verlag K.G.: Ruggell, Liechtenstein, 2009; 413p.
14. Zaitsev, Y.; Alexandrov, B.G. *Black Sea Biological Diversity: Ukraine*; GEF Black Sea Environmental Series; NASU Odessa Branch Institute of Biology of the Southern Seas, United Nations Publications: New York, NY, USA, 1998; Volume 7, 351p.
15. Guslyakov, N.E., Nevrova E.L. Composition of diatom algae on solid substrates in the Sevastopol Bay area; Ukrainian Academy of Sciences, A.O. Kovalevsky Institute of Biology of Southern Seas. Sevastopol, 1987, 14p. Dep. VINITI 29.04.87, 3019–V87 [Guslyakov, N.E., Nevrova, E.L. Sostav diatomovykh vodoroslej na tverdykh substratah v rajone Sevastopol'skoj buhty; AN USSR, Institut biologii yuzhnykh morej im. A.O. Kovalevskogo. Sevastopol, 1987, 14s. (In Russian)]
16. Kovalchuk, Y.L., Nevrova, E.L., Shalaeva E.A. *Diatom fouling of solid substrates*; Russian Academy of Sciences, A.N. Severtsov Institute for Ecology and Evolution, KMK: Moscow, 2008, 174p. [Kovalchuk, Yu.L., Nevrova, E.L., Shalaeva E.A. Diatomovye obrastaniya tverdykh substratov; Rossijskaya akademiya nauk, Institut problem ekologii i evolyucii im. A.N. Severtsova; KMK: Moskva, **2008**; 174s. (In Russian)]
17. Kucheroва Z. S. Diatom algae and their role in the fouling cenosis of the Black Sea: Thesis of PhD: 03.00.18 "Hydrobiology"; Sevastopol, 1973, 145p. [Kucheroва, Z.S. Diatomovye vodorosli i ih rol' v cenoze obrastaniya Chornogo morya : dissertaciya na soiskanie uchenoj stepeni kandidata biologicheskikh nauk : 03.00.18 «Gidrobiologiya». Sevastopol, 1973. 145s. (In Russian)]
18. Nevrova, E.L. Diatom algae of stony substrates of the Black Sea near Karadag (Crimea). *Biological Sciences* **1991**, 5 (329), 79–86. [Nevrova, E.L. Diatomovye vodorosli kamenistyh gruntov Chornogo morya u Karadaga (Krym). *Biologicheskie nauki* **1991**, 5 (329), 79–86. (In Russian)]
19. Nevrova, E.L. Benthic diatom algae in shallow water near Sevastopol (Black Sea). *Algologia* **1998**, 8(3), 278–285. [Nevrova, E L. Donnye diatomovye vodorosli na melkovodye u Sevastopolya (Chornoe more). *Algologia* **1998**, 8(3), 278–285. (In Russian)]
20. Nevrova E.L. Benthic diatom algae on soft bottom in the deep-water part of the mouth of Sevastopol Bay. *Algologia* **1999**, 9(1), 43–54. [Nevrova, E.L. Donnye diatomovye vodorosli ryhlyh gruntov v glubokovodnoj chasti ustiya Sevastopolskoj buhty. *Algologia* **1999**, 9(1), 43–54. (In Russian)]
21. Nevrova, E.L. Structure and taxonomical diversity of benthic diatom at estuarines of Rivers Belbek and Chernaya (South-West Crimea, Ukraine). *Algologia* **2013a**, 23(4), 471–492. (In Russian, Abstract in English)
22. Nevrova, E.L. Taxonomic diversity and structure of benthic diatom taxocene (Bacillariophyta) at Sevastopol Bay (the Black Sea). *Mar. ecol. J.* **2013b**, 12(3), 55–67. (In Russian, Abstract in English).
23. Nevrova, E.L. Taxonomic diversity and environmental assessment of benthic diatoms at Balaklava Bay (South-Western Crimea, the Black Sea, Ukraine). *Algologia* **2014a**, 24(1), 47–66. (In Russian, Abstract in English)
24. Ryabushko, L. *Microalgae of the Black Sea Benthos*; – Kovalevsky Institute of Biology of the Southern Seas, NAS of Ukraine. EKOSI-Gidrophizica: Sevastopol, 2006; 143p. (In Russian, Abstract in English)
25. Bukhtiyarova, L.N. *Diatoms of Ukraine. Inland waters*; National Academy of Sciences of Ukraine, N.G. Kholodny Institute of Botany. Kyiv, Ukraine, 1999; 132p.
26. Davidovich, N.A. Gastineau, R., Gaudin, P., Davidovich, O.I., Mouget, J.-L. Sexual reproduction in the newly-described blue diatom, *Haslea karadagensis*. *Fottea*. **2012**, 12(2), 219–229.
27. Nevrova, E.; Witkowski, A.; Kulikovskiy, M.; Lange-Bertalot, H.; Kociolek, J.-P. A revision of the diatom genus *Lyrella* Karayeva (Bacillariophyta: Lyrellaceae) from the Black Sea, with descriptions of five new species. *Phytotaxa* **2013**, 83, 1–38. <https://doi.org/10.11646/phytotaxa.83.1.1>
28. Witkowski, A.; Kulikovskiy, M.; Nevrova, E.; Lange-Bertalot, H.; Gogorev, R. The genus *Navicula* in ancient basins. I. Two novelties from the Black Sea. *Plant Ecol. Evol.* **2010**, 143, 307–317. <https://doi.org/10.5091/plecevo.2010.421>
29. Witkowski, A.; Nevrova, E.; Lange-Bertalot, H.; Kociolek, J. *Navicula petrovii* sp. nov. (Bacillariophyceae), a naviculoid diatom with amphoroid symmetry and its relationship to *Navicula sensu stricto* and other naviculoid genera. *Nova Hedwigia* **2014**, 143, 469–484.
